# Supplementary material for: Highly localized intracellular Ca2+ signals promote optimal salivary gland fluid secretion
Source: eLife. 2021 Jul 9;10:e66170. doi: 10.7554/eLife.66170 (PMC8352588; doi:10.7554/eLife.66170)
Supplement: Figure 2—source data 1. [file elife-66170-fig2-data1.csv]

FIG2B																																					FIG2C
	MG11-00hz	MG11-01hz	MG11-03hz	MG11-05hz	MG11-10hz	MG11-30hz	MG11-50hz	MG11-100hz		MG23-00	MG23-01	MG23-03	MG23-05	MG23-10	MG23-30	MG23-50	MG23-100		MG31-00	MG31-01	MG31-03	MG31-05	MG31-10	MG31-30	MG31-50	MG31-100		MG41/42-0	MG41/42-1	MG41/42-3	MG41/42-5	MG41/42-10	MG41/42-30	MG41/42-50	MG41/42-100			Ipsi	Ipsi	Ipsi	Ipsi		contra	contra	contra	contra
0	-0.459127313	-1.468838902	1.220685682	0.020918427	11.48752311	2.188584821	6.794099314	6.449886197	0	-1.631676226	1.030401942	0.537665962	0.447190274	-0.445942474	-1.371187754	-1.798145662	-1.23995451	0	-0.156023097	-0.811455542	-2.314781329	0.448039642	-0.353664963	-0.365125686	2.325038751	0.072935403	0	-0.168911111	0.108843422	0.608439071	1.711512554	-2.256113469	-0.067509097	-0.305484494	2.398063487		Stim(hz)	M11	M23	M31	M41+42	Stim(hz)	M12/22	M24	M32	M43
0.1	0.378414277	-0.871631172	-0.782680617	1.478541111	9.795107432	3.153359531	6.801490364	6.28992809	0.1	-0.497873931	-0.475731556	-1.14967264	0.788432852	0.396699169	0.784483051	-1.229981581	-1.589636803	0.1	0.011453219	-0.472949885	-2.006314007	0.159968935	0.11224739	-0.478653068	2.073923454	-0.360762402	0.1	-1.911597172	0.782470152	-0.719110092	1.199742799	-1.418853843	-0.032550026	-0.306129124	1.340220947		0	1.871852027	0.819092686	1.26698534	1.351460431	0	2.565363164	1.207452436	1.580854238	0.918043494
0.2	-1.1618732	-0.880556831	0.611630145	-1.142512828	10.64275358	2.845865125	6.977233103	6.757291722	0.2	-0.400993629	1.245102645	0.284972742	-0.123172321	0.373759742	0.27669563	-1.311147879	-1.822758332	0.2	-0.170069497	-0.776327597	-1.833997779	0.011185163	-0.023777596	-0.232136466	2.413929121	0.077056047	0.2	0.10063365	0.484383609	-0.247317057	1.743297593	-0.485744258	-2.133341584	0.63522863	2.813939682		1	2.457639634	2.329906194	0.734174062	4.517099175	1	0.589607116	2.453214001	0.32735179	1.162726545
0.3	-0.31775621	0.45180063	0.104754334	-0.164930548	11.37629352	4.667042591	7.728656496	4.749325987	0.3	-0.836954992	1.258016973	0.196937684	0.286318773	-0.600401287	-0.679044389	-2.160272219	-2.788322502	0.3	0.058994883	-0.984966304	-1.83612514	0.022792408	-0.14802089	-0.211593416	2.376150714	-0.34943063	0.3	0.120319512	0.607743813	0.685787505	1.601303474	-0.177369991	-0.158056563	0.896477975	2.21017923		3	6.250020114	23.82456895	19.88210166	42.51605018	3	0.828610341	0.262333996	0.639069186	1.122443927
0.4	-0.29638616	-1.326028358	1.530443122	0.550129636	11.39163554	2.023824208	6.381842983	6.652738099	0.4	-0.953514106	0.65427214	0.35833529	0.335067712	-0.225723968	-1.148020033	-1.617082384	-1.613263985	0.4	-0.050134845	-0.767811731	-2.299889803	0.514517497	-0.405075981	-0.320795946	1.788363139	-0.406089488	0.4	-0.570207775	0.342433856	0.681243771	2.561469122	-1.730171984	-0.432235234	0.151161801	3.027619122		5	14.52130554	23.56231252	59.14904124	77.12177364	5	2.67719732	1.007168696	0.915879328	1.287235252
0.5	0.548552754	-0.507302	-0.495450991	1.469373672	12.04558879	3.425611024	7.567695857	6.079927224	0.5	-0.261728193	-0.755003899	-0.892088583	0.905430307	0.127543218	-0.069376052	-0.783566947	-1.451024002	0.5	0.386384067	-0.522980596	-2.082898997	0.390003419	-0.695334022	-0.360800833	2.630599399	-0.094980849	0.5	-1.891100545	0.729161317	-0.754185516	0.385034497	-0.345812147	0.171815618	-0.932880956	0.903703746		10	15.14179854	63.59176383	144.3126561	197.8800298	10	4.671327924	1.551304746	0.1879988	0.838382885
0.6	-1.415026104	-0.362057186	0.342100944	-0.538295307	10.10194767	2.968334244	7.13162392	7.376570874	0.6	-0.438837497	1.038473397	0.139877925	-1.257397652	0.519042784	-0.174491283	-0.757031811	-1.814882604	0.6	0.00713125	-0.573011306	-2.169057111	0.314028727	-0.672841701	-0.627860485	2.411706862	-0.108372943	0.6	-0.013945196	-0.069340432	0.058462805	1.949874747	-0.393085489	-1.865401993	0.615458701	2.777158732		30	48.59733211	135.4613507	231.5323926	368.9459325	30	14.02474808	0.831434893	0.498683941	0.530400233
0.7	-0.076110256	0.830735426	0.219807098	0.290941154	11.38012903	4.28201378	8.035795675	4.888730817	0.7	-0.977734182	1.729389943	0.601246837	0.357817217	-0.852734991	-0.748582157	-2.316361252	-2.077931897	0.7	0.228632183	-1.098866006	-1.728693418	-0.241008606	-0.427568302	-0.463516084	2.511708528	0.173891186	0.7	0.166698671	0.761843358	0.779282223	0.11190515	-0.24957624	-0.13906997	0.647429644	1.358248936		50	95.36926095	141.3074017	201.7305844	389.5889473	50	3.0761361	1.131091139	-3.002718604	0.957567561
0.8	0.139234097	-1.412850677	0.906100854	0.975998813	11.85477252	1.963911258	7.920002562	5.905671185	0.8	-0.340443439	0.806015494	0.082818165	0.694184901	0.173422073	-0.913532211	-0.995848032	-1.002107545	0.8	0.100053592	-0.317535338	-1.319176456	0.593657802	-0.246558675	-0.577043466	2.333927788	-0.197996955	0.8	-0.307013461	-0.234730576	0.547056127	2.026854404	-1.397223468	-0.213833564	-0.118889429	2.389587027		100	52.11211723	136.4120076	111.3334199	312.4557411	100	3.0761361	0.820023632	9.131387535	2.884096672
0.9	0.037315396	-0.561667378	-0.713488046	0.814318538	12.09545033	2.860843363	7.733583863	5.928011703	0.9	-0.384342327	0.365314052	-0.746993766	0.804682498	0.696441024	0.026036234	-1.323635001	-1.072989091	0.9	-0.097676509	-0.77739208	-1.560631911	-0.001477286	-0.639638752	-0.683002356	2.681711362	-0.576066062	0.9	-2.190316986	0.696091168	-0.955802502	-0.307896272	-0.256745256	0.489479613	-1.17946917	1.611093927
1	-0.459127313	-1.01768741	-0.089145777	-0.07658978	10.53056512	3.215915699	8.000482882	5.981628945	1	-0.640166876	1.149859476	0.169222944	-1.143650126	0.288119212	0.391513805	-1.013017825	-2.975764812	1	-0.097676509	-0.765682765	-1.952066306	0.328801584	-0.111604752	-0.193212792	2.725045417	-0.145458741	1	0.092510889	-0.030251049	-0.611841083	2.089246898	-0.100456827	-1.840246067	0.378450649	1.4406422
1.1	-0.023507055	0.432326465	-0.332124341	0.312609645	12.10599796	4.261749106	6.625747625	6.565163269	1.1	-1.616538679	0.96098743	0.655046039	0.622686457	-0.724274197	-1.059076377	-1.816876346	-1.584911367	1.1	0.044948482	-0.401629511	-1.91164645	-0.136543405	-0.998444817	-0.562987695	2.370595065	-0.43699432	1.1	-0.016817982	0.597765086	0.642786897	0.748665263	-0.893358373	-0.229440448	0.545842852	2.100678443
1.2	0.903624361	-2.297302341	1.164366148	1.098509125	11.72340654	2.41854482	7.659673365	5.306051689	1.2	-0.248104401	0.336256814	-0.29051569	0.573937517	0.355408199	-0.353995753	-0.714887772	-0.370474213	1.2	0.317232557	-0.521916112	-1.70848349	0.323525563	-0.444705308	-0.543525858	2.548375806	-0.143398419	1.2	-0.529474518	-0.15057921	0.679370777	2.218080379	-2.230090718	-0.541298203	0.396972689	2.464916241
1.3	-0.944063071	-0.567347343	-0.91462924	-0.441620503	12.77433435	3.422086733	7.17186408	6.379290161	1.3	-0.249618155	0.920630155	-0.130748363	0.401691263	0.480810404	0.490160406	-0.722692224	-1.159622091	1.3	-0.017720075	-1.033932531	-1.63402586	0.374175358	-0.634283438	-0.61596714	2.600598899	-0.248474847	1.3	-1.727257896	0.505681394	0.191769054	0.997656921	-0.601210052	0.642498243	-0.807554441	2.380588721
1.4	-0.035014006	-0.72232924	-0.037653632	0.458455253	10.0492095	3.591252709	8.452979373	5.645627559	1.4	-0.927780275	1.290302793	0.606137674	-1.210273677	0.072488591	-0.056438793	-0.881903037	-3.043496067	1.4	-0.284601687	-1.17018638	-1.651044747	-0.139709017	-0.618217494	-1.033315421	2.62837714	-0.503954788	1.4	-0.193284324	0.247718172	-1.49590683	1.209810778	-0.062762121	-1.999906866	0.66724391	0.807845219
1.5	-0.300495785	0.428269347	-0.439936021	0.26593905	12.31599175	3.897866042	6.577295188	7.531167256	1.5	-0.62200182	1.135330857	0.534405405	0.261944303	-0.45053036	-1.165808765	-1.510941841	-1.147020927	1.5	-0.344028767	-1.045641846	-1.494683725	-0.173475547	-0.398649604	-0.650565961	2.049478602	-0.415360938	1.5	-0.21910482	0.184442428	0.603440488	0.478415432	-0.056231542	-0.708473468	0.655741176	2.192024133
1.6	0.830473034	-1.312234157	0.853804143	1.812735905	12.0925737	2.654672329	7.705662119	4.348090288	1.6	-0.455488799	-0.143187611	-0.768187391	0.684435114	0.751495651	0.630853099	-0.889707489	-1.172223255	1.6	-0.284601687	-0.828487274	-1.732948139	0.119871181	-0.191934468	-0.746793933	2.672822325	0.045121054	1.6	-0.107437392	-0.333859307	0.542609318	1.82369426	-1.30865606	-0.478645801	0.734159756	3.036663927
1.7	-1.093653424	-0.735312017	-1.531730426	-0.504125764	12.69282991	2.9859557	7.452723971	6.272055676	1.7	-0.484250139	0.959373139	-0.156832825	-0.082548205	0.954891909	0.422239795	-0.828832766	-2.334680608	1.7	-0.326740889	-1.53956205	-1.643598984	-0.30959687	-0.020564407	-0.432160902	2.661711029	0.026578155	1.7	-2.071533904	0.372341952	-0.075069693	2.475966443	-2.050665321	0.690749777	-1.867914722	2.925736518
1.8	-0.131179232	-0.261440666	-0.147879006	0.63263658	10.56220802	3.785088724	7.995555515	6.205034123	1.8	-0.833927482	1.382317379	-0.059016094	-0.074423381	-0.288425071	-0.816502768	-1.059844535	-3.117527904	1.8	-0.345109259	-0.864679702	-1.301093889	-0.225180545	-0.760668857	-0.444054247	2.846158547	0.072935403	1.8	-0.45853242	0.150808926	-1.185077135	0.285003959	0.114135384	-1.564575779	0.468479894	0.849553457
1.9	-0.270906485	0.531320137	-0.419821902	0.344278977	11.12986246	3.090803362	6.851585257	6.675078616	1.9	-0.693148292	1.488860585	0.567010982	0.861556261	-0.262427053	-1.401913744	-1.448506228	-1.794405713	1.9	-0.192759837	-1.082898758	-1.07559364	0.249661279	-0.309751385	-0.065629639	2.720600899	0.019367028	1.9	-0.207514321	-0.066511208	0.686259946	-0.010883314	-0.100601941	-0.235975753	0.392323027	2.62495758
2	0.932391736	-1.339822558	0.852195014	1.497709391	12.20859766	3.075825125	7.750008418	6.011118429	2	0.037995244	0.044070144	-1.033922842	0.788432852	0.297294983	0.7294997	-0.98804358	-1.301385183	2	-0.020961552	-0.936000077	-1.097930929	-0.059513509	0.202216672	-0.192131579	2.997272177	0.214067467	2	-0.025696401	0.594006637	0.946805497	1.657700924	-0.94916672	-0.392784928	0.171738578	2.9587073
2.1	-0.970364672	-0.947093562	-0.969339645	-0.703309195	12.18079027	3.135738075	7.67609792	6.036139809	2.1	-0.19663674	0.743058145	0.252367165	-0.98115366	0.413521416	0.299335833	-0.480754222	-2.455966809	2.1	-0.223013623	-0.928548694	-1.094739888	-0.210407689	-0.508969081	0.228460342	3.031717195	-0.138247614	2.1	-1.588728227	-0.377933988	0.157333534	1.760536017	-2.380531563	0.213089513	-1.924924387	1.140520672
2.2	-0.205152484	-0.688249451	-0.418212772	0.868489765	12.98912251	4.422104354	8.570414942	6.84307931	2.2	-0.637139367	1.569575135	0.816443645	0.252194515	-0.965902835	-1.190066126	-0.766397153	-3.068698394	2.2	-0.077147154	-0.848712454	-1.081975723	-0.008863714	-0.371873032	-0.306740175	3.093940455	-0.581216867	2.2	-0.058119105	0.284755946	-1.239259536	0.908254739	0.198935984	-9.874210527	0.447030875	1.666565595
2.3	-0.124603832	0.821809767	-0.488209908	0.341778766	9.988800331	2.56039754	6.661881646	7.161208282	2.3	0.083407886	1.186988169	0.56864126	0.856681367	0.127543218	-0.255349152	-1.190959323	-1.773928822	2.3	-0.459641449	-0.96367664	-1.091548846	-0.00780851	-0.12552857	-0.050492655	2.828380473	0.220248434	2.3	0.010172948	-0.212210891	0.704450126	0.661370985	0.499890615	-6.220141588	0.713529013	3.148384273
2.4	1.074584763	-1.614083716	0.638180782	1.793567625	12.07627281	3.490810411	7.970918683	4.75379409	2.4	-0.120949003	-0.164173394	-0.624722853	0.63081128	0.280472736	0.427091268	-0.568164081	-1.630590585	2.4	-0.16682802	-1.215959158	-1.113886135	0.204287505	0.272906822	-0.005081702	3.040606232	-0.048623602	2.4	0.279609803	0.446006517	0.705437024	0.582179092	-0.360169321	-0.744370331	0.856906054	2.586752014
2.5	-0.956391946	-0.564913072	-1.250132753	-0.274939807	12.28147222	3.87848244	7.613684611	6.222012916	2.5	-1.032229352	0.589700501	0.040430915	-0.761783431	0.283531326	-0.336207022	-0.853807012	-3.238814104	2.5	0.305347141	-1.065867027	-1.280883961	0.329856788	0.1754401	-0.577043466	2.907270677	-0.049653763	2.5	-2.280749292	-0.26963515	0.377274506	1.520340761	-0.449114972	-0.05681628	-2.059689907	0.504892312
2.6	-0.259399534	-1.033104458	-0.31683761	0.531794759	12.63721512	4.813300675	8.37742642	6.325672919	2.6	0.010747659	0.684943669	0.281712184	0.039324145	-1.05307266	-1.026733229	-1.081697	-2.759969883	2.6	0.329117972	-0.872131085	-1.245782507	-0.014139734	0.342525909	0.000324364	3.278387973	0.114141845	2.6	0.054643865	0.108913318	-0.390872892	1.943913749	-1.079630761	0.234365405	0.484203629	2.873205445
2.7	-0.099946082	0.458292018	-0.540506618	0.510126269	10.78658494	3.116354473	7.176791447	7.046824832	2.7	0.054646546	0.63812923	0.377898636	0.20507054	0.531277145	0.561315331	-0.89439016	-1.227353346	2.7	0.067638822	-0.584720621	-1.343641106	0.012240367	-0.188721279	-0.227811614	3.158385973	0.052332182	2.7	0.32942768	0.063164079	-0.605608369	-0.555708866	0.587059359	-0.323916068	0.527526941	2.707910189
2.8	1.525821596	-1.529695667	0.124063889	1.618552895	12.04079441	3.918130716	8.204968592	5.20685979	2.8	-0.367691024	-0.123816119	-1.738203302	0.846931579	0.067900706	0.359170657	-0.586894765	-1.531356421	2.8	0.44689164	-0.282407393	-1.221317857	0.309807911	-0.278690561	-0.332689291	3.851730862	0.623041406	2.8	0.171836434	0.603544263	0.865038992	0.874516647	-0.807720205	-0.460576127	0.484207968	3.269411804
2.9	-0.897213345	-0.356377221	-0.68050089	-0.166597355	12.13092873	4.256462669	7.790248577	5.752862044	2.9	-0.402507383	0.631672066	0.45615202	-0.548913061	0.479281109	-0.404127633	-0.674304623	-3.775938708	2.9	1.013069636	-1.141445334	-1.392570405	-0.090114426	-0.108391563	-0.236461319	3.762840492	0.671458976	2.9	-2.226764125	-0.019067461	0.529255177	1.690133476	0.286744375	-1.826854486	-1.687772848	0.849557283
3	-0.189535908	-0.609541367	-0.648318299	0.714310121	13.19144529	4.045005198	9.157592784	6.463290508	3	-0.357094741	0.862515679	0.141508204	-0.316543115	-1.22741231	-0.286075143	-1.165985078	-1.310836056	3	0.457696563	-0.988159753	-1.513829973	0.061834958	0.047983617	-0.606236221	3.340611232	0.002884451	3	-0.32610075	0.021767013	-0.691673895	2.024355717	0.702758391	0.331435049	-0.096633352	2.8831766
3.1	-0.094192607	0.028237539	-0.583953116	0.720977349	9.790313054	3.402703131	6.688982162	6.424864818	3.1	-0.572047913	-0.091530299	-0.632874247	0.143321883	0.367642561	0.465903045	-1.301782537	-0.76741087	3.1	0.313991079	-0.51127128	-1.392570405	0.10931914	0.232206432	-0.432160902	3.323944288	0.201705535	3.1	0.176428422	-0.125870922	-0.649078195	0.736260226	-1.750185308	-0.325740035	0.663513471	3.113355807
3.2	1.15595534	-1.091526953	0.089467603	1.97691639	12.06668405	3.821212709	7.948745534	6.376609299	3.2	-1.269888845	0.074741673	-0.940996948	0.273319055	0.497632651	0.509566295	-0.499484906	-1.772353677	3.2	-0.040410414	-0.432499524	-1.32874958	-0.204076464	-0.191934468	-0.494871265	3.25727651	-0.091890366	3.2	0.436114057	0.610525128	0.862971275	-1.063345289	-0.527949607	-0.414536776	0.373075723	1.989460666
3.3	-1.355025578	-0.521096201	0.885986734	-0.389949487	11.51245388	4.23796014	7.887153452	5.372179621	3.3	-0.252645665	0.933544483	0.081187886	-1.223273394	0.14589476	-1.306501458	-0.497924016	-2.421313608	3.3	-0.181954913	-0.733748269	-1.157497032	0.0987671	-0.00664059	-0.588936811	3.616171381	-0.04656328	3.3	-1.557412922	0.051724544	0.888937373	1.777947503	-0.18210188	-2.03097665	-0.351417651	1.498973816
3.4	-0.108165332	-0.270366325	-1.303234029	0.763480926	12.77721098	3.652927805	9.374396911	6.576780338	3.4	-0.455488799	1.146630894	0.276821348	-0.063048629	-0.993430148	0.032504864	-1.431336434	-1.106067145	3.4	-0.083630109	-0.388855712	-1.184089043	0.078718223	-0.377228346	-0.854915249	3.291721529	0.022457511	3.4	-0.5041797	0.13991724	-0.905377622	1.472429911	0.386265209	0.224409776	-0.721595413	3.241560468
3.5	-0.059671756	-0.065076168	-0.058572316	0.756813698	10.45385506	3.29521225	6.991193975	6.2774174	3.5	-0.873285105	0.065055927	-1.54420012	0.515438789	0.344703133	0.496629035	-0.850685231	-0.849318435	3.5	-0.05229583	-0.120605946	-0.651185153	0.097711896	-0.389010038	-0.369450538	3.560614899	-0.347370308	3.5	0.3836613	-0.189575187	-0.410812146	1.936439733	0.49986179	-0.512720446	0.332636004	1.630490705
3.6	1.359792743	-1.080167023	-0.513955981	1.614385877	11.90367518	3.591252709	8.290376278	7.471294669	3.6	-0.892963917	0.055370181	-0.194329238	0.195320752	-0.23795833	-0.024095645	-0.992726251	-1.640041458	3.6	0.055753406	-0.14189561	-0.951143031	-0.3433634	-0.547527344	0.018704988	3.818396973	0.107960879	3.6	0.301485063	0.55265888	0.498444898	-2.065935589	-2.480510513	-0.427583635	-0.287127843	3.190697735
3.7	-0.403236412	-0.269554902	1.409758405	-0.521627237	12.23065181	4.719025886	8.301052239	5.054050649	3.7	0.089462905	0.738215272	0.183895453	-1.140400196	-0.297600842	-1.345313235	-0.351200325	-2.496920591	3.7	-0.017720075	-0.710329639	-1.552122468	-0.04157504	-0.655704695	0.001405577	3.481724695	-0.141338097	3.7	-0.756119404	0.209781419	0.408602465	1.393442844	-0.259277548	-1.790360303	-0.66130005	1.669271175
3.8	0.202522323	0.317104321	-1.192204089	0.739312225	13.1003521	2.646742674	9.545212283	6.576780338	3.8	-0.231453099	1.196673915	0.451261184	1.217423521	-0.490292034	0.858872291	-1.22529891	-1.551833312	3.8	-0.101998479	-0.161056308	-0.952206711	-0.074286365	-0.73175016	-0.133746068	3.922843158	-0.226841464	3.8	-0.830534545	-0.15452917	-0.573517143	1.576414407	0.380757801	0.106970912	-0.720532808	3.192638841
3.9	0.170467248	-0.459428011	0.187624506	0.175931474	10.71371039	3.728700065	6.839266841	6.286353608	3.9	-0.773377293	-0.566131852	-1.156193755	0.435815521	0.176480664	1.201709659	-0.501045797	-1.320286928	3.9	-0.104159463	-0.525109562	-1.450009148	-0.66097982	-0.619288557	-0.112121805	3.249498603	-0.006386999	3.9	0.518352018	-0.397186897	-0.771986902	1.322777087	0.202062705	-0.246678818	0.27836909	2.146853164
4	1.644178798	-0.408308328	-0.303964573	1.451872199	11.8394305	3.650284587	8.385638698	7.471294669	4	-0.440351252	0.628443484	-0.283994574	-0.548913061	0.112250266	0.619532997	-0.586894765	-3.328597396	4	-0.002593182	-0.51127128	-0.837329226	-0.327535339	-0.535745653	-0.621373206	3.568392807	0.009065417	4	0.150805578	0.692399692	0.56780963	-1.04414458	-0.375940451	-0.503428386	0.420760031	3.131512435
4.1	-0.740225668	0.021746151	1.400908193	-0.470789625	12.88844056	4.720788032	7.426444683	4.530388913	4.1	-0.39493861	0.746286727	0.319208597	-0.501789086	-0.829795564	-1.204620542	-0.741422908	-1.655792912	4.1	0.065477837	-0.614526151	-0.985180804	-0.450994213	-0.409360233	-0.031030818	2.941715695	-0.116614231	4.1	-0.943263502	0.663158013	0.793590041	1.034526197	-2.06918988	-1.592319731	-0.643237992	1.476655759
4.2	0.260057074	0.964620311	-1.313693371	0.063422005	12.40900269	2.599164743	8.929291469	6.242566193	4.2	-1.076128239	0.789872584	0.105642069	0.759183488	-1.157064732	0.16511177	-1.721662036	-1.260431401	4.2	-0.020961552	-0.449531255	-1.156433352	-0.207242076	-0.503613766	-0.125096363	3.565059418	-0.062015696	4.2	-0.783706285	-0.119605532	-0.985160929	1.284117673	0.727843453	-0.617487541	-0.602390885	1.622443674
4.3	0.00032877	-1.089092682	-0.246035909	0.445954201	12.17024263	3.88464995	7.180897586	6.433801025	4.3	-0.879340124	-0.583889053	-1.45942562	0.44231538	-0.481116263	1.048079706	-0.624356133	-0.302742958	4.3	-0.068503216	-0.494239549	-0.858602834	-0.628268495	-0.305467133	-0.175913382	3.126163214	-0.531769137	4.3	0.2652973	-0.390979961	-0.267298329	1.652375811	0.563950116	0.136294598	0.421873956	3.143104956
4.4	1.288285267	-0.505679153	-0.211439624	0.440120377	11.62560122	3.778921214	8.524426188	6.518694992	4.4	-0.740074689	0.88027288	0.125205415	-0.487164404	-0.254780577	0.038973493	-0.524459152	-2.025952097	4.4	-0.117125372	-0.371823981	-0.778826803	-0.601888393	-0.064477985	-0.031030818	3.448390807	0.212007145	4.4	0.177140518	0.533398089	0.560245592	-0.277881972	-0.87641599	-0.223978177	0.115881249	3.266439396
4.5	-0.728718718	0.114248435	1.001039498	-0.071589359	12.59886009	4.106680294	7.846913292	6.94405845	4.5	-0.806679897	1.354874432	0.206719357	-0.261294317	-2.019587213	0.242735325	-0.699278869	-1.339188674	4.5	-0.228416085	-0.502755415	-1.004327052	0.200066689	-0.135168135	0.850157911	3.358389306	-0.133096808	4.5	0.194906904	0.363041461	0.607101568	0.597047232	0.068304382	-1.101821095	-0.097850975	2.6236604
4.6	0.362797701	0.928917675	-1.001522237	0.159263405	12.79159411	2.555992176	9.19208435	5.87350084	4.6	-1.929885908	0.672029341	-0.805683804	0.731559089	-0.718157016	0.42547411	-1.386070615	-0.66345127	4.6	-0.247864947	-0.245150481	-0.987308165	-0.232566974	0.100465698	0.231703981	3.191719862	0.092508463	4.6	-2.322452334	-0.131188034	-0.175164498	1.357901895	-0.175311657	-1.047175496	-0.774651896	0.319940231
4.7	0.210741574	-0.660661051	-0.012712124	1.356864203	13.64595239	3.406227423	7.350070502	6.75550448	4.7	-0.81727618	-1.242519779	-1.011098938	1.570040852	-0.034562071	0.567783961	-0.689913527	-0.665026415	4.7	-0.447756033	0.058227231	-1.04900163	-0.598722781	-0.060193734	0.478220583	3.37727851	-0.196966794	4.7	-0.07701798	-0.519669094	-1.869538049	1.321109588	0.976790102	0.357930109	0.276096902	3.625154484
4.8	1.347463868	-0.055339086	-0.09799599	-0.397450119	11.83367725	4.481136231	8.434091135	6.989633106	4.8	-0.806679897	0.470242967	0.355074732	0.432565592	0.181068549	-0.724324796	-0.622795242	-3.314421087	4.8	-0.415341263	-0.481465751	-1.081975723	-0.627213291	0.218282615	0.298739197	3.242831825	-0.217570015	4.8	0.366843294	0.548028523	0.35597032	-0.331318185	-0.352899639	-0.42909513	0.115909925	3.500715932
4.9	-0.31775621	-0.045602003	1.305164984	0.26843926	12.79351186	2.889918765	8.230426652	7.326528114	4.9	-1.057963182	0.502528787	0.265409396	-0.477414616	-1.332933678	-0.559374742	-1.170667749	-1.014708708	4.9	-0.248945439	-0.093993866	-1.251100909	-0.770721042	0.115460578	0.354962282	2.792824325	-0.268047907	4.9	0.269717037	0.543539607	0.389053531	-0.424644938	-0.066316484	-1.630193422	-0.049258024	2.612533422
5	0.317591825	0.765010118	-0.834172763	0.648471246	12.77049885	3.485523974	9.514826856	5.845798598	5	-0.720395877	0.856058515	-0.504082218	0.322067995	0.126013923	-0.52379728	-1.236225143	-1.515604966	5	-0.105239956	-0.197248737	-1.011772815	0.321415155	-0.167300022	0.361449561	3.297277177	-0.065106179	5	-1.278572345	0.292315031	0.269604953	1.094789284	0.648321424	-0.842495256	0.29204846	0.956840809
5.1	0.400606252	-0.664718168	0.180383423	1.790234011	14.1714163	3.603587728	7.754935784	6.95656914	5.1	-0.62200182	-0.524160286	-1.506703707	1.17517444	0.315646525	-0.282840828	-0.691474417	-1.68099524	5.1	-0.347270244	0.086968277	-1.095803568	-0.410896459	0.59208356	0.592829178	3.390612066	0.168740381	5.1	-0.894619054	-0.812212707	-1.808646616	1.240005929	-0.656494928	0.231506652	-0.390693608	3.475663359
5.2	1.257874042	0.130476906	0.181992553	0.197599965	11.18547725	4.65735079	8.588481952	7.269336388	5.2	-0.659845688	1.442046146	-0.301927642	-0.573287531	0.041902688	-1.309735773	-0.686791746	-3.909826072	5.2	-0.176552451	-0.335631553	-1.673382036	0.019626795	0.350023349	0.763660858	2.425040417	0.061603631	5.2	-0.068337899	0.291335611	0.536115825	-0.171292255	-0.09861787	-0.430310023	0.326226303	3.754555819
5.3	-0.763239568	0.102077082	1.511938132	0.57263153	13.48486127	2.748947118	8.624615973	6.919930691	5.3	-1.674061359	1.053002016	-0.186177844	-0.178421119	-0.808385431	0.305804463	-1.172228639	-1.085590254	5.3	-0.374282553	-0.352663284	-1.55637719	0.03651006	0.3168204	0.622021933	2.603932288	-0.14442858	5.3	0.316824457	0.426745089	0.49765316	0.011337487	0.360278106	-0.601676799	0.2580504	2.354586258
5.4	-0.142686182	0.051768822	-1.077955891	0.40261722	13.0054234	3.604468801	9.185514528	4.996858923	5.4	-0.245076891	0.237785064	-0.680152333	0.541438224	0.493044766	0.512800609	-1.574938345	-1.499853511	5.4	0.097892608	-0.348405351	-1.188343764	-0.391902786	0.022278108	0.379830185	2.47837464	-0.136187292	5.4	-0.306682813	0.37667265	0.449584691	0.023205672	0.732416696	-1.901803191	0.46534848	2.713215962
5.5	-0.381044437	-0.313371773	0.04682567	1.99608467	13.91539648	3.589490564	7.498712725	6.945845691	5.5	-0.120949003	-0.327216785	-0.228565094	1.093926207	0.538923621	-0.85208023	-1.069209877	-2.203943534	5.5	-0.41858274	-0.519787146	-1.539358303	-0.302210441	-0.145878764	0.73014325	2.006144547	0.495301435	5.5	-1.441466989	-0.767347196	-2.809191886	1.455957334	1.120998187	-0.313831194	-0.999003291	2.765330907
5.6	1.43130022	-0.255760701	-0.497864685	-0.40745096	13.06391482	5.188637685	8.405348164	6.348907057	5.6	-0.074022606	0.639743521	-0.20574119	-0.067923523	-0.557581022	-0.235943264	-1.194081104	-2.818250265	5.6	-0.385087477	-0.723103437	-1.307475971	-0.201966056	0.230064307	0.414429006	2.32726101	0.141956193	5.6	0.320446971	0.244177795	0.325113929	-0.501470209	-1.401413405	-0.323991812	0.630277285	2.139880582
5.7	-1.45858813	0.752027342	0.993798415	0.97516541	12.89323494	2.21677915	8.527711099	7.52312467	5.7	-0.741588443	0.651043558	0.056733704	0.346442465	0.14589476	0.197454918	-1.361096369	-0.849318435	5.7	-0.044732384	-0.550657159	-1.178770641	-0.335976971	-0.740318663	0.304145263	3.341722362	-0.336038536	5.7	0.173590274	0.366504697	0.474489913	0.148673306	-0.548453835	-0.286619577	0.84563294	3.045871518
5.8	0.112110572	-0.622524144	-1.470583503	0.34511238	13.13295387	3.761299759	9.347296395	4.571495465	5.8	0.181801943	-0.680746513	-1.077940371	0.546313118	0.535865031	0.279929945	-1.03487029	-0.820965816	5.8	-0.18519639	-0.546399226	-1.006454413	-0.176641159	-0.481121446	0.940979817	2.672822325	0.091478302	5.8	0.229248773	0.605341836	0.586723579	0.491888344	0.738478377	-1.029183315	1.205120421	3.438351854
5.9	-0.212549809	0.179162319	0.136936925	2.477791881	12.69187104	3.932227881	7.641606354	7.068271729	5.9	-0.161820381	-0.645232111	-0.288885411	0.507313966	-0.291483661	-1.364719124	-0.925607967	-2.752094156	5.9	-0.543919853	-0.621977533	-0.971352959	-0.193524424	-0.236919109	0.992878049	2.829491603	0.068814758	5.9	-1.138213257	-0.677727369	-0.821423962	1.1854787	0.852967756	-1.340299632	-1.653793941	1.02465249
6	0.828829184	-0.00584225	-0.195348328	-0.326610823	13.56540683	4.217695466	8.202504909	6.619674132	6	-1.339521563	0.326571068	0.465933693	-0.78940783	-1.170828389	-0.274755041	-1.634252177	-1.684145531	6	-0.651969089	-0.496368516	-1.057511073	0.222225974	-0.181223839	0.523631536	3.247276343	-0.140307936	6	-1.289992902	0.422400413	-0.851828292	-0.756194883	0.289035397	0.105833511	0.490616822	2.552711084
6.1	-1.044337923	0.945146145	0.895641512	1.350196975	11.73107755	2.523392483	8.468582701	7.455209496	6.1	-0.275351986	0.898030081	0.271930511	-0.124797286	0.084722953	0.341381926	-1.156619736	-1.106067145	6.1	0.13570984	-0.808262093	-1.30322125	-0.269499116	-0.064477985	0.206836078	3.235053918	0.327385183	6.1	0.145045465	0.56764133	0.464240764	0.468227384	-0.916595238	-0.316505966	0.965933088	3.046051286
6.2	-0.390907537	-0.260629243	-0.833368198	0.856822116	13.34102991	3.601825583	9.552603333	5.074603925	6.2	0.28625102	-0.004358586	-1.068158698	0.224570116	0.367642561	-0.211685903	-1.095745013	-0.931225999	6.2	0.053592421	-0.269633594	-0.926678381	0.14308567	-0.270122058	0.322525887	3.299499436	-0.627574115	6.2	0.059750922	0.618803624	0.737294683	-0.371985186	0.171880493	-0.36783598	1.098153414	3.304569856
6.3	-0.196111308	0.291138768	-0.036044502	1.945247058	13.33431778	4.157782516	8.21318087	6.504397061	6.3	-0.612919291	-0.212602124	-0.156832825	0.920054989	-0.566756793	-1.69623639	-0.485436893	-2.722166392	6.3	-0.109561925	-0.573011306	-0.983053444	-0.178751567	-0.126599632	0.459839959	2.963938288	-0.376214817	6.3	0.028408219	-0.534249333	-0.044310882	0.863514979	0.940587576	-2.185215176	-1.380653094	1.862634559
6.4	1.43294407	0.129665483	0.428189375	0.15342958	13.6929373	3.598301292	8.533459693	6.936015864	6.4	-0.080077625	0.279756629	0.346923338	-1.304521627	-0.398534324	0.68583645	-1.980769831	-1.59751253	6.4	0.004970265	-0.858292803	-0.917105258	0.067110978	-0.185508091	0.437134482	3.081718029	0.003914612	6.4	-1.738157081	0.609591456	-1.839571631	0.67066406	0.259267293	0.434441172	0.767256899	0.708729893
6.5	-0.753376468	1.080653878	1.17321636	1.363531431	12.52886216	3.467021445	9.173196112	6.541929131	6.5	0.109141716	0.307199576	-0.142160315	0.502439072	-0.02844489	0.354319185	-1.542159648	-0.92019998	6.5	0.245920061	-0.707136189	-0.423557543	0.05972455	-0.045198854	0.460921172	3.415056918	-0.248474847	6.5	0.044050862	0.50513583	0.342549905	-0.687274879	0.050928525	-0.19482435	1.031295872	2.730939808
6.6	0.229645849	-1.004704634	-0.506714898	1.266023224	13.29596275	3.732224356	8.944894797	7.139761385	6.6	-0.034664983	-0.842175612	-1.410517255	0.385441617	-0.36488983	-0.48660266	-1.12696282	-1.47937662	6.6	0.02117765	-0.658169962	-0.654376194	-0.016250142	-0.575374979	0.125745091	3.251720862	-0.684232973	6.6	0.182313916	0.472737946	0.347182642	-0.370836971	0.072374842	-0.30443765	0.492308081	3.530308272
6.7	0.054575821	0.417720841	0.291413363	1.981916811	13.71595032	4.666161518	8.032510764	5.29443462	6.7	-0.827872463	0.323342486	0.52625401	0.642186032	-1.294701298	-1.335610291	-1.298660756	-2.342556335	6.7	0.34640585	-0.734812752	-0.570345441	-0.246284627	-0.398649604	0.304145263	3.278387973	-0.533829459	6.7	0.219561585	-0.797326712	0.087918207	1.004115975	0.772811581	-0.765729336	-0.167458889	1.695412883
6.8	1.105817914	0.372281123	0.326009648	0.433453149	14.33250742	2.783308957	8.961319352	6.961930864	6.8	0.331663662	-0.046330152	0.524623732	-1.062401893	-0.635575076	-0.072610367	-1.635813068	-1.484102057	6.8	0.257805477	-0.690104458	-0.691605009	-0.179806771	-0.436136805	0.093308696	2.730601066	-0.233022431	6.8	-1.081419649	0.683678059	-1.690269407	0.691821386	0.20964759	-1.28062522	0.572080787	2.248241143
6.9	-0.935021896	1.561016616	1.894910967	0.955163726	12.30640299	3.715483973	8.782291702	6.674184996	6.9	0.305929831	0.546114644	-0.142160315	0.999678257	0.067900706	-0.341058494	-0.682109075	-1.249405383	6.9	0.432845239	-0.847647971	-0.69585973	0.086104651	-0.439349993	-0.196456432	2.623932621	0.356229693	6.9	-0.022126685	0.469718097	0.268126763	-0.389795983	-0.037555269	0.794501211	1.098517843	3.630337266
7	-0.023507055	-0.261440666	-0.675673501	1.779399766	14.31812429	3.678478916	9.29802273	7.563337602	7	-0.650763159	-1.483049137	-1.011098938	0.933054706	-0.591225516	-1.288712727	-0.593138326	-2.318929153	7	-0.0566178	-0.612397184	-0.754362153	0.106153528	-0.186579154	-0.219161908	2.651710862	0.074995725	7	0.472936715	0.588124522	0.156221626	-1.214935411	1.045221292	-0.169133724	0.049877433	3.534522942
7.1	-0.032548231	0.563777079	0.37347897	1.300192766	13.9460805	4.713739449	7.718801763	5.643840317	7.1	-0.790028595	0.50737166	1.091960769	0.208320469	-1.95688611	-0.352378596	-0.70396154	-3.270317014	7.1	0.330198465	-0.228118749	-0.308680058	0.300311074	-0.232634858	0.29982041	2.202814491	0.213037306	7.1	0.05975554	-0.656519556	0.161920813	0.867645388	-0.601318968	-0.386449232	0.44321356	1.623597966
7.2	1.409108244	0.140213989	0.134523231	0.810151521	15.04399322	3.075825125	8.267381901	6.658993444	7.2	-0.387369836	0.515443115	0.478975924	-0.701659739	-0.432178817	0.000161716	-0.738301127	-1.39274362	7.2	0.152997718	-0.282407393	0.098709543	0.03123404	-0.225137417	0.203592439	2.472818991	0.377863075	7.2	-1.051818929	0.32161199	-1.703498538	0.88038979	-0.29119475	-1.252993514	0.769394382	2.63716327
7.3	-1.17666785	1.862054752	1.799167758	0.805984504	12.6420095	3.542793706	8.787219068	7.273804492	7.3	-0.101270192	0.657500722	-1.042074236	0.590187163	-0.02844489	-0.088781941	-0.167015266	-1.446298566	7.3	0.317232557	0.06780758	0.071053852	-0.003587694	0.303967645	0.077090499	2.265037751	0.205826179	7.3	-1.07532427	0.836100122	0.447774748	0.533309019	0.257959835	-0.105845	-0.166237241	3.805641467
7.4	0.197590773	-0.732066323	-0.654754817	1.592717387	14.13114352	3.644117077	9.382609188	7.463252082	7.4	-0.915670238	-1.607349544	-0.43071967	0.973678822	-0.809914727	-2.119931627	-0.79761496	-3.560143779	7.4	0.222149229	-0.262182212	-0.224649305	0.238054035	0.043699366	0.204673652	2.382817491	0.008035256	7.4	0.416206453	0.312972707	0.197441029	-1.942305868	0.506463001	0.180824579	0.552164726	2.95077579
7.5	-0.210905959	0.718758976	0.523128019	0.996000497	14.20497695	5.100530406	8.559738981	5.387371173	7.5	0.396755115	0.121556112	0.04858231	-0.139421968	-1.074482792	-0.048353006	-0.80073674	-2.285851098	7.5	-0.431548648	0.025228252	-0.160828479	-0.127046568	0.047983617	-0.084010263	2.615043584	-0.358702079	7.5	0.465990005	-0.203354299	0.180857927	0.679202642	0.365954393	-1.628876668	0.915100117	3.002737278
7.6	0.666909956	0.386886746	0.368651582	0.819318959	14.9855018	2.69608275	8.98020759	6.896696552	7.6	0.115196735	0.428271401	0.223022146	-0.316543115	-0.423003046	0.260524056	-0.519776481	-1.147020927	7.6	-0.131171772	0.198739013	-0.098071335	0.247550871	0.178653288	-0.1034721	2.669488936	-0.094980849	7.6	0.029349983	-0.192907024	-2.275197831	0.70868494	-1.287212384	-0.857588311	0.105344721	2.449116228
7.7	-0.805157744	1.300549658	1.476537282	1.061839371	12.81844263	3.542793706	9.737379577	7.138867765	7.7	-0.204205513	0.047298726	-1.309439967	0.721809301	0.246828242	-0.661255658	-0.446414635	-1.523480693	7.7	-0.07498617	0.212577295	0.039143439	0.501855049	0.028704485	0.554986717	2.542820158	-0.292771772	7.7	-1.786612802	0.433039711	0.360783193	0.790981843	-1.11272769	-0.669733857	-0.175100075	2.964244405
7.8	0.101425547	-0.353131527	-0.091559472	2.491126336	14.47442103	3.995665122	8.335543805	8.383681413	7.8	-1.059476937	-0.529003159	-0.057385815	0.648685891	-0.676866046	-1.227260746	-0.410514157	-3.349074287	7.8	-0.154942604	0.132741055	-0.319316862	0.319304747	0.408931808	0.406860514	2.438373973	-0.100131655	7.8	0.157037883	0.306661945	0.578668249	-1.565355308	1.018782014	0.285869529	0.744451318	3.835877733
7.9	0.192659223	0.321161439	0.546460398	0.374281502	14.31141216	4.061745581	8.55645407	6.496354474	7.9	0.03042647	0.704315161	0.164332107	-0.620411506	-0.531583004	-0.468813928	-0.945899541	-1.143870636	7.9	-0.03824943	0.261543522	-0.099135015	0.793091368	0.265409382	0.324688313	2.612821325	-0.496743661	7.9	0.600584362	-0.108530468	0.512117514	-0.824709442	0.674011258	-1.767848647	0.877783876	0.892144277
8	0.786911009	1.398731907	0.565769952	1.011835163	14.85988908	2.735731026	8.69524156	7.025377935	8	-0.037692493	0.446028602	0.002934502	0.070198473	0.077076477	-0.142148135	-0.713326882	-0.482309541	8	-0.388328954	0.353089077	0.349738122	0.174741792	-0.183365965	-0.298090469	2.876159047	-0.27113839	8	0.609876557	0.17179968	-1.886586274	0.713846418	0.500532902	-0.733512658	-1.110303465	3.045068488
8.1	-0.932556121	0.103699929	1.607681341	0.840154046	11.96120772	3.795661598	9.765301321	6.850228275	8.1	0.015288923	-0.656532148	-1.056746746	0.188820893	0.422697187	-2.040690914	0.065557394	-1.567584766	8.1	0.13570984	0.638370574	0.426323112	0.117760773	-0.165157896	0.162506339	2.643932954	-0.385486267	8.1	-1.225937102	0.33252515	0.405637288	0.563360302	-0.502120709	-0.645228374	0.313454835	3.50925099
8.2	0.02169882	0.777992895	-0.7327976	2.632804928	13.9777234	4.9031701	8.2969461	7.480230876	8.2	-0.348012213	-0.677517931	0.275191069	0.367567005	-1.121890943	-0.533500224	-0.177941498	-2.342556335	8.2	-0.273796764	0.319025615	-0.219330902	0.30453189	-0.535745653	0.361449561	2.653933121	-0.398878361	8.2	0.323616079	0.391600582	0.506698394	0.468248983	0.79439113	-0.31294303	0.955171173	2.77473419
8.3	-0.357208611	0.902952121	0.513473242	-0.09575806	13.54910594	3.385081675	8.856202199	6.203246881	8.3	0.262030944	0.00532716	0.54092652	-1.852134716	0.19024432	-0.153468237	-1.077014329	-0.883971635	8.3	-0.124688818	0.515955006	0.222096472	-0.417227683	-0.775663738	0.421997498	2.77726851	-0.188725505	8.3	0.423188799	-0.683001395	0.250980085	-2.216627993	0.946885026	-1.38209685	0.981135891	2.511721732
8.4	0.996501887	1.489611344	0.442671541	1.370198658	14.78030239	3.973638302	8.923542875	6.30154516	8.4	-0.107325211	0.324956777	-0.169875055	0.591812128	0.32023441	-0.2876923	-0.351200325	-0.761110289	8.4	-0.126849803	0.485084994	0.26996209	0.129368017	-0.381512598	0.366855627	2.479485769	-0.580186706	8.4	0.168914469	0.577204753	-1.754223815	0.167985397	-0.154068326	-0.934971052	-1.784578659	3.285332512
8.5	-0.732828343	0.305744392	1.923070734	1.078507441	11.91997607	4.023859451	9.724239933	7.064697246	8.5	-0.7597535	-1.005219003	-0.577444766	0.617811563	0.208595862	-2.082737007	-0.547872506	-3.301819923	8.5	0.124904917	0.522341906	0.239115358	-0.171365139	-0.629999186	-0.25051709	2.451707528	-0.758404569	8.5	-1.612481398	-0.115406619	-0.315502299	0.528556825	0.141934269	-0.369589207	0.675018003	2.268573891
8.6	0.060329296	0.845341049	-0.691764797	2.729479731	13.58074884	5.039736383	7.883047313	7.078995177	8.6	-0.441865006	0.11832753	0.25888828	-0.082548205	-1.805485888	-0.218154532	-0.632160584	-1.471500893	8.6	0.086007192	0.17106245	0.29442674	-0.057403101	-0.303325008	-0.050492655	2.798379973	-0.075407789	8.6	0.394577337	0.288597121	0.28076959	0.589913673	0.177155763	-0.766948615	0.948799777	3.352880756
8.7	-0.147617733	0.809638413	0.762083758	0.181765299	13.90676659	3.07758727	8.847168694	7.86359416	8.7	-0.505442705	0.404057036	0.756123327	-0.690284986	0.113779561	0.373725074	-1.489089377	-1.134419764	8.7	0.100053592	0.369056325	0.138065718	-0.496367988	-0.275477373	0.137638436	3.01727251	-0.544131069	8.7	0.515503634	-0.435360784	0.238903837	-0.715817626	0.853367673	-0.296401714	0.751545332	2.966602696
8.8	0.962802962	1.759815385	0.284976845	1.266856627	14.79276778	3.920773934	8.727269442	5.13090203	8.8	-0.73099216	0.400828454	-0.199220075	0.863181226	0.122955332	-0.4736654	-1.000530703	-1.0698388	8.8	0.162722149	0.321154581	-0.51716142	-0.391902786	-0.184437028	-0.05914236	2.991716529	-0.176363573	8.8	0.354327195	0.379644714	-0.127109744	-1.969169762	0.276447978	-1.081482378	-0.983563246	3.253166
8.9	-0.607073815	0.14508253	1.495042272	1.254355575	12.56434056	4.283775926	10.10446838	7.365847425	8.9	-0.67346948	-0.212602124	-0.086730834	0.957429176	-0.861910763	-1.361484809	-0.371491899	-3.109652176	8.9	0.055753406	0.38395909	0.108282667	0.291869442	-0.178010651	-0.337014143	2.702822825	-0.250535169	8.9	-0.812169899	0.443498553	-1.220549276	0.282299529	-0.471554313	-0.643497151	0.431099422	3.305619051
9	-0.134466932	0.814506955	0.169924081	2.308610975	13.9777234	5.430051631	8.128594411	6.854696379	9	0.626845835	-1.066562061	0.679500222	-0.776408113	-1.273291166	-0.738879213	-0.33090875	-0.515387596	9	0.020097158	-0.014157627	-0.599064812	-0.473153498	-0.14052345	0.402535661	3.020605899	-0.264957423	9	0.486284674	-0.530811768	0.355061277	0.307143022	0.647197587	-0.471823901	0.697438413	3.829812368
9.1	0.089096672	1.122847902	0.662317726	0.541795601	13.84252192	2.780665739	9.004844423	7.402485874	9.1	0.053132791	0.326571068	0.24584605	-0.301918433	0.126013923	-0.252114838	-0.632160584	-0.806789507	9.1	0.202700367	-0.052479022	-0.028932107	-0.414062071	-0.067691174	0.077090499	3.149496936	-0.035231508	9.1	0.473628341	-0.351271944	0.328949572	0.095746404	0.892786036	0.214793112	0.017964899	1.851956288
9.2	0.765540958	0.668450717	0.82805807	1.287691714	14.81098641	3.979805812	8.685386827	5.036178234	9.2	-0.670441971	0.295899539	-1.170866265	0.612936669	-0.127849077	-1.486005928	0.313738957	-0.928075708	9.2	0.333439942	-0.445273322	-0.075734046	-0.590281149	0.126171207	-0.145639413	2.952826992	0.063663953	9.2	-0.526446644	0.445099405	-0.403178393	-3.314420584	-0.519271138	-0.310716349	0.172786474	3.23053141
9.3	-0.330907011	-0.01963645	1.424240571	2.014419547	3.898021648	4.22826834	9.801435342	6.608057063	9.3	0.473956607	0.144156186	0.80829225	0.599936951	-0.080440926	-1.343696078	-0.137358349	-3.434132142	9.3	-0.114964387	0.022034802	-0.270387563	0.108263936	-0.303325008	-0.198618858	2.642821825	0.287208902	9.3	-0.479127718	0.230333108	-1.180525428	-0.033179879	-0.151379587	-0.96818053	-0.080545186	3.350113661
9.4	0.266632475	0.429892194	0.198888413	-0.15576311	1.552611594	3.980686884	1.167046758	7.02001621	9.4	0.420975191	0.904487245	0.384419751	-0.67403534	-0.127849077	-0.009541229	-0.110823214	1.587431599	9.4	-0.118205864	0.14125692	-0.363991439	0.224336382	-0.026990785	0.008974069	2.500597232	-0.158850835	9.4	0.678879707	-0.092228274	0.297064266	0.244863099	0.709811667	-0.914556213	0.507426654	3.791857849
9.5	-0.041589406	-2.77766508	-3.889105227	-2.037588164	-0.939506447	-0.360358773	-11.46918466	-2.782109356	9.5	0.05918781	0.287828084	-1.444753111	0.06207365	0.801962392	-0.704918908	-1.069209877	1.89616011	9.5	0.029821589	0.001809621	0.185931337	0.080828631	0.149734591	-0.105634526	1.039461769	-0.156790513	9.5	0.706009561	-0.433955004	0.458610419	0.279729269	1.088095662	-0.428433309	-3.226623872	-14.112368
9.6	0.722800857	-0.219246642	-0.55096596	-1.643388319	-1.067995796	-8.319089323	-11.87897731	-11.42074076	9.6	-0.204205513	-1.144048028	-0.495930824	0.851806473	0.408933531	-0.937789572	0.767958043	0.311563773	9.6	0.251322523	0.052904815	0.101900584	0.154692915	0.264338319	-0.282953485	-5.342866826	0.142986354	9.6	-1.01101571	0.238239637	-0.977591972	-2.867717274	-1.002850169	-0.046083088	-3.297943253	-15.38088404
9.7	-0.758308018	-0.210320983	0.772543101	-0.667472846	-3.443130998	-7.490880897	-13.14613173	-13.04623683	9.7	-0.048288776	-0.354659732	0.666457991	-0.704909668	-1.002605919	3.253882391	0.992726251	-0.721731652	9.7	-0.391570431	0.097613109	0.328464513	0.29397985	-0.083757117	-0.107796952	-4.787302011	-0.004326676	9.7	-0.0487728	0.028224552	-0.172203149	0.344041589	-0.643677572	-3.0491958	-2.343585579	-9.622279093
9.8	0.02827422	0.046088857	-1.110943046	-2.902660974	-1.955914729	-8.512925338	-10.39748244	-13.03819424	9.8	-0.037692493	0.818929822	0.41376477	-0.626911365	0.343173838	3.580548184	0.577529423	5.720613299	9.8	-0.268394302	-0.187668388	0.613530866	0.323525563	0.172226911	0.68905715	-7.878464641	0.376832914	9.8	0.532730487	0.022871735	2.514362683	4.661494825	1.457798116	6.61769323	7.12198203	19.7556405
9.9	-0.620224616	1.753323997	-3.513373476	-1.285024823	-0.237609408	-9.038925796	-2.42089729	-10.76929126	9.9	-0.690120782	0.365314052	-1.120327621	-0.258044388	-0.228782559	3.823121793	0.79761496	23.72452596	9.9	0.076282761	0.079516895	0.479507133	-0.054237488	0.64777883	2.956361155	-2.745045751	2.796681233	9.9	0.556456948	0.087745281	5.285257907	13.96030106	4.023230955	31.82076325	29.5690863	88.03832671
10	0.372660801	-0.448879505	0.523932584	-1.72756207	1.581377866	-8.028335301	13.67598788	0.392925026	10	-0.397966119	-1.158576647	1.039791846	0.67631029	-1.05613125	6.74047373	0.341834983	44.90708217	10	0.114099993	0.106128975	-0.275705965	0.037565264	0.909118173	8.265117793	3.216164714	12.19793102	10	-1.60282061	1.714284021	6.732937132	22.48555289	8.734547505	63.36445598	66.37491303	178.3022052
10.1	-0.209262109	1.592662135	2.254551423	1.131845264	2.336013071	-3.828261291	25.94266681	14.80881432	10.1	-0.261728193	-0.424074244	-0.099773065	-0.890155639	-2.822467181	17.87460238	4.180064309	56.50487823	10.1	0.102214577	0.107193458	-0.014040582	0.004853939	2.494291235	17.49327215	13.62522709	25.81975066	10.1	0.651930343	2.1125889	10.6842253	33.8707512	15.99837491	94.80097529	103.0493468	233.9358567
10.2	-0.187892058	1.463645791	-3.216489072	-2.369282748	4.645944723	-0.046696858	39.56929889	28.14699703	10.2	-0.008931153	0.063441636	0.108902627	0.408191122	-0.673807456	24.42085551	12.30762027	66.54958085	10.2	0.574389738	-0.134444228	0.075308574	-0.008863714	5.109826788	30.64839272	25.76209603	38.30324233	10.2	0.653554495	1.874126526	14.11139945	38.96898264	24.38720744	134.6904748	137.1972953	270.6780775
10.3	-0.136932707	2.457639634	1.004257757	0.540962198	6.25493821	2.384182981	50.0243494	38.76231744	10.3	-1.120027126	0.434728565	-1.23444714	1.76828654	-0.869557238	27.54843791	27.71829051	73.58733079	10.3	0.211344305	-0.738006202	-0.393774491	0.115650364	6.661796901	46.40491217	41.38124524	53.83807104	10.3	0.80239932	2.389846717	16.53982133	37.81632894	28.29948595	187.0776266	186.8102266	307.9395349
10.4	0.672663432	-0.085361757	0.540023879	-0.840820769	6.090970459	7.855645033	59.91193154	43.49940083	10.4	-0.317737118	-0.998761839	2.218483449	2.127403729	-0.897084552	33.9022493	42.46870415	82.07263941	10.4	0.201619874	-0.733748269	-0.354418316	0.062890162	9.818219208	66.20625006	59.15820819	65.91670942	10.4	-1.023583298	2.489564475	15.35674027	30.24677346	26.43910226	232.3002218	238.0028503	312.4557411
10.5	-0.110631107	1.07903103	1.495042272	0.929328218	5.088945313	9.961409012	66.30108345	25.50992232	10.5	0.115196735	0.291056666	1.734290633	1.037052444	-1.410927732	41.19077767	54.36737115	86.14596558	10.5	0.450133117	-0.557044058	0.134874677	0.314028727	13.84113139	81.89249065	76.88405918	73.07838908	10.5	0.914275946	2.285650974	15.31315319	27.91057061	27.54677487	261.6153198	267.2186154	288.2712599
10.6	-0.247892584	-2.776853657	-5.04285112	-1.292525454	7.628048266	10.8750815	74.98063956	5.796649459	10.6	-0.108838965	0.747901018	1.594086653	4.564850714	1.162876054	46.93330358	65.80869728	88.6063428	10.6	0.426362285	-0.718845504	-0.252304995	1.022070648	17.87046994	94.11452426	88.49980833	77.20109362	10.6	0.843341399	0.813092575	15.34153717	27.51987377	29.4612186	270.9340349	295.9856424	255.1714089
10.7	0.31512605	-0.061830474	-0.147879006	1.995251267	7.199430811	13.30508027	80.38349694	51.28462445	10.7	-0.720395877	-0.235202198	3.780290581	4.6574737	2.213501841	53.01058106	78.40039959	91.315593	10.7	0.339922896	-0.235570132	-0.145936954	0.476530151	19.1064765	102.6452961	98.17996967	79.35103974	10.7	-0.420452204	1.687996743	14.66956616	25.90870991	33.36026476	311.106879	313.0684151	264.2670629
10.8	0.558415855	-0.013145061	-0.276609371	0.130927686	8.870751222	22.1290243	87.9814961	52.11211723	10.8	0.352856228	-0.616174873	-0.719279025	5.362708361	2.190562414	70.6165736	85.0654013	98.35806837	10.8	-0.347270244	-0.433564007	-0.021486344	0.662246065	21.42318551	111.8777753	110.6879559	83.5685191	10.8	0.068761649	1.635643817	11.72083202	22.02828884	34.43479149	339.0849284	347.7215383	262.5374403
10.9	-0.240495259	0.356864075	-2.423992765	2.850323236	6.572326079	20.19595059	85.78963923	49.45627648	10.9	0.230242095	0.342713978	2.971672275	3.328252611	4.957057391	74.75164505	90.7173852	93.57435159	10.9	0.660829127	-0.371823981	0.129556275	1.061113198	25.13656052	123.3462034	123.5448369	89.91328104	10.9	0.332810915	1.877255661	11.06332563	24.6784158	42.64193774	334.7377176	352.6143272	237.3407755
11	0.090740522	1.436868814	-1.221972986	-0.059088307	11.33506187	25.37577755	86.45976107	41.94181993	11	-0.13608655	0.550957517	3.002647573	7.275291762	7.552271309	73.22181416	96.65501202	94.96835533	11	0.124904917	-0.812520026	0.023188233	1.834577771	26.65104343	133.6598957	137.6839614	96.77930448	11	0.544266877	0.8199522	13.18337089	28.64103814	46.52818811	316.106434	344.4454445	191.2362282
11.1	-0.150083508	0.288704497	0.251989689	3.167016557	13.24226571	33.18648787	86.76197288	36.09485963	11.1	-1.153329731	0.228099318	3.550421264	5.832323147	8.769590271	73.84441976	104.9792402	93.3806087	11.1	0.028741097	-0.59110752	-0.022550025	2.331578881	29.57718722	143.8438425	146.2829936	97.32528984	11.1	-0.764272184	1.754957479	14.48960663	29.76422015	50.88341356	336.9181833	346.4081394	203.6179562
11.2	0.663622256	0.840472508	0.250380559	1.968582356	14.99029618	34.3318825	89.66911913	33.02705973	11.2	-0.298058307	-0.687203677	3.58465712	7.314290914	8.934754151	79.1373759	108.0260981	94.57141867	11.2	0.001728788	-0.542141293	0.110410028	3.989304452	34.31021408	152.6168062	151.1775196	108.6261566	11.2	-0.821297458	2.425794125	13.26670994	27.47495777	46.70864339	333.8792934	360.3187566	196.994931
11.3	-0.260221459	1.081465301	-2.84236645	1.66522349	12.19613228	31.28248956	81.42070759	28.22384841	11.3	-0.25113191	1.563117971	2.596708141	8.508639937	13.39417889	82.54634369	112.1390441	91.09034719	11.3	0.084926699	-0.149346993	0.424195751	4.658303823	41.12110294	160.5258805	156.177603	111.3334199	11.3	0.426670393	2.258557486	15.96389726	27.87238877	56.37869663	351.5045105	356.217952	179.3768388
11.4	0.136768322	1.837712045	-0.994281154	0.758480505	13.76293523	36.96364694	83.19455953	24.67885506	11.4	-0.556910366	0.205499244	2.802123275	9.496618449	15.94657254	78.77028118	115.983517	93.03880213	11.4	0.376659636	0.108257941	0.613530866	5.083551057	50.20050297	164.9772351	159.0420951	111.1273877	11.4	0.365722663	1.253072318	17.69307327	31.48527698	60.42585565	318.7666911	318.0726325	121.7107076
11.5	0.054575821	0.117494129	0.08544478	4.170434345	13.20966393	43.2412906	84.08559164	18.84083096	11.5	-0.643194386	-0.227130743	4.002008504	8.232395945	16.70663225	89.40309103	116.2192114	91.1911565	11.5	0.293461725	-0.619848567	0.499717061	6.260103579	57.23952822	171.1401501	160.3398946	108.1213777	11.5	-0.266404961	1.459939582	18.71455902	31.50545797	66.03299833	327.1175183	323.1290387	146.1837584
11.6	0.818144159	0.692793423	-3.066035459	3.136180629	13.01405328	35.38740771	88.45041714	17.26537765	11.6	-0.293517043	-0.028572951	4.504134387	7.369539713	15.90069369	93.70796402	121.4965817	96.06780686	11.6	0.305347141	-1.164863964	0.818821187	6.686406017	60.10783461	175.8380213	156.0098224	101.6416647	11.6	-0.400696381	1.590415232	15.37635356	25.19608067	64.16051273	315.8509972	322.2179039	136.294135
11.7	-0.254467984	-3.399215516	1.080691411	2.936163794	9.191015718	38.7460572	83.77188264	12.50952823	11.7	0.293819794	0.486385877	5.327425203	7.873278756	19.40125035	95.45772831	119.6391222	98.08241791	11.7	0.524687089	-0.900872131	0.890087775	6.863680298	60.4773513	179.7433632	152.4242071	94.2286257	11.7	0.651197464	1.640283705	4.924796666	29.89203291	75.63940387	332.1568229	308.8841162	115.2255019
11.8	0.094028222	1.025477076	-0.565448126	2.344447324	12.11175121	44.37611235	90.54044177	9.363089711	11.8	-0.634111857	-0.165787685	3.845501735	9.238249068	20.91372328	100.1685078	123.7224113	101.0562925	11.8	0.265368923	-0.089735934	1.480430408	7.242498554	58.5558645	182.4788325	153.5297811	84.52450856	11.8	0.63821479	0.870894899	7.262471655	31.49309145	79.633639	286.6426645	269.9615071	94.94473556
11.9	0.121973672	-0.055339086	1.311601502	5.283861392	10.88822577	42.76374914	90.45174917	5.139838237	11.9	0.210563283	-0.669446476	4.988327203	8.989629476	20.243892	110.0541909	122.8514345	100.7648906	11.9	0.523606597	0.132741055	2.093110329	8.253384039	56.8014635	186.0954906	151.3086329	76.96106609	11.9	-0.729851117	0.680727595	17.42534019	33.04362515	78.03337686	294.6587517	288.6783591	95.76715397
12	0.754855933	0.508600278	-3.340392048	3.772067482	12.34571689	39.71876156	95.36926095	2.050591443	12	-0.169389155	-0.588731926	5.166027597	8.73288506	22.52101252	109.9329041	127.996129	105.5123791	12	0.522526105	0.116773807	2.473907919	10.33741205	58.10387596	188.7336507	148.6230326	67.52170034	12	-0.689804244	1.530707313	17.43132889	28.16828392	78.31816407	281.3322715	280.3132226	87.36666546
12.1	-0.826527794	1.113110819	2.130648447	4.825489479	6.85327667	47.16206453	85.38395272	-4.850841299	12.1	-0.379801062	0.365314052	7.79729765	10.06210615	26.0139227	104.9941055	124.7822558	110.3827288	12.1	0.15840018	0.005003071	2.734509622	10.98425213	55.98102933	191.9513411	147.0274505	59.50910765	12.1	0.209333554	1.505221159	17.96848137	30.76800461	88.1192002	286.804199	272.9987187	77.54225684
12.2	0.172933023	-0.00827652	-0.702224139	2.512794827	8.975268677	42.49149765	87.63329553	-7.729193606	12.2	-0.967137899	0.623600611	5.170918434	12.62630038	28.12587934	100.7959649	129.4649268	115.6515904	12.2	0.255644492	0.375443224	3.508868967	11.31875182	59.14602014	190.7749812	141.0673511	56.53812317	12.2	0.220571314	1.095712105	17.38366451	34.29242872	91.47492594	254.0103174	239.5117195	45.76944932
12.3	0.132658697	0.090717152	-2.598583322	6.686479445	9.123894416	39.91964616	86.33247077	-7.68451257	12.3	0.342259945	-0.564517561	7.443527141	11.25808014	27.56309872	105.3725203	130.4841882	119.6020552	12.3	0.175688058	0.468053262	3.484404318	11.42532743	64.68341523	191.5091249	134.3327944	53.06854074	12.3	-0.140150177	1.119814716	18.65693129	37.16179184	88.99384186	249.8574388	254.2713603	38.74456187
12.4	0.659512631	0.272476026	-0.030412549	3.02867158	9.774012166	40.80776754	82.6640464	-11.13388851	12.4	-0.092187663	-0.362731187	7.523410804	11.61232243	31.16153027	109.407328	129.3900041	124.8110613	12.4	0.06223636	-0.138702161	3.257840388	11.96770231	71.26402557	190.6592914	131.7416401	46.33025727	12.4	-0.743479234	1.615274744	16.76968145	35.80441923	91.27747822	236.4855528	248.0039324	51.04374368
12.5	-0.580772215	1.391429095	1.923875299	5.895579545	11.74450181	41.80249872	79.47193413	-11.62180542	12.5	-0.460030063	0.32979965	6.879450661	11.0712092	32.76729021	101.2487689	131.183467	130.3587236	12.5	0.341003388	0.340315279	3.607791246	12.67679944	76.31301598	190.6441544	129.6760502	41.42153984	12.5	0.402058275	1.175368708	19.76927576	33.88644128	98.50180122	233.4118445	244.3020536	50.31588563
12.6	-0.260221459	-0.561667378	0.121650195	2.896160427	8.98581631	36.20768648	78.32467896	-13.6145796	12.6	-0.920211502	0.400828454	5.651850693	13.95714643	32.54248382	107.7400387	132.9004464	133.491688	12.6	0.35072782	0.195545564	4.465117664	13.45131922	80.48266378	191.6269771	130.2238371	36.21922651	12.6	0.530504455	0.956110322	18.70931768	39.57807889	104.1807426	214.0788009	207.1973957	47.29492955
12.7	-0.083507581	-3.258027819	-2.819034072	8.554970043	10.74247666	43.57874148	76.32006202	-15.45811913	12.7	-0.625029329	-0.556446106	7.88207215	11.64482173	33.13432105	111.4303919	139.0644023	134.4840296	12.7	0.599241062	0.364798392	5.286278948	15.33380325	80.66795765	193.274746	127.1160075	26.40694246	12.7	-1.438496532	1.063706139	19.89667695	40.70180754	96.29631804	204.1948381	222.9280049	44.30590195
12.8	0.424442077	-1.190520626	1.091150753	2.899494041	9.954280805	41.44830746	68.03469523	-16.70203915	12.8	-0.664386952	0.478314422	7.893484102	11.22395588	37.45763852	118.1092519	138.1934255	136.4120076	12.8	0.216746767	0.38395909	5.135236329	17.33552534	80.19561892	193.3277254	122.6770446	27.47212899	12.8	0.533124169	1.564303962	18.43661841	39.54780815	106.5128752	191.2516554	223.0189451	33.92432519
12.9	0.594580555	0.823432614	2.325353123	8.289947737	9.947568675	41.82804983	67.47215422	-18.8788992	12.9	-1.065531956	1.051387725	8.004343063	11.9356904	39.4625445	111.7635263	138.8630475	134.9266455	12.9	0.371257174	0.372249775	6.427608038	20.1603066	78.82358738	192.9730875	115.9358212	24.30232343	12.9	0.640818652	1.463947745	21.08970967	36.10297394	88.81329572	190.6595205	218.4109396	33.24529434
13	-0.205974409	-0.801037324	-3.074885671	4.651308152	6.087134956	41.92672999	68.90355419	-19.29532645	13	-0.796083614	0.726915235	6.297441114	14.43163611	38.30333876	119.0019228	138.0029969	133.5798961	13	0.360452251	0.192352114	7.191330579	21.92460778	79.41374302	195.9712916	111.109074	19.83451493	13	0.933204527	1.031103526	20.48636099	42.02596502	111.0340105	170.340821	196.0575212	30.39319633
13.1	0.31841375	-0.118630122	0.00981569	11.22602819	7.966531401	48.59733211	71.48303056	-19.67064715	13.1	-0.05585755	-1.207005377	8.692320735	13.61752882	40.22719209	116.8478692	141.3074017	128.9883471	13.1	-0.159264574	0.262608005	8.110350461	24.08566569	81.2666818	198.8635368	107.4801247	20.15180453	13.1	-1.275179498	1.139068898	22.39772575	42.999001	102.2878033	162.3219987	202.4794565	30.15829168
13.2	0.57732013	0.04203174	1.449182079	4.503795736	8.568705364	39.92757582	62.06108456	-19.34358197	13.2	-0.397966119	0.839915605	9.271069724	13.65165308	42.60524609	111.6584111	138.115381	127.915673	13.2	0.168124611	0.734174062	8.05716644	24.48875364	83.97218664	203.5938444	105.3234221	19.21744846	13.2	0.26164046	1.265892849	20.45911373	41.12898151	114.2378098	152.7954311	199.7894863	29.56559491
13.3	1.205270841	0.08341434	3.192673955	9.9342528	10.34741986	41.47385857	64.41965067	-19.41417801	13.3	-0.516038988	0.368542634	9.27596056	16.83820877	43.76292254	110.3760053	136.5326382	123.3225488	13.3	-0.01555909	0.369056325	7.023269073	24.56050751	85.15464006	206.9661483	103.2844992	17.00260219	13.3	0.33139234	1.143084307	21.36530523	37.9290564	119.9095201	145.1839178	195.9575947	27.08595234
13.4	-0.60789574	-0.201395324	-3.823130916	5.593887486	8.944584653	43.51706638	61.94364899	-19.30962438	13.4	-0.148196588	0.312042449	9.230312753	19.3471542	39.93050883	115.8484659	139.0238192	119.7926479	13.4	0.429603762	0.233866959	6.678636617	24.33680425	87.62772425	210.8671654	101.7333622	14.71358432	13.4	0.500911972	1.070995433	21.56798849	43.03989588	121.9170249	140.5670025	174.8901362	30.30515171
13.5	0.283070975	-0.036676344	1.622968072	9.710900667	13.71882695	42.97432554	65.00600728	-20.04864871	13.5	-0.028609964	-0.19000205	9.779716723	17.16157674	43.01815579	116.8316976	140.122686	113.6338291	13.5	-0.163586543	-0.036511774	5.905340952	22.93232765	88.60239147	214.7400709	97.20773124	14.34787715	13.5	-1.619004096	1.439348242	23.15732504	45.25386496	112.2174894	126.5291452	179.3107109	24.20628534
13.6	0.117864047	1.008437182	1.401712758	4.343782268	14.01128405	37.65969444	57.95330335	-20.92618425	13.6	-0.774891048	0.860901388	10.38291989	16.79433472	42.47984389	106.9346943	136.4951768	114.813613	13.6	0.635977802	0.531922254	5.514970238	22.60099358	91.76309803	217.6647526	93.97878854	15.88384728	13.6	0.436401142	1.689404809	22.96516203	43.89803924	123.9955019	118.366358	178.2050732	22.50834468
13.7	0.998967662	-0.127555781	1.411367535	10.04342866	15.14179854	41.64478669	57.17231576	-22.12095514	13.7	-0.158792871	0.60422912	8.521141456	17.30782355	42.29785776	113.7348412	135.1762245	111.7042759	13.7	0.136790333	0.187029698	5.683031744	22.46065144	94.3636387	218.8097573	93.10321839	14.21498637	13.7	0.415641519	1.932630086	21.79453486	45.34967201	130.5728827	112.1952372	172.0295395	28.9743058
13.8	-0.612005366	-3.150108487	-2.37250062	5.490545454	9.905378142	40.462387	55.52493289	-23.81615362	13.8	-0.105811456	0.21518499	9.513981271	18.31367668	38.66272312	120.6061429	134.898386	110.2504166	13.8	0.454455086	0.077387929	6.110631273	23.73955876	95.23012857	219.6866212	93.12655211	11.93111931	13.8	0.240510934	1.164399506	23.49194357	43.32024856	129.0039187	114.5102302	144.9246286	22.89224702
13.9	0.486908378	-0.598992861	2.03007785	7.91908319	11.54889116	38.57601015	53.79214233	-23.14236361	13.9	-0.1678754	-0.223902161	10.53127527	14.62013201	43.4922373	125.7406177	135.3713358	106.3913102	13.9	0.386384067	-0.006706244	8.015682904	25.25272137	96.62679457	219.1135782	98.75331256	11.28623849	13.9	-1.88185291	1.41068898	25.18292644	48.42289083	69.11117602	99.6117948	157.5975403	18.88909255
14	0.208275799	1.135830679	2.012377425	4.52379742	9.341559209	38.93548785	46.4791092	-21.65984685	14	-1.263833826	0.552571808	11.69692464	15.27011787	45.11787807	117.7971405	134.3708051	103.14021	14	1.102750501	-0.492110583	9.052771313	29.14536913	97.12912306	219.5125459	103.0178281	7.648739804	14	0.1673101	1.303924022	25.20265808	45.33822785	115.8609416	90.24636988	153.6101536	28.7969347
14.1	1.321162268	-0.821322912	-0.954052915	10.27761503	10.25824441	40.23771344	38.78666885	-20.34443717	14.1	0.302902322	2.066776761	10.12696612	16.69358691	45.03682543	122.0939277	135.1231542	99.04483179	14.1	0.54305546	-0.573011306	9.631413461	31.44149316	95.19371243	219.9201632	107.2578987	6.001512276	14.1	0.352887151	1.566327488	23.35491527	48.69143298	132.7345204	81.53023135	146.4396262	26.45293506
14.2	-0.692554017	0.093151423	1.561821148	6.890663297	6.35178466	37.09668893	33.92007319	-20.68401304	14.2	0.101572943	-0.422459953	11.60562903	17.8619365	43.27813597	119.404595	139.3438017	96.06938201	14.2	0.680277989	-0.410145376	10.0962418	33.38728943	94.13121806	218.6843366	108.4056957	6.311590754	14.2	0.160594056	1.234989067	24.75924055	44.50964211	138.4747647	90.9409659	125.8782049	21.93041924
14.3	0.179508423	0.302498698	3.326231708	9.955087887	7.741195603	35.00942748	24.96540578	-20.19967061	14.3	-0.525121517	-0.357888314	13.35980906	15.0897468	47.87519728	115.592955	139.9478663	92.21815135	14.3	-0.136574234	-0.307954989	11.090783	33.65847688	94.25546135	219.0897915	106.4267738	3.753700854	14.3	-0.9467504	1.161390076	26.02229441	49.63649236	140.0777901	85.59820321	134.8319098	25.9505916
14.4	0.371016951	1.518011168	3.339909309	6.59897208	8.584047376	37.82445506	24.320742	-21.90827341	14.4	-0.505442705	0.663957886	14.21407518	17.61169195	49.81740216	111.8460013	136.8214029	89.37501378	14.4	0.368015697	-0.673072727	11.33755685	32.21917854	95.72817281	219.0746545	106.7734462	3.577543313	14.4	0.418411017	1.00418592	26.50566956	50.55210331	141.5461808	78.3877677	130.771883	27.91696838
14.5	1.320340343	-0.413988293	0.483704345	12.97534209	8.206250336	32.90806886	20.01175998	-21.96367789	14.5	-0.014986172	0.065055927	12.932676	18.87916438	47.46075829	117.9879651	139.4280898	85.41352294	14.5	0.321554526	-0.389920196	11.24927138	31.18718898	98.41332745	218.2280646	109.7034951	3.154147119	14.5	0.405869517	1.44667299	24.79805956	49.62927708	143.7386697	68.35656649	125.2648199	25.0928374
14.6	-0.540497889	0.191333672	3.600588298	6.918999016	11.2506808	33.54772771	19.13797365	-24.3416026	14.6	-0.33741593	-0.803432628	14.70641939	19.18790766	48.96711404	117.5804415	135.4634283	84.73463524	14.6	0.553860383	-0.386726746	11.00781592	31.04684684	103.1559939	219.964493	106.9534492	4.389310225	14.6	-0.683596029	1.276550449	26.18730265	48.25539188	133.0186933	72.25531391	103.8774339	28.85119818
14.7	0.626635631	0.331709945	4.258722287	11.91191925	7.244497971	32.60674197	13.33189345	-25.38713883	14.7	-0.575075423	0.505757369	15.38461538	16.0598507	48.52514773	112.4103893	134.514407	83.57375304	14.7	0.324796003	-0.489981616	11.3077738	31.32964153	105.5059058	221.3214155	107.6123491	2.345470691	14.7	-0.397712069	1.666318597	27.49727532	51.03716465	147.2518145	73.8565324	113.8921373	24.17293778
14.8	0.203344248	1.476628568	-0.02558516	7.504048257	8.962803292	33.12657492	13.91742883	-25.77675746	14.8	0.213590793	1.082059254	15.02269348	16.45309215	47.64121512	115.2145402	127.7245341	81.9891567	14.8	0.662990111	0.106128975	11.04079002	30.91916715	106.7633337	220.4748256	106.6990005	1.884988699	14.8	0.271071891	1.056295354	27.60734221	53.22247749	148.4922235	64.2101206	110.738997	22.98659799
14.9	1.569383622	-4.669904788	5.953135711	13.32870517	9.245671635	29.29302719	10.84932195	-26.22982316	14.9	-0.116407739	0.827001277	12.87235569	17.50119435	44.30123445	127.6456291	125.9903849	79.82018139	14.9	0.088168176	0.287091119	10.77699727	31.30748224	108.6698256	219.4995713	104.808969	2.494844044	14.9	0.362108074	1.198181058	24.38212703	49.3446104	150.5840551	53.40870482	101.2463473	28.10181413
15	-0.816664694	-0.562478802	3.738168875	6.843159299	10.79425595	33.57327882	9.464731964	-26.40765368	15	-0.140627815	-1.060104897	14.6053421	16.35071937	45.47114526	126.0446432	121.0314363	79.2972331	15	0.654346172	0.311574232	10.83018129	33.24272648	108.7362315	220.71053	104.620077	1.367847849	15	-1.401582131	0.930431383	25.17919935	51.05085949	141.5906522	58.36009524	103.0529987	23.4971798
15.1	0.642252206	0.634370928	4.941797784	12.51113635	7.960778147	30.0859927	6.353921239	-25.52922452	15.1	-0.726450896	0.851215642	18.02240655	13.32503518	46.95609088	121.5263055	116.3846658	78.33639437	15.1	0.567906784	0.369056325	10.42066433	36.19413222	109.0907533	222.5248057	110.7979577	1.783002755	15.1	0.089887867	1.459100841	27.01267057	51.33750648	152.5924519	62.86672264	93.45459192	21.56557446
15.2	0.241152799	-0.898408149	-0.801990171	7.755736108	10.22660151	27.73264727	6.068955209	-25.86790677	15.2	0.305929831	1.128873693	16.57471894	16.275971	47.60909992	122.9219123	111.1291481	77.57559911	15.2	1.26698534	-0.084413518	9.721826297	38.67491696	107.5644887	222.5075063	120.3592282	0.921788112	15.2	0.049768723	0.807526511	27.8049827	54.44200781	153.9501147	54.50736665	94.89956158	24.61956859
15.3	1.330203443	-0.431839611	4.710887692	14.52130554	10.26879205	27.61898888	3.78922697	-25.65969315	15.3	-0.154251607	0.232942191	14.25646243	17.05920396	47.12278405	121.4616192	105.3054662	75.78150842	15.3	0.700807344	0.06780758	10.19516408	39.07167368	107.3556314	222.5053439	131.140519	1.208172886	15.3	0.050919373	0.914848851	25.53202429	51.96946737	155.4906288	50.04924807	84.72596229	22.71065727
15.4	-0.221590984	-0.154332758	2.166049297	6.319781915	11.88162104	28.019877	1.384672113	-25.38535159	15.4	-0.47516761	-0.930961617	17.34095	16.84308366	50.28842507	115.418302	102.9329129	73.3762613	15.4	1.039001452	0.0411955	10.76955151	37.96793024	108.6398358	224.1931176	140.6784558	0.30472164	15.4	-1.143049767	1.685742179	28.19069016	53.36732896	148.9332869	51.61458876	85.73197427	17.00122041
15.5	0.278139425	0.885912227	-0.725556517	11.85774803	8.684729329	24.40395425	-0.525503638	-25.8777366	15.5	-0.272324476	0.202270662	18.61745833	15.87297976	50.36947772	113.9014084	94.36362501	73.77319795	15.5	1.100589517	0.321154581	11.53433773	36.55923282	111.0711486	227.0291398	146.8396696	0.350048727	15.5	0.413815408	2.410082857	27.40005012	53.75365479	159.9091978	55.55887016	78.71011608	23.78781285
15.6	0.914309386	-0.637129768	3.203937862	6.373119738	10.64275358	20.89376024	-1.610345499	-25.66862936	15.6	0.416433927	0.602614829	15.74490701	18.24055327	49.47331074	119.9026795	95.32201168	73.32743179	15.6	0.458777056	0.198739013	12.43952977	36.04851406	114.5628136	228.0325056	152.6953227	0.712665418	15.6	0.10691245	1.662533714	29.22253722	57.45912881	159.608705	49.35934697	79.44791795	18.75588535
15.7	1.280066017	0.141025412	4.585375587	10.95600546	9.380873114	21.47791151	-1.655513025	-24.9930521	15.7	-0.010444908	0.32979965	13.34513655	17.67994046	49.77916978	120.4897076	88.30424874	72.45952664	15.7	0.933113201	0.046517916	12.75437917	37.12060138	118.0823262	228.2887531	160.4865637	1.097945653	15.7	-1.412057617	1.607223214	26.62595982	54.62989539	157.0561195	45.14807343	71.73139128	16.38478089
15.8	0.057041596	0.029048963	2.280297496	4.705479378	10.12975506	20.69904315	-6.652683895	-23.81526	15.8	-0.56145163	-1.01651904	15.54112215	16.31009526	51.25952751	117.3200791	85.33075266	71.4813613	15.8	0.588436139	-0.194055287	13.22452592	37.97848228	120.1334116	229.7797461	166.0044334	0.011125739	15.8	0.564162624	1.766548113	30.645275	57.35578688	154.4144364	46.42625447	71.32568642	22.39153258
15.9	0.412113202	1.169910468	-1.235650587	10.74348758	7.642431402	15.30687765	-6.774225603	-25.40501125	15.9	0.53904806	0.846372769	15.3911365	14.30976376	52.90810771	122.8200314	82.92542066	74.04412297	15.9	0.431764747	-0.104638698	13.53299324	39.24789276	119.2754902	230.9852987	170.5467313	0.058513148	15.9	0.715355554	2.005465567	29.27185167	53.31005795	165.9298049	45.17524653	68.50242401	22.92395451
16	0.366907326	-5.204632904	3.946551153	6.967336417	9.145948558	15.77737053	-10.04681819	-25.82858746	16	0.785790082	1.647061103	15.25419308	16.85445842	51.27482046	132.4776954	83.84010239	72.9745992	16	0.341003388	0.294542501	13.30430195	40.4824815	117.9238089	229.6467568	172.1489803	-0.132066647	16	-1.095801114	1.80366023	31.99161819	59.01282627	167.2193438	46.65013945	65.19581613	15.6823962
16.1	1.590753672	-0.534078977	5.42775491	11.49438411	10.01660773	16.88047366	-9.770885669	-26.89199611	16.1	-0.307140835	-0.291702383	13.51305527	16.17684815	52.77047115	129.17546	80.00031218	72.80763378	16.1	0.056833898	0.214706261	13.28196466	43.28193786	116.5507063	230.9928672	173.1878865	-0.477170601	16.1	-0.187372743	0.932426314	31.90591846	55.93232106	157.9700196	40.02656568	59.17878037	17.69679767
16.2	-0.476387738	-0.067510439	-0.346606507	6.326449143	9.329093824	12.15087491	-13.53539368	-26.39424937	16.2	-0.157279117	-0.501560212	14.99660902	16.41084306	55.04606237	122.8038598	82.14497549	75.21288091	16.2	0.000648295	0.215770744	12.9756247	46.2322884	116.6417466	230.9355629	172.8012134	-1.037578215	16.2	0.744848056	1.491341781	30.09310787	57.97067104	152.9639059	43.88378499	61.53390759	23.86971229
16.3	0.748280533	0.614085339	3.812188835	12.12527054	7.258881107	11.23103491	-13.84746023	-27.90804285	16.3	0.59657074	0.550957517	15.38298511	15.40661491	55.58590357	126.2435536	75.78590828	71.94287892	16.3	0.686760943	-0.066317303	12.94690533	46.86752124	117.908814	231.5323926	172.0245337	-2.073920237	16.3	0.736606842	2.07081211	30.78955892	55.6883653	167.872026	43.22509317	56.05758303	21.19627523
16.4	0.422798227	-0.712592157	4.37538418	8.194106337	7.085324599	12.7112372	-14.82964862	-28.18685252	16.4	0.172719415	0.447642893	12.8250776	17.99355864	52.19698545	123.3520762	80.67617769	71.640451	16.4	0.776441809	0.088032761	13.2692005	47.26849878	119.0270036	229.6099956	174.6379106	-2.297465186	16.4	-1.290711925	2.692288481	32.70716283	61.14548421	168.1924626	44.78319594	53.82793216	22.40551786
16.5	1.527465446	-0.117007275	5.579817653	9.689232177	8.295425779	12.23017146	-17.14058352	-29.02417512	16.5	-0.611405536	-0.120587537	14.62327516	15.91360388	57.72079964	120.3894438	74.94146661	70.45751675	16.5	0.718095222	0.133805538	13.24367217	46.56362247	120.531847	229.2748195	174.3012384	-2.629177046	16.5	0.53292452	2.494455342	30.37888226	59.69323797	163.7834247	38.67306084	50.30274208	22.77037557
16.6	-0.770636893	0.218922073	-2.452957097	5.258859287	9.45374767	6.495268639	-18.71077098	-29.02060064	16.6	0.34074619	-0.244887944	15.4449357	15.53011222	57.60304391	113.6361946	75.97477601	72.01376047	16.6	0.456616071	-0.715652055	13.21069807	47.0912245	121.4936614	226.7145067	172.0678678	-1.975024775	16.6	0.652125685	1.631057046	32.80486008	60.353477	156.1681734	42.83395998	52.34502681	15.88786626
16.7	0.204988099	0.57757128	3.652885008	9.697566212	9.736616012	8.199263423	-19.69295937	-29.47724082	16.7	0.819092686	0.772115383	15.94869186	14.37801228	58.34475207	124.6328648	74.77601224	69.47462598	16.7	0.577631215	-0.623042016	12.97775206	47.6631451	121.5257933	226.0149618	168.8822591	-2.199599885	16.7	-0.444673637	2.602458841	31.90472809	58.02017955	164.4348864	42.61917475	49.24002389	21.58800057
16.8	0.576498205	-0.405062634	3.549096152	5.288028409	10.52577074	7.084706338	-20.08222132	-29.47545358	16.8	0.222673321	0.688172251	16.70840181	17.17295149	52.92951784	125.7228289	73.04186308	70.45436646	16.8	0.774280824	-0.405887444	13.6329792	46.71768227	121.17984	224.0958085	167.8089079	-2.16457441	16.8	-0.267398525	2.465400602	33.43132185	63.18481337	167.7439203	38.81040956	42.0740759	17.57950881
16.9	1.100064439	0.106945623	0.941501704	8.640810602	10.58330329	5.2626478	-21.87249782	-29.38877237	16.9	-0.348012213	0.922244446	16.06770222	15.24574341	57.97466264	130.9042012	73.47110792	69.35491493	16.9	0.529009059	-0.181281489	13.95421069	46.55412564	120.7224962	223.2978731	168.195581	-1.937938977	16.9	0.696664879	1.989063483	33.02208032	61.26188492	166.8922522	40.75272601	47.24468974	18.67742703
17	-0.730362568	1.261601328	1.820891007	4.254608096	10.45481394	1.430862218	-22.66580383	-29.35302754	17	0.183315698	1.65997543	18.42182487	14.52263413	57.67492078	130.4724202	72.55798708	71.6026475	17	0.247000553	-0.184474938	14.98172597	46.36524411	123.2791233	221.5873939	168.5478091	-1.337355082	17	0.687689475	1.754435301	31.16700273	60.5212656	156.5600442	40.1931051	47.20899904	20.40128955
17.1	0.306084875	-4.280421486	4.821113067	10.43596169	8.670346192	4.910218682	-23.41229986	-29.28779323	17.1	-0.670441971	0.541271771	18.11533245	14.64125655	55.11946854	135.4613507	72.12874223	70.53312373	17.1	0.320474034	-0.048221089	15.37422405	46.1014431	125.0517323	224.1304073	170.2089479	-1.887461086	17.1	-1.144144622	2.190250823	32.47594402	59.01825918	170.8693145	39.30279914	34.0537287	21.5108993
17.2	0.432661327	-0.352320103	4.55721582	5.713064183	6.622187617	0.878429576	-23.09612717	-29.06528167	17.2	-0.500901441	0.659115013	16.70514125	17.80018785	54.2752976	133.6080884	71.02987544	70.67016139	17.2	0.630575341	-0.64433168	15.37209668	45.9463281	126.9678638	226.4182543	171.2678545	-2.039924922	17.2	0.601858395	2.123316009	33.68965818	64.33485131	162.2222248	35.94263851	27.18548305	18.40456783
17.3	1.329381518	0.155631036	1.331715622	8.95667052	6.156174009	0.5991295	-25.87926802	-28.50319425	17.3	-0.302599571	-0.667832185	18.04360018	15.47973832	58.37075009	125.7050402	71.59647863	69.2084264	17.3	0.566826291	-0.22173185	14.63602983	45.77538504	128.0014395	227.9103285	173.895676	-1.142654643	17.3	0.63423061	1.858014185	32.838856	62.86053657	168.2341586	38.60337415	41.38584959	24.47842317
17.4	-0.647348141	0.530508714	4.181484068	4.546299314	7.185047675	-0.10396659	-25.6419332	-27.39063646	17.4	0.411892663	-0.075387389	19.53530532	16.4368425	59.29750297	121.2627088	70.15733775	69.96134593	17.4	0.280495816	-0.316470855	13.7957223	46.81159543	128.4641387	228.2368549	176.5434979	-1.431099738	17.4	-0.085832366	1.297801723	29.64174517	64.01515208	155.2868008	39.24774071	41.64140603	24.60059705
17.5	0.422798227	-0.471599364	5.134893331	11.29186707	8.665551814	-0.18590636	-26.55678092	-28.30302321	17.5	0.275654737	0.613914866	19.46683361	16.11184957	58.30193181	120.12423	69.93569132	69.87628808	17.5	0.535492013	-0.588978554	13.17985134	48.53368844	128.3302558	227.9870946	175.6057045	-1.180770602	17.5	-0.656383981	1.612841886	33.31412266	62.53366202	166.6542639	37.34255093	40.54702261	15.1095952
17.6	0.349646901	-0.184355429	1.036440348	5.620556397	7.663526668	-3.91636857	-26.04187112	-27.43621112	17.6	-0.879340124	0.809244076	16.17530062	19.43815222	59.04058138	124.7590031	70.67711423	70.28110046	17.6	0.40583293	-0.769940698	13.024554	49.67330882	129.6133891	229.3407735	176.7946132	-1.358988464	17.6	0.457783428	1.625175568	34.80432513	67.04426052	165.8843686	31.36064204	37.11141978	23.55428202
17.7	1.605548323	0.243264779	5.164662228	9.456712607	10.19783524	-2.44057164	-27.90605812	-28.54072632	17.7	0.127306773	-0.454745773	18.07946631	15.45861378	61.76425609	115.8112713	70.16826398	68.16725525	17.7	0.738624576	-0.940258009	12.77884382	50.64304135	131.1171614	231.2296529	177.306844	-1.869948348	17.7	0.51192568	1.657585907	34.13196959	63.00609788	163.9141422	36.53376274	40.33149182	24.1895675
17.8	-0.704060967	-0.24845789	3.39381515	4.685477694	9.100881399	-3.212391408	-27.92412513	-28.92587684	17.8	-0.184526702	1.080444963	17.83655476	15.76410713	60.32671862	126.0397918	68.13286299	70.27795017	17.8	0.641380264	-0.80719761	12.56929878	51.59378021	132.982953	231.3172312	177.1801752	-2.268620676	17.8	-0.387238206	1.504877276	33.89718017	65.61211362	157.4301295	41.75952928	38.58466697	18.06638114
17.9	0.685814232	-0.37666281	4.800998948	9.82174333	10.69261512	-6.559586953	-28.77081094	-29.933881	17.9	-0.343470949	1.065916344	15.94217075	14.72087982	55.72965732	128.8099824	69.47678956	70.40553695	17.9	0.862881198	-0.637944781	12.8235184	50.51114084	133.2485766	230.6944524	176.3601616	-3.055663722	17.9	-0.150035328	1.360553128	34.3844144	62.38199437	163.829022	38.24865289	33.29847238	20.15159502
18	0.553484305	-0.192469665	0.655076643	5.626390221	5.778376969	-7.115543886	-29.027034	-30.16800963	18	-0.422186195	1.148245185	15.05692934	17.00558013	58.15053158	134.5072279	68.74941467	70.52367286	18	0.831546919	-0.493175066	13.10326635	48.7563365	132.8105118	226.65504	179.792441	-3.543960063	18	0.530173496	2.095190619	36.52936013	67.49149528	167.7622215	36.77415113	37.53214745	24.91238315
18.1	1.124722189	0.608405374	6.250020114	8.444960784	8.145841164	-5.190399831	-29.85483157	-29.30119754	18.1	0.313498605	-0.407931335	17.43061533	13.94414671	59.02222983	127.0165548	66.25979459	72.7840066	18.1	0.765636885	-0.676266176	14.99768118	47.63148898	132.659492	221.3592579	181.9369212	-3.164860794	18.1	0.641190864	2.21998075	36.96749283	67.38648128	170.0786294	38.72020857	37.72237422	21.45430075
18.2	0.022520745	-5.184347315	3.051070554	4.89299516	8.118033768	-8.192214841	-30.37384751	-28.33519355	18.2	0.529965532	0.639743521	19.10328143	15.25874312	58.48697652	129.6298812	65.96946899	74.83799629	18.2	0.645702234	-0.821035891	17.50796697	47.25161552	132.642355	227.5610967	187.2803436	-2.081131364	18.2	-1.322861088	2.362605179	34.75828297	64.07457034	158.730392	42.38462567	36.71297622	6.883112069
18.3	0.167179548	-0.745860523	1.828936655	10.42429404	9.005952701	-9.494440431	-29.968161	-27.57561595	18.3	-0.175444173	0.870587134	17.27247828	16.24672163	54.82431457	125.4349749	66.65938251	75.7704824	18.3	0.024419127	-0.908323513	18.78863819	48.7816614	134.5456337	227.7816641	191.0515175	-1.52072375	18.3	0.235641784	2.572070379	37.12686664	63.76797746	163.7422422	35.69579638	30.66754663	21.32137276
18.4	0.478689128	-0.467542247	2.845101971	3.852074216	6.68451454	-7.039771626	-29.85811648	-28.58540735	18.4	-0.372232289	0.599386247	17.78275556	18.54442166	59.58501046	118.5572045	67.72078794	76.28870526	18.4	0.148675749	-1.104188422	19.15348058	50.04368545	135.3360781	225.6419433	194.8738035	-2.314977924	18.4	0.726619713	2.790781551	36.71735919	66.61422984	171.7580284	39.60710048	35.41280006	21.13049952
18.5	1.380340869	1.080653878	6.039224142	9.478381097	8.515008323	-8.439796296	-29.97062468	-27.87765975	18.5	0.130334282	0.058598763	21.08733078	16.10534971	60.54846642	108.83162	65.70411763	77.44643718	18.5	0.733222115	-0.675201693	19.88210166	50.28427197	136.9062563	224.073103	195.976044	-1.479517308	18.5	0.589050281	1.835727573	37.42462674	64.68093991	171.0913671	40.1113153	34.74915641	25.73225957
18.6	0.002794545	-1.278965792	3.101758135	5.846408739	9.821955953	-10.89975154	-30.62103706	-26.498803	18.6	0.157581868	2.329906194	20.06514594	18.65816918	60.83597392	116.9028525	66.02878282	80.09583185	18.6	0.464179517	-0.858292803	19.49066727	51.66658929	136.969449	221.8760778	198.1171908	-1.762811598	18.6	-0.427203572	1.744911018	34.66707768	66.7169768	170.2869343	37.96640021	33.55832696	25.72125606
18.7	0.389921227	-0.079681792	-0.543724877	11.22102777	10.27646305	-10.4768366	-30.74093631	-22.67768084	18.7	-0.543286573	2.19430575	17.91643843	18.6159201	56.70993552	121.7171301	66.06624419	77.96150975	18.7	-0.072825185	-0.403758477	18.79395659	52.59094804	136.7498811	217.9231625	199.2116535	-2.344852594	18.7	-1.034222484	2.067192691	35.54509473	66.11724063	164.6576527	40.04295259	27.52637293	23.79400328
18.8	0.495127629	-0.131612899	4.531469747	5.545550084	7.84763081	-9.211616064	-31.45540446	-21.61337857	18.8	0.5678094	0.395985581	18.70712367	18.24055327	63.33637153	113.9240486	67.90809478	77.06210169	18.8	0.271851877	-0.430370557	18.5003808	52.01164101	136.7948658	214.1302667	200.1494469	-3.471848789	18.8	0.777314323	1.878131255	35.8937073	66.48921083	162.8548411	39.56813164	32.81866855	20.31599384
18.9	1.871852027	1.199121715	5.364998858	9.769238911	7.872561579	-13.72270877	-32.05325826	-19.60898732	18.9	0.196939491	1.627689611	21.70520646	15.77223195	63.42812924	126.3907149	66.467393	75.58146495	18.9	0.366935205	-0.955160774	18.34401978	52.01375142	137.1761641	211.5331927	201.0539065	-4.415476316	18.9	0.825920514	1.078954444	37.23899584	71.34598825	168.7579105	40.04620562	33.63764243	21.78407475
19	0.007726095	-0.767768959	-11.57511256	7.980755047	6.573284955	-13.09802816	-32.47208442	-19.54107215	19	0.611708287	1.840776022	20.68139135	18.16255496	62.02117768	127.0165548	67.41173165	79.34291232	19	0.496594288	-0.694362391	17.61008029	51.03557726	138.5985356	210.7341762	201.7305844	-3.571774411	19	0.368602064	1.688595426	36.7789662	66.23138171	168.5347369	35.53015986	33.46619451	21.75413472
19.1	0.816500309	-0.199772477	-16.3711232	10.13927006	6.257814837	-11.78875399	-32.71270415	-21.28095167	19.1	-0.070995097	1.238645481	17.20889741	19.38127846	60.9353781	133.2280564	66.6609434	43.17284701	19.1	0.372337667	-0.849776938	17.11440521	50.82137084	139.6567458	207.973839	199.6905504	-3.929240297	19.1	-1.19084719	2.798043649	34.72235549	67.04075261	160.387464	45.08752967	26.84164174	20.43947318
19.2	0.220604674	-0.310937503	1.249650014	6.882329263	5.106205077	-13.19670831	-33.0280556	-20.68311942	19.2	0.566295645	0.016627197	19.00057386	18.09268148	63.59176383	123.2550467	67.48821528	76.18474566	19.2	0.654346172	-0.765682765	15.70609234	51.48298378	142.3922404	208.399837	195.9449324	-4.861536053	19.2	0.755807967	3.016717206	37.26341064	67.38467447	171.2218252	40.97057735	32.0512	25.12794546
19.3	1.344176168	-3.450335199	2.008354601	7.123182868	4.383212771	-15.81613773	-33.08472032	-19.14430455	19.3	0.45579155	0.980358921	18.8505882	17.76606359	62.996868	124.8463296	66.02878282	77.17866245	19.3	0.324796003	-0.867873152	14.46903201	52.46326835	142.8517263	208.2311677	198.0038556	-2.530281584	19.3	0.56031637	2.452242796	39.18828394	71.25602623	164.0276821	40.13710868	33.697907	23.84436665
19.4	-0.079397956	-1.751214295	-2.013664728	7.232358724	4.153082594	-14.64078662	-32.78989956	-19.57234887	19.4	-0.434296233	1.655132558	18.01262488	19.20415731	59.78076024	118.675257	66.75927949	77.18653818	19.4	0.450133117	-0.91045248	14.37542813	54.06823372	141.5835879	206.7380123	198.9283155	-0.861420675	19.4	0.400731755	2.018360953	38.94311436	66.57949044	169.8398014	36.19318718	33.82355329	20.05169521
19.5	0.408825502	-0.299577573	2.345467243	7.793239264	4.155000345	-15.57912915	-32.73241361	-19.60005112	19.5	0.802441384	1.023944778	15.46449905	20.67475032	59.17974724	113.3062945	66.96375613	76.54230368	19.5	0.21782726	-1.080769792	14.47222305	56.32109437	140.7374482	205.5562463	198.9127597	-0.748102958	19.5	-0.868230317	2.632795333	36.36205901	67.29556707	157.4984043	41.9430614	28.14848113	26.90450526
19.6	0.470469878	-0.098344534	2.458106312	6.570636362	4.008292357	-17.73247106	-33.76141199	-23.36487517	19.6	0.11671049	0.752743891	18.06968464	18.54117173	61.47827789	102.8077087	66.96531702	77.14085896	19.6	0.208102828	-0.668814794	15.80075989	56.40445549	139.7959839	204.9810409	196.1416024	0.336656633	19.6	0.899044458	2.119049361	39.28833247	66.66032262	166.686326	41.41030456	32.76412737	23.17251461
19.7	1.479793795	0.375526817	3.890231618	5.455542508	2.702303603	-18.67698109	-33.86406546	-23.50070551	19.7	0.034967734	1.627689611	18.64028223	19.44465208	59.7945239	116.8414005	66.82951956	79.64534025	19.7	0.061155868	-0.925355245	16.48577008	56.70518865	139.4521728	206.1260457	191.0604066	0.151227643	19.7	1.015408474	1.063944798	39.40181698	71.81537764	168.839284	37.75492696	31.77274127	28.2144031
19.8	0.606087505	-0.670398133	-2.772369315	7.284863143	4.238422534	-17.925426	-34.01188645	-23.80721742	19.8	0.03042647	1.785890128	17.10455956	20.20026064	57.01120668	113.3095288	67.78946711	78.86564324	19.8	-0.026364014	-0.728425853	17.30905873	57.07028925	139.93308	208.7577185	186.8236693	-0.392697394	19.8	0.441345871	1.445312833	38.50226912	70.97003004	159.3892295	35.80371283	32.02848331	27.60306021
19.9	0.451565603	-0.269554902	3.795292974	5.88974572	3.50392372	-19.58801036	-33.34587074	-22.93951171	19.9	0.561754381	1.737461398	18.22782169	21.90159864	61.4446334	118.0413313	68.36231386	80.11315845	19.9	0.476064933	-0.705007223	18.27062583	57.06501323	140.8638336	208.7696119	182.2969272	0.576684159	19.9	-0.495450752	2.698923938	36.90579437	67.38477103	159.0360972	40.20169966	29.5744603	24.30318654
20	0.547730829	0.317104321	4.117118886	5.604721731	5.297980224	-19.23558124	-33.62755186	-21.90112444	20	0.40129638	0.646200685	18.35661372	18.8320404	62.62677857	113.0556351	67.97209128	78.4970592	20	0.549538414	-0.547463709	19.16411738	55.71118643	141.8149375	208.7393379	177.9035206	-0.09601101	20	0.784651407	3.2610134	37.29760106	67.44784561	157.4429176	43.01030615	33.88638009	30.82073759
20.1	0.989104562	-0.226549454	0.808748516	3.512045597	3.017773721	-19.44615764	-33.55856873	-18.14613022	20.1	-0.361636006	1.162773804	18.67288781	20.72837416	59.51925077	121.460002	67.16979365	79.03418381	20.1	0.798051656	-0.876389018	19.05349462	54.40800942	141.6499938	208.1587264	177.4379573	-0.600789927	20.1	0.854093111	3.330748717	39.82185769	73.46112231	162.7447583	36.83555968	35.36169239	32.77232344
20.2	0.182796123	-0.297954726	2.402591342	7.645726849	4.114727564	-19.29637527	-34.00942277	-17.36689296	20.2	0.051619036	1.621232447	18.29955396	19.99389013	59.37702632	118.7092173	66.98560859	71.52389023	20.2	0.216746767	-0.765682765	18.66418758	53.17764149	141.0801883	207.8711237	179.5435479	-0.629634437	20.2	-1.163996807	2.834719363	40.02728585	74.30013743	163.2267009	40.12488325	33.90054537	27.41548797
20.3	0.460606778	-0.187601124	2.988314501	3.487876896	4.678546498	-19.84440254	-34.20323252	-15.76284379	20.3	0.280196001	-0.251345108	17.62298824	22.16971781	60.93843669	113.9774148	66.87322449	76.26665323	20.3	0.929871724	-0.603881319	18.29615416	54.03130157	141.4293548	207.7240787	182.4902637	0.220248434	20.3	0.588856249	3.72493932	39.34145586	66.91310507	160.1384438	40.51151996	32.39403934	27.29382912
20.4	0.360331926	-2.428752956	2.88372108	7.398206016	4.766763066	-19.68140408	-34.80437123	-14.84152084	20.4	0.236297114	1.466260511	21.24057699	18.89866395	59.69206112	109.1372627	67.50694596	77.03374907	20.4	1.069255238	-0.170636657	17.42606357	55.41995011	141.5225373	207.7219163	185.9103207	-0.45656738	20.4	0.502087024	3.71521463	39.17323956	67.01411266	152.1175198	46.65737712	38.008326	34.34959384
20.5	0.86745966	-1.925670358	-2.38778735	4.955500421	2.175880823	-19.45937373	-34.77562826	-13.34649339	20.5	-0.708285839	1.588946627	21.61065029	22.54670961	55.1332322	104.906779	66.05531795	76.74549745	20.5	0.728900145	-0.454853671	17.39947156	57.08506211	141.9466782	207.4018772	189.4859359	-1.013884511	20.5	0.666598893	3.31625795	41.74087122	74.3539734	162.5715782	41.85864464	38.96066291	24.74521974
20.6	0.035671546	-0.499999189	3.869312934	9.918418134	4.391842652	-20.95279212	-35.08112498	-13.59938805	20.6	-0.011958662	1.637375357	19.47987584	21.24836285	53.37607204	104.3504768	67.07301845	74.56234583	20.6	0.890973999	-0.412274343	18.0493803	58.58872789	144.310514	205.940077	192.1626472	-1.405345712	20.6	-0.637100038	2.206557213	39.51182635	74.35835632	162.7672391	41.94537743	35.78505689	25.13954451
20.7	0.052110046	-0.450502352	0.776565924	5.279694374	3.455979933	-20.03559534	-34.94726486	-11.1723142	20.7	0.11368298	-0.230359325	21.1932989	23.56231252	56.12268618	96.98917637	66.93253832	76.58640775	20.7	0.558182353	-0.426112624	18.70886216	59.14904124	143.7910485	204.0652534	194.7282455	-2.088342491	20.7	0.245371534	2.761125967	40.36154361	70.76474242	163.7344346	40.97345372	37.16754598	26.77020105
20.8	0.225536224	0.222167767	-0.60809006	8.509132852	4.164589103	-20.94133817	-35.30039279	-13.53772822	20.8	0.446709022	1.540517897	21.10363357	19.00916155	55.48649938	111.8945161	69.06315362	76.58483261	20.8	0.643541249	-0.291987741	19.45450213	58.48215228	142.6139504	202.9332232	199.6138825	-3.888033855	20.8	0.702106889	2.914503178	39.26666561	66.36347796	159.3131527	48.28669177	37.73007361	21.36956884
20.9	0.623347931	-1.09071553	3.005210362	4.379618618	-0.863755264	-21.66029357	-34.77480703	-9.881925896	20.9	-0.482736384	1.167616677	20.07166706	21.88859892	50.67686605	109.7000335	69.3737708	79.85325945	20.9	0.445811147	-0.682653075	19.49279463	58.13604535	142.504702	202.3839669	200.8316805	-2.963979389	20.9	0.451964899	3.113078728	39.77082405	73.35337696	153.8012014	44.11868153	39.32920148	30.09514742
21	1.137051065	-0.137292864	4.419635243	9.524218288	1.406862482	-22.03034415	-34.74195792	-10.55750315	21	0.262030944	-0.07700168	18.5424655	19.93214148	57.56481153	117.5367782	72.52833016	80.60775413	21	0.177849042	-0.640073747	18.92691665	56.94683038	142.2037333	200.0712519	200.4638966	-3.753082757	21	-0.582775674	2.591157573	37.15453773	73.31154096	161.555237	44.02656033	40.32748171	30.84271627
21.1	0.134302547	-0.043167733	3.660126091	1.566048476	0.665651537	-22.06823028	-35.08358867	-10.85418523	21.1	0.090976659	-0.884147178	20.83952839	19.85901807	54.29364914	97.55194714	74.46695595	77.45903834	21.1	0.361532743	-0.6177196	18.40996796	55.87368785	143.1709031	198.8094762	198.743868	-5.017090372	21.1	-0.362797029	3.05294521	39.24117556	74.16888387	164.6091187	37.99320979	35.62036322	31.62164799
21.2	0.634032956	-0.069133286	-2.37250062	5.789737303	2.965035555	-23.46737387	-35.53608516	-14.35985927	21.2	-0.170902909	0.552571808	21.96605107	18.13818049	54.33341082	107.2726802	76.17456997	75.60981757	21.2	0.357210774	-0.643267197	17.48350232	56.36963376	143.3444153	197.3660566	198.2760824	-2.333520823	21.2	0.590754255	2.878980982	40.71340771	65.94452749	160.7201334	43.48662162	45.2530222	53.40887632
21.3	0.375126576	-1.123172471	3.28439434	1.541879775	5.134971349	-24.16870782	-34.8388628	-14.96305325	21.3	-0.42369995	1.009416159	21.28785507	19.17165802	51.79783941	105.7897469	76.53357475	71.93657834	21.3	0.597080077	-0.481465751	16.84742143	56.51947274	144.3126561	193.9786158	197.6660722	-1.406375873	21.3	1.04090263	2.771193142	40.3501631	69.83989118	163.923704	49.70072044	46.87462476	51.16587892
21.4	0.989926487	-0.459428011	2.787173306	5.623890011	7.738318976	-22.60216039	-30.06917201	-14.9478617	21.4	0.159095622	0.92870161	21.32209093	18.86778963	53.2292597	100.9625321	80.81353604	73.02500386	21.4	0.219988244	-0.691168941	16.19219429	57.73084699	144.1252201	191.5772413	198.0627455	-0.34943063	21.4	-1.370889489	2.006881641	38.71470539	72.38238261	157.6453983	44.95511031	49.09452765	51.80223036
21.5	-0.140220407	1.074162489	3.867703804	3.810404042	8.809383174	-18.16772102	-29.48774277	-8.084854648	21.5	0.20299451	0.294285248	23.82456895	17.18107631	52.14651871	96.93904449	81.69543908	70.09838359	21.5	0.218907752	-0.467627469	15.92201946	57.4733772	142.2883473	187.3702409	198.0716345	-0.686293295	21.5	0.58195803	2.164607088	36.60970047	70.06274121	161.4994688	39.91564693	47.44538943	56.75953091
21.6	0.472113728	-1.784482661	0.816794163	5.479711209	8.548568974	-16.25314984	-28.71168254	-8.072343958	21.6	-1.107917089	1.944090646	23.27190443	15.24899333	47.09678603	98.48828127	82.57890301	66.14476847	21.6	0.617609432	-0.38140433	16.60277493	55.55290582	138.4410894	181.8701095	197.7605182	-0.019779092	21.6	1.036481894	2.234986711	34.36762572	59.08857595	155.6519642	42.43375738	50.10514762	54.27925648
21.7	0.992392262	-0.273612019	2.297997921	5.414705738	3.027362478	-15.75270049	-28.47352649	-5.118927512	21.7	-0.328333401	2.061933888	19.84016746	14.89800097	42.38349829	92.24443657	80.6746168	60.62860905	21.7	0.322635018	-0.707136189	17.01229189	50.1608131	132.0886155	174.9817005	192.6382106	0.082206852	21.7	1.130526167	2.117129661	28.10191665	54.59424218	145.8555476	41.40910492	48.63685781	47.02078191
21.8	0.765540958	-0.364491457	1.359875389	7.169020059	1.829726682	-15.46194647	-29.33992177	-5.87135615	21.8	-0.154251607	0.870587134	16.7703524	12.97566778	40.10178989	82.82934623	80.62310742	58.35882444	21.8	0.710531775	-0.593236487	16.93677058	44.25272559	124.2987751	166.4293043	185.681428	-0.215509693	21.8	-0.944801529	2.02975283	24.92540962	51.40853113	142.5840055	39.70320374	45.7484668	39.18249666
21.9	0.066904696	0.654656516	2.0654787	3.367033392	-0.750607927	-17.69370385	-30.82552277	-6.52638013	21.9	-0.083105135	0.220027863	15.66502335	10.58534477	36.53853212	79.35892647	74.8150345	53.02380675	21.9	0.518204135	-0.432499524	15.58376909	37.53529658	115.2129487	156.8692175	175.1056962	0.002884451	21.9	0.761355574	1.242104765	20.6822263	47.67735452	133.8825607	30.00834685	38.55887094	35.43253494
22	0.745814758	-1.597043822	-1.337025749	2.024420389	-2.591649343	-19.30959136	-32.54106755	-11.72546542	22	-0.967137899	0.691400833	13.82606881	10.01660714	30.81132168	76.22810975	68.19842038	47.73761857	22	0.652185188	0.005003071	13.84146056	31.79287611	106.172107	146.7360878	166.5977766	-0.254655813	22	0.964914137	1.598103816	19.57662305	40.85209281	114.092409	30.57841752	39.93989543	30.00598761
22.1	0.682526532	-0.444822388	-1.007958755	0.283440523	-5.855662353	-21.77835733	-33.81889793	-13.88266581	22.1	0.003178885	0.62198632	9.574301589	9.299997725	27.6334463	70.9125134	60.79980021	41.61187786	22.1	0.391786529	-0.363308116	11.01738905	26.53901511	97.79960842	136.6462065	156.4687189	-0.713077483	22.1	1.033798522	1.39938695	15.82215062	34.39904868	112.18241	26.64839191	37.12100239	26.39182498
22.2	1.393491669	-0.216812371	-1.721607714	-0.059088307	-6.966040457	-23.47882782	-35.50159359	-17.2650202	22.2	0.154554358	-0.361116896	9.368886454	8.63538718	25.60560089	61.80468296	55.46311616	38.63642807	22.2	0.913664339	-0.526174045	8.949594312	23.4124455	88.91835502	126.3790063	147.3741229	-0.508075433	22.2	-0.735613851	1.167657376	14.3569303	32.86908328	106.4602625	27.04698725	33.95406915	20.42759218
22.3	-0.513374364	0.565399926	-1.523684778	-3.482709795	-8.293124477	-26.50971823	-36.7802452	-19.19613455	22.3	-0.173930419	-0.348202568	8.503208389	6.300312968	23.24283984	61.42141666	49.05566135	35.05454729	22.3	0.458777056	-0.633686848	7.381729374	20.24472292	82.6344291	118.4764193	137.9828553	-0.784158595	22.3	0.769046709	0.278370329	12.61291896	31.48166892	97.06797818	20.19976076	29.36870419	13.61946168
22.4	0.418688602	-1.209183367	-3.331541836	-3.83857308	-8.398600809	-27.85335424	-37.57765735	-22.10665721	22.4	-0.058885059	0.512214533	7.82501239	6.623680935	18.85070409	58.03670624	43.46767396	31.2994005	22.4	0.86396169	-0.133379745	5.18948403	17.80403594	76.87425293	111.571792	130.5393979	-1.125141905	22.4	0.85984199	1.222496405	12.27499088	28.1619069	86.97244484	21.10434959	28.59033489	14.72193101
22.5	0.60855328	-0.380719927	-3.201202342	-5.196187346	-9.943349621	-29.22870888	-38.51796313	-23.18704464	22.5	0.121251754	0.521900279	4.82366904	6.232064453	16.71886661	53.86929164	38.08728499	27.01973027	22.5	0.583033677	-0.444208839	4.242808457	16.45970598	71.32186296	107.1366556	122.0725901	-1.768992564	22.5	0.030345544	1.386825028	11.03941087	23.74623313	75.86635142	18.63675907	26.97885088	8.212625694
22.6	2.01322313	-0.181921159	-3.272808607	-4.195269769	-10.56374222	-30.41991929	-38.88176702	-23.82777069	22.6	0.40129638	-0.695275132	5.537731174	6.238564311	15.94504325	47.69336755	35.4212843	26.2794119	22.6	0.812098057	-0.390984679	3.068505274	14.78298673	66.54706465	103.3059174	115.0158058	-1.866857865	22.6	0.652378133	0.952011038	7.462528549	21.58597839	74.96035365	16.90694362	25.65602448	10.03344629
22.7	-0.446798438	0.455046324	-3.088563273	-7.149685098	-10.61168601	-31.53359531	-39.70299477	-24.9153071	22.7	-0.976220427	-0.553217524	5.583378981	3.521623405	14.55644323	49.76171186	31.82499298	23.1543233	22.7	0.983896342	-0.561301991	2.968519314	13.75099717	62.69123828	98.95079075	108.9157042	-1.27657558	22.7	0.792745771	-0.111933851	9.283877619	22.12010375	68.2093222	15.89356564	21.65527519	6.531581538
22.8	0.876500835	-0.801848747	-3.103850003	-6.367119233	-10.81017329	-31.82963576	-39.86477664	-24.85364727	22.8	-0.749157217	0.140927604	5.661632366	4.451103189	11.09106035	46.49505392	28.69228608	21.30510253	22.8	0.883410553	-0.694362391	1.896329452	12.61770801	57.87252638	96.23262085	102.9767163	-1.369290075	22.8	0.990016609	0.712343292	8.968014157	20.56313206	62.38529948	14.91013094	22.27376627	5.218127532
22.9	0.497593404	-0.082116063	-4.302651524	-6.98717142	-10.08142773	-32.18558917	-39.89762575	-26.87144283	22.9	-0.376773553	0.186127752	2.839619689	3.719869093	10.58792224	41.68724499	25.92170574	17.99414676	22.9	0.711612267	-0.596429936	1.307050499	11.40211294	54.34230313	91.56394241	96.4410518	-1.113810133	22.9	-1.164502326	0.90376413	8.436313414	16.91649809	55.45411089	14.37999939	21.44040692	5.982471212
23	2.01651083	0.41528657	-4.338856939	-5.825406972	-12.28492417	-32.69484925	-39.94443573	-26.30131282	23	-0.331360911	-0.709803751	4.267743955	3.035758972	10.37229162	38.77151021	24.9430275	17.8224559	23	1.136245764	-0.632622365	1.069849766	10.44398766	51.62822979	86.08759773	90.34317239	-0.636845564	23	1.138881217	0.813094225	5.970010034	15.79317293	53.56573623	10.49899814	19.50760497	5.70274664
23.1	-0.907898371	0.093151423	-3.949447586	-8.839827352	-11.02112595	-32.96974396	-40.39611099	-26.70791024	23.1	-0.582644196	-0.982618929	3.667801341	1.735787247	9.463890282	38.66639498	22.63603159	16.38749839	23.1	0.7494295	-0.977514921	0.920934507	9.116540957	48.69565962	83.14994156	84.0886237	-1.254942198	23.1	0.86901673	-0.004838988	7.161947349	15.85274669	48.72694176	14.13560963	17.82010462	0.987895194
23.2	0.526360779	-0.616032756	-3.149710196	-7.646393571	-11.42097713	-33.24816296	-40.34108873	-26.56761179	23.2	-0.019527436	-0.030187242	3.074379842	3.349377151	6.821268214	37.13009546	20.7614023	14.66743954	23.2	0.684599959	-0.330309137	1.10707858	8.657527193	45.67954655	79.20891958	80.37189509	-0.762525213	23.2	1.132468422	0.646483591	7.369426284	15.49770731	45.921326	12.10556474	18.71329649	2.467722112
23.3	0.533758104	-0.270366325	-4.877110776	-7.966420507	-10.3710082	-33.28340587	-40.62359108	-28.03404337	23.3	0.139416811	-0.1092875	1.222383076	3.068258265	7.310642671	32.73789598	19.96690912	12.615025	23.3	0.921227785	-0.35479225	0.941144435	7.716285175	43.35212692	75.7122762	77.86296438	-1.376501202	23.3	-0.385513386	0.612742577	6.937419534	12.26823504	40.91122109	12.17146449	17.66487459	2.144601102
23.4	1.598150997	0.508600278	-4.235068082	-6.650476415	-12.64066707	-33.73099085	-40.47494886	-27.32540215	23.4	-0.886908898	-1.583135179	2.523345593	2.45564659	6.952787599	33.59822371	18.57303406	12.65440363	23.4	0.637058295	-0.313277405	0.385903256	7.201345596	41.34495508	73.3876679	74.41290688	-0.654358302	23.4	1.088121264	0.423519113	4.4688076	13.53318886	40.71190085	7.391038954	17.76747097	0.589891237
23.5	-0.081041806	-0.491884953	-4.313915431	-8.892331771	-11.26947477	-33.55213308	-40.97014919	-26.9608049	23.5	-1.366769148	-0.304616711	2.736912121	1.748786964	5.181863783	33.34109569	17.45699747	11.6242585	23.5	0.80453461	-0.40482296	0.213587028	6.633645814	39.49951374	70.7592387	72.91954866	-0.443175286	23.5	1.145496968	0.287678827	6.127729122	10.95205046	38.86736993	12.63637463	13.28190641	1.205211922
23.6	0.616772531	-0.535701825	-3.20602973	-7.9647537	-11.09208275	-33.74861231	-40.99807094	-26.86608111	23.6	0.06221532	-0.411159917	1.579414143	2.748140228	4.395806061	31.87109962	15.29204258	10.51850638	23.6	0.809937072	-0.669879277	0.148702523	6.448985105	36.66119711	68.52653351	69.24282071	-0.323676604	23.6	1.25510038	0.245304628	5.671504256	13.0345435	34.41584245	9.947457441	15.65892264	-3.21582537
23.7	0.772938283	-0.242777925	-4.996186363	-8.128934185	-10.87921234	-33.8331953	-40.86174713	-27.27446577	23.7	-0.161820381	-0.771146808	1.054464356	1.982781874	4.148060242	27.67134187	13.79358786	8.754343464	23.7	0.964447479	-0.30476154	0.084881697	5.208065136	34.47515777	66.72955723	66.6061101	-0.191815989	23.7	-0.733995628	0.468789635	5.532740917	10.49334224	32.45385396	9.91754593	15.33887407	-1.236617047
23.8	1.997606554	0.505354584	-4.326788467	-7.158852537	-11.72302299	-33.85962748	-40.80590364	-27.04123077	23.8	-0.926266521	-2.450009444	1.944596604	0.656810714	3.846789092	29.4275748	13.88099772	9.162306139	23.8	1.024955052	-0.285600842	-0.156573758	4.699456781	32.14988026	65.52076091	62.22937049	-0.645086853	23.8	1.271032417	0.589693093	4.264909102	11.66601153	31.97715526	7.305611161	14.66019026	0.142678017
23.9	-0.208440184	-1.338199711	-4.44345036	-9.294032248	-11.40851175	-33.95037798	-41.0325625	-26.80442128	23.9	-0.307140835	-0.407931335	2.736912121	1.344170764	2.496421449	28.86480402	13.24571536	8.162088769	23.9	1.107072471	-0.208958052	-0.21188514	4.582329131	30.28408872	63.11073677	62.25492647	-0.199027116	23.9	1.149088777	0.488682913	4.30483411	8.992594645	31.1707055	10.23943194	12.72162949	-0.738565109
24	0.712937757	-0.36530288	-3.981630177	-8.568137818	-10.95304577	-34.1829812	-40.72378087	-26.26914247	24	0.097031678	-0.461202937	0.840897827	1.332796012	2.325140389	26.21428306	11.38357319	6.763359596	24	1.116796902	-0.01202866	-0.401220254	4.057892715	28.10554682	60.0249544	61.37268954	-0.733680704	24	0.67227881	0.328801394	4.947753319	10.75200128	30.15767287	8.498739527	12.59811496	-1.513496939
24.1	0.695677332	-0.873254019	-2.817424942	-8.362287159	-10.34128305	-33.99443162	-40.61702126	-27.29859353	24.1	-0.11035272	-0.950333109	0.935454	1.19954891	2.393958672	25.11461603	10.32372865	6.454631085	24.1	0.968769449	-0.389920196	-0.321444223	3.370954875	26.99057036	56.42127092	58.47486347	-0.580186706	24.1	-0.671515488	0.764269221	4.942191161	8.477466832	23.60683079	8.235071065	13.38214468	-2.854430867
24.2	1.717330125	0.969488852	-4.822400371	-7.375537441	-12.10273778	-34.3124989	-40.51601025	-26.36207903	24.2	-0.723423387	-2.028679494	1.254988653	-0.587912213	2.043750076	25.15504497	9.87575313	6.23411072	24.2	0.936354678	-0.294116708	-0.742661669	3.85107272	24.92556113	53.81879084	56.62261038	-0.782098273	24.2	1.19445359	0.717003132	4.02713609	10.12520271	26.45570367	5.488211092	12.97652955	-2.50929146
24.3	-0.603786115	-1.419342065	-3.902782829	-8.947336401	-11.13427329	-34.30721246	-40.9438699	-26.757953	24.3	0.375562549	-0.591960508	1.765265931	0.981803646	-0.312893794	24.60682861	9.3153935	5.443387697	24.3	1.302641588	-0.238763581	-0.566090719	4.392392401	23.850214	51.44336551	54.17590293	-0.727499737	24.3	1.027368877	0.713816045	3.39084183	8.13991571	25.59828726	9.06657155	10.59766874	-2.032848496
24.4	0.85102116	-0.383965622	-4.467587303	-8.236443234	-11.0546866	-34.30721246	-40.77633944	-26.28880213	24.4	0.657120929	-0.645232111	0.144768761	1.323046224	1.473322975	22.329871	8.002684731	4.16436958	24.4	1.314527004	-0.199377703	-1.248973548	4.348073831	22.48889308	49.65828258	52.23142608	-0.892325506	24.4	0.652122066	0.429109065	4.446216505	9.095134406	24.43867839	8.131498744	12.39460976	-2.199044701
24.5	0.411291277	-0.51866193	-2.71604978	-8.222275375	-10.77853039	-34.14950043	-40.96193691	-26.59442041	24.5	0.08492164	-1.305477128	0.883285077	0.944429459	1.357096541	21.28195301	7.418911747	3.655597594	24.5	0.879088583	0.122096223	-1.009645454	4.247829445	22.11937638	48.6905968	49.88916482	-0.79858085	24.5	-0.78610357	0.689413899	4.288187521	7.28478925	21.89711866	7.561684033	12.20579636	-5.527474608
24.6	1.7197959	0.462349136	-5.124916728	-7.098847486	-10.44771826	-34.26668311	-40.74266911	-26.74544231	24.6	0.050105282	-2.165894228	1.121305788	-0.121547356	0.629152036	22.35412836	6.949083757	3.217707155	24.6	0.771039347	-0.797617261	-0.679904524	4.076886388	20.94120722	47.66128186	47.15356367	-0.424632387	24.6	0.895420633	0.726118083	4.100326579	8.841169444	22.03424596	5.072135577	11.50308691	-4.087533513
24.7	-0.30131771	-1.247320274	-4.200471797	-9.200691058	-11.85055346	-34.23936986	-40.97261288	-26.34420661	24.7	0.333177417	-0.943875945	1.424537653	1.495292477	-0.603459877	21.89000419	6.338775638	3.249210065	24.7	1.03792096	-0.241957031	-0.914977897	3.713896193	20.27821929	47.58343452	45.24242071	-0.6914441	24.7	0.563004048	0.719780761	2.564917006	6.564508142	21.28893659	6.580543634	10.41374404	-2.675011882
24.8	0.749924383	-0.677700945	-4.265641544	-8.48229726	-10.86866471	-34.18121905	-40.65890387	-26.18246126	24.8	0.387672587	-0.588731926	-0.522015285	1.171924511	0.665855121	18.1737765	5.111915837	2.464787623	24.8	0.776441809	-0.382468813	-1.140478146	2.923548356	18.76802063	45.35721661	43.00238337	-0.926320821	24.8	0.293491303	0.535959422	4.119780938	8.265081331	21.21875787	7.81982699	10.49209585	-3.244451129
24.9	0.59869018	-0.333657362	-2.984774416	-8.571471432	-10.89455435	-34.43144373	-40.92333921	-25.66148039	24.9	-0.429754969	-2.167508519	1.212601403	0.710434548	0.497632651	18.98558951	4.958948584	1.623659945	24.9	1.231329092	-0.717781021	-1.137287104	3.336133141	18.15001735	44.09868449	40.53123108	-0.166061962	24.9	-0.489633909	0.433847695	4.350585884	6.557659493	19.1874565	6.257712223	11.60819632	-3.664233259
25	0.897870885	0.675753528	-4.810331899	-7.245526498	-9.435145481	-34.30985568	-40.72788701	-26.58190972	25	-0.500901441	-1.266734144	1.201189451	0.419565874	-0.484174853	18.48912219	4.073923766	1.888284383	25	1.057369822	-0.282407393	-0.790527288	2.496190713	17.46239498	42.87475119	38.8445363	-0.357671918	25	0.916302329	0.617278004	3.40574344	7.916703627	20.10427545	5.563966219	10.65212559	-4.644574621
25.1	0.385811602	-1.412039253	-4.501379024	-9.816576228	-11.94452329	-34.18474334	-40.93073026	-25.97514126	25.1	0.251434661	-0.997147548	1.00555599	1.29379686	-1.600560334	18.12849609	3.643118035	1.7087178	25.1	1.049806376	-0.360114666	-0.686286607	2.375897451	16.76727517	40.90802444	38.71675639	-1.038608376	25.1	0.991698178	0.575789567	2.721843096	6.34056188	18.66573147	4.407025938	9.539554612	-5.003371228
25.2	0.158960298	-0.039922038	-4.202885491	-8.510632978	-10.18882181	-34.03848526	-40.76237857	-26.03322661	25.2	-0.219343061	-0.711418042	-1.187169053	0.586937234	-0.630987191	15.68173696	2.001061405	1.092835923	25.2	1.139487242	-0.203635636	-0.837329226	2.748384483	15.68550166	39.09699239	39.04120624	-0.860390513	25.2	-1.006889362	0.606160114	3.858283018	6.88783067	19.076705	7.458289831	9.986861793	-4.072742317
25.3	0.602799805	-0.00584225	-2.787656045	-8.576471853	-10.16389104	-34.41822763	-40.69421667	-25.46309659	25.3	-0.79154235	-2.634038617	0.764274722	-0.55216299	-0.32359886	16.91886236	2.979739643	1.296029688	25.3	0.553860383	-0.323922237	-0.382074007	0.119871181	14.97645804	36.77887136	37.63118274	-0.571945418	25.3	0.652433553	0.423586973	3.829251594	5.210698617	17.74883012	6.200034517	10.10623944	-3.847312781
25.4	1.004721137	0.654656516	-5.116066515	-7.152185309	-9.524320924	-34.26844526	-40.80097628	-26.21731247	25.4	-0.260214438	-2.167508519	0.645264366	0.294443596	-1.374224647	15.9534194	2.662878906	0.732127612	25.4	0.430684254	-0.683717559	-0.307616377	1.171909624	14.47198742	35.79064253	37.53006995	-0.586367673	25.4	0.88948958	0.794927736	2.597728293	6.812325682	16.57535972	5.666536006	10.07822326	-7.039483818
25.5	0.879788535	-1.503730114	-4.153002475	-9.38320642	-11.37686885	-34.48166488	-41.23540576	-25.44701142	25.5	0.377076304	-1.977022182	0.302905809	1.012677974	-1.764194918	15.02193674	1.901164424	0.680147812	25.5	0.775361317	-0.444208839	-0.777763123	1.193013705	14.36809432	35.69982063	37.16339717	-0.420511743	25.5	1.047300571	0.607297753	2.150962584	6.73294645	18.46411032	4.301726267	7.959136291	-4.67669263
25.6	0.263344775	-0.637129768	-4.168289206	-8.694815147	-9.730479208	-34.03584204	-40.88556273	-25.31296831	25.6	-0.111866475	-1.106919335	-1.456165062	0.885930731	-0.8817916	12.55577172	0.747666469	0.139872917	25.6	0.917986308	0.11783829	-1.137287104	1.373453598	13.83898926	35.19813772	36.70227837	-0.34015918	25.6	-1.031812966	0.690251116	3.934470864	5.555733164	15.84743248	4.634113712	9.99087931	-4.879463706
25.7	0.626635631	-0.53245613	-2.838343626	-8.433959858	-10.23580672	-34.241132	-40.89377501	-24.87330692	25.7	-0.674983235	-2.73573895	0.187156011	-0.29379361	-0.747213624	14.1163286	0.810102082	0.042213898	25.7	1.49604972	-0.150411476	-1.323431178	1.286926866	13.0153419	34.75051547	36.3922732	-0.384456106	25.7	1.067494948	0.316051009	3.888827817	5.228118614	16.99274621	6.821622467	9.95052562	-6.861114464
25.8	1.050748938	-0.168126959	-4.272882627	-7.613057432	-9.172413529	-34.42351407	-40.95290341	-25.44522418	25.8	-0.092187663	-1.303862837	0.06162454	0.788432852	-2.175575321	13.34171021	0.647769488	0.021737007	25.8	1.161097089	-0.056736954	-1.030919062	1.393502476	12.67902816	33.91257527	35.75892932	-0.168122284	25.8	0.826565956	0.602370659	2.711572696	6.292963578	15.49394639	3.571276464	9.031519601	-6.723710813
25.9	1.894865928	-1.747968601	-3.925310642	-8.99734061	-11.19468246	-34.37593614	-41.15164053	-25.09849934	25.9	0.248407152	-1.202162504	-0.083470277	0.404941193	-1.615853286	12.33907262	0.84600256	0.089468262	25.9	0.989298804	-0.314341889	-0.812864576	1.603488083	12.8193374	32.42698838	34.62891048	-0.597699444	25.9	0.105602469	0.106480459	3.156400279	6.577427903	16.37042349	2.740780535	8.626558204	-5.38925856
26	0.085808971	-1.14345806	-4.164266382	-8.461462173	-9.54541619	-34.43144373	-40.92580289	-25.11279727	26	-0.87479886	-1.300634255	-2.196311657	-0.00779983	-1.404810551	10.95802021	-1.044235632	-0.286991504	26	0.869364152	-0.322857754	-0.84796603	1.198289725	12.31700891	31.09925861	33.83334167	0.156378448	26	-0.030820308	0.657754615	3.230823857	4.485061916	16.05850146	3.884661448	8.414415122	-5.941197787
26.1	0.723622782	-0.288217643	-3.88105958	-7.67472929	-9.639386013	-34.61118258	-41.04241723	-24.01989915	26.1	-0.034664983	-2.37898064	0.21650103	0.141696918	-1.683142273	12.38758735	-0.650891268	0.034338171	26.1	0.71269276	-0.545334743	-1.145796548	1.202510541	12.09744102	30.08291824	33.38000078	-0.272168551	26.1	0.805034511	0.378907002	3.361044184	4.530956395	15.34708137	6.364722895	9.025059531	-5.38989957
26.2	0.89376126	-0.577084425	-3.512568911	-8.990673382	-9.024746665	-34.53452924	-40.85928345	-25.34156418	26.2	0.952303102	-1.883393304	0.449630905	0.260319338	-3.406657939	12.33907262	-1.237786033	-0.526413614	26.2	0.633816818	-0.43143504	-1.169197517	1.384005639	11.47622455	28.23080009	33.09555159	-0.238173236	26.2	0.726528282	0.31077406	2.420168185	5.110243604	13.4743644	4.189692676	8.879863196	-5.622793396
26.3	2.048565905	-0.845665619	-4.470805562	-9.088181589	-11.38741648	-34.35038503	-41.13932211	-24.23704898	26.3	0.034967734	-1.266734144	-0.416047161	0.504064037	-2.742943832	10.92244275	-1.237786033	-0.523263323	26.3	0.463099025	-0.46124057	-1.264928755	1.210952174	11.16133206	28.65247322	32.1622027	-0.1835747	26.3	-0.92415905	0.449940463	2.72221517	5.830737486	15.1041942	2.949616162	7.620201249	-7.72351881
26.4	-0.328441236	-0.489450682	-4.165875511	-8.833993528	-9.832120036	-34.26492097	-40.96029446	-24.23526174	26.4	-0.578102932	-2.333780492	-0.458434411	-0.633411223	-1.86818699	10.27719695	-1.885555521	-1.748726495	26.4	0.933113201	-1.124413603	-1.687209881	1.102266156	10.50584158	27.9940144	31.81775252	-0.41742126	26.4	0.374047694	0.852907467	3.030517162	4.955216607	14.89718676	2.414540419	8.843654002	-5.526108261
26.5	1.022803488	0.609216798	-4.021858416	-8.018091523	-9.544457315	-34.68519269	-40.88884765	-23.69730207	26.5	0.346801209	-1.994779383	-0.419307718	0.375691829	-2.368266513	9.924656637	-0.925607967	-1.019434145	26.5	0.283737293	-1.044577363	-1.629771139	0.943985548	10.02279222	27.68046259	31.51108074	-0.628604276	26.5	0.66994487	0.762834846	2.77067391	4.351250458	15.09464989	4.569541617	8.985106672	-5.427932111
26.6	0.86745966	-0.705289346	-3.626012545	-9.773239248	-8.786945482	-34.39708189	-40.69668035	-25.03237141	26.6	0.240838378	-1.355520149	-0.230195373	0.491064319	-3.321017409	10.36452345	-1.759123404	-1.1218186	26.6	0.67163405	-0.75078	-1.592542324	1.294313294	10.01208159	26.64357916	31.00551676	-0.89644615	26.6	0.802007947	0.328026828	3.176746306	3.847243837	13.01350339	4.605603096	8.095213503	-7.521511734
26.7	2.402815586	-0.221680913	-4.869065128	-9.259029302	-10.81017329	-34.10985216	-41.07280266	-24.3934326	26.7	0.012261413	-0.575817598	-0.892088583	-0.407541136	-2.710828633	8.679445444	-2.026035651	-1.280908292	26.7	0.420959823	-0.823164858	-1.446818106	0.653804433	9.722894612	25.41640222	31.21440913	-1.2178564	26.7	-0.400309315	0.242526873	3.085337553	5.459650819	13.06852478	3.753388804	7.494221002	-7.967459005
26.8	0.168001473	-0.247646466	-4.558503123	-9.194857234	-9.252000215	-34.1019225	-40.87817168	-24.43811364	26.8	-0.529662781	-2.120694081	-0.47310692	-1.236273111	-1.989001309	8.208852643	-2.388162208	-2.013350933	26.8	0.292381232	-1.287279532	-1.07559364	0.852182795	9.044911809	24.84227803	30.86773668	-0.871722285	26.8	0.499282203	0.824869763	2.957735409	5.050952827	14.02419483	2.241838142	9.07379417	-5.742625019
26.9	1.287463342	0.569457044	-5.029978084	-7.968087314	-9.330628025	-34.3609579	-40.88392028	-23.91355828	26.9	0.59657074	-1.868864685	-0.125857527	0.242444727	-2.629775989	8.317202188	-2.414697343	-1.436847693	26.9	0.7494295	-1.389469919	-0.874558041	0.639031576	8.802851598	23.35560993	30.28994928	-1.200343662	26.9	0.810491375	0.485105683	1.872323947	4.168721852	14.12082207	3.706494775	9.062926968	-7.002965832
27	1.174859615	-1.367410958	-3.766006816	-9.757404582	-8.239427436	-33.9724048	-40.64740669	-24.8375621	27	0.328636152	-0.792132591	0.059994261	0.22944501	-4.244711697	8.541987066	-2.481815628	-1.290359165	27	0.443650163	-0.973256989	-0.806482494	1.056892382	8.616486657	22.49820789	29.86438663	-0.968557424	27	0.821036821	0.015737861	3.121546136	3.428615697	11.98995488	4.126144365	6.703978931	-5.943633517
27.1	2.262266409	-0.222492336	-5.664779694	-9.254862284	-11.0153727	-34.16624081	-41.2337633	-23.87691983	27.1	-0.626543084	-0.800204046	-1.540939562	-0.241794741	-2.778117621	6.81486297	-3.068710392	-1.37541702	27.1	0.46093804	-1.346890591	-0.974544	0.826857898	7.613971801	22.1868185	29.34882248	-1.340445565	27.1	-0.916360009	0.335000197	3.31713732	4.988515948	13.6451099	3.898310148	7.306420692	-8.560060045
27.2	0.619238306	-0.113761581	-4.863433174	-9.21319211	-9.254876842	-33.9820966	-40.99232234	-23.85726018	27.2	-0.269296967	-2.05450815	0.192046848	-0.540788238	-2.375912989	7.020241959	-3.165485593	-2.22284528	27.2	0.204861351	-1.071189443	-1.190471125	0.858514019	7.09664843	22.92744952	28.79547992	-1.693790807	27.2	1.010262786	0.506282489	2.333533075	5.053928341	13.30934866	1.957570107	8.356712257	-6.628430251
27.3	1.132119514	1.059556865	-4.694474571	-7.766403672	-9.397749327	-33.86050856	-40.71228368	-23.67406793	27.3	-0.117921494	-0.427302826	0.307796646	-0.00779983	-2.453907043	7.409976891	-3.170168264	-2.013350933	27.3	-0.266233317	-0.993482169	-1.164942795	1.213062582	6.882435854	21.80406904	28.8243693	-1.432129899	27.3	1.128368098	0.7112115	2.527844184	3.460709429	13.43022031	3.471177214	8.400970348	-6.359311286
27.4	1.239791691	-0.611975638	-3.562451927	-10.24411221	-8.432161459	-33.84729246	-40.37722276	-24.96266899	27.4	-0.226911834	-1.173105266	-0.042713306	0.456940062	-3.897561692	6.979813024	-3.295039491	-1.829058914	27.4	0.022258143	-0.540012327	-0.825628741	0.696012595	6.94027325	23.08746906	28.98992761	-1.506301495	27.4	0.946480216	0.408038246	2.718960039	3.75454518	12.82385267	3.323646354	7.207202383	-6.507549434
27.5	2.359253561	-0.283349102	-5.136985199	-8.989006575	-10.64045228	-33.69839116	-40.61702126	-23.87602621	27.5	-1.241127505	-1.263505562	-1.14967264	-1.166399631	-2.362149333	5.236517355	-4.039584179	-1.71564844	27.5	0.396108499	-0.192990804	-1.009645454	0.823692286	7.050592726	22.71120688	28.80992461	-1.641252593	27.5	-1.047808349	0.554493431	3.305572961	5.00724359	13.13207687	3.621737953	7.290643942	-8.835222036
27.6	0.403893952	-0.589255779	-4.880329035	-9.394874069	-9.419803469	-34.31690426	-40.50533428	-23.73215328	27.6	0.027398961	-2.246608778	0.609398231	-0.456290076	-2.50896167	6.125953921	-3.654044267	-2.465417681	27.6	0.695404882	-0.649654096	-0.997944969	0.694957391	6.521487663	21.77920113	28.25435979	-1.421828289	27.6	1.021934793	1.013677923	2.28364909	4.767863688	13.93944693	1.54974436	7.882969053	-6.254683781
27.7	0.947186386	1.21859588	-4.663096545	-8.038093206	-8.505036015	-34.19355407	-40.53900462	-23.36487517	27.7	0.081894131	-0.829261284	0.527884289	0.390316511	-3.230788994	5.833248433	-3.494833453	-1.742425913	27.7	0.452294101	-0.74758655	-1.338322704	1.051616362	6.411168187	20.14440683	27.86990894	-1.322932827	27.7	0.725133797	1.004871527	2.368377113	3.658615663	12.20632421	2.629257653	8.021039947	-6.43938711
27.8	0.941432911	-1.371468076	-3.111091086	-10.23577818	-8.672839269	-34.0014802	-40.30084857	-23.60079103	27.8	-0.105811456	-0.796975464	-0.494300545	0.479689567	-3.721692746	5.134636439	-3.728967003	-1.742425913	27.8	0.747268515	-0.298374641	-1.17664328	1.121259829	6.225874309	19.53027775	28.11991311	-1.527934877	27.8	0.655433717	1.021325968	2.451242466	3.468241384	11.5420208	1.770951145	7.34933693	-7.349566406
27.9	2.63131074	-0.117818699	-6.094417286	-9.327368387	-8.717906429	-33.99971806	-40.71721104	-24.04045242	27.9	-1.194201108	-0.872847141	-1.224665467	-1.163149701	-2.380500875	3.747115396	-4.807542222	-2.564651846	27.9	0.654346172	-0.45804712	-1.007518093	0.781484123	6.454010702	19.49676014	28.22102591	-1.565020675	27.9	-0.855188914	0.438251974	3.317277354	3.910334811	13.11153568	3.743608552	7.682277916	-7.293821827
28	-0.126247682	-0.534078977	-4.210931139	-9.183189585	-9.552128321	-34.25258595	-40.69585912	-23.29695999	28	-0.019527436	-1.751021443	-0.086730834	-0.155671614	-2.707770043	4.442493075	-3.727406112	-3.12225334	28	0.110858516	-0.729490336	-1.172388558	1.245773908	6.131620775	19.59731297	27.81324133	-1.199313501	28	1.173231011	0.735045969	2.522278198	4.42002934	13.07126247	0.360506036	7.017838003	-7.992652935
28.1	1.174859615	0.778804319	-4.439427536	-8.180605201	-8.871326547	-34.05698779	-40.45359694	-23.53645034	28.1	-0.387369836	-0.435374281	-0.396483815	0.034449251	-3.477005518	4.926023135	-4.048949521	-1.792830568	28.1	-0.057698292	-0.596429936	-1.259610353	0.953482384	6.537553607	19.37674548	27.20878681	-1.23742946	28.1	0.709159197	0.715229957	2.869548298	3.430245395	13.32385645	2.746972248	7.908726054	-7.887994964
28.2	0.89376126	-0.821322912	-3.719342059	-9.631560656	-8.306548738	-34.19179193	-40.56117777	-22.72236188	28.2	-0.211774287	-0.338516822	-1.281725226	0.244069691	-3.464771156	3.918534079	-5.069771798	-2.252773044	28.2	0.040626513	-0.280278426	-1.114949816	1.3217486	5.988098349	20.01466125	27.53657005	-0.428753031	28.2	0.214388499	0.411404265	2.404360101	3.419772806	10.79129093	2.911269395	7.382271328	-6.832560933
28.3	2.209663208	-0.007465097	-4.772517354	-9.156520674	-8.948036606	-33.99002626	-40.55542918	-24.16287846	28.3	-0.59324048	-1.650935401	-0.644286199	-1.187524171	-3.007511898	2.12510653	-5.491212187	-2.848178029	28.3	-0.310533504	-0.966870089	-0.929869423	0.888059733	6.678933907	20.57905452	27.39656772	-0.6914441	28.3	-0.320544905	0.306737938	3.523506044	2.995053803	11.29726574	1.860512082	7.996249047	-9.182637266
28.4	-0.498579714	-0.142972829	-4.231849823	-9.097349027	-9.159948144	-34.31337997	-40.76730594	-23.08338464	28.4	-0.22237057	-1.77846439	0.172483502	0.723434265	-3.091623133	3.048503402	-4.855929822	-2.731617265	28.4	-0.626037273	-0.456982637	-1.128777661	0.578884945	5.852073364	20.79205352	26.85322533	-0.704836194	28.4	1.009917285	0.597685909	2.496054544	3.984874442	12.23712814	2.649057453	8.44109791	-8.607278749
28.5	0.779513683	0.502920313	-4.809527334	-7.809740653	-8.149293117	-33.99443162	-40.65561896	-23.36487517	28.5	-0.674983235	-1.16341952	-0.702976237	0.365942041	-4.168246938	2.668471414	-4.509412169	-2.517397482	28.5	-0.219772146	-0.429306074	-1.317049095	0.588381781	5.887418439	19.59839418	26.76766835	-0.791369723	28.5	1.159296337	0.883612367	2.927233718	3.849168417	12.21090681	2.086532579	7.628317233	-6.998587939
28.6	0.873213135	-0.85053416	-3.432112433	-10.03659475	-7.865465899	-33.83848174	-40.69421667	-22.59099963	28.6	-1.401585507	-0.885761469	-1.110545948	0.092947978	-3.252199126	2.416194861	-4.70452346	-2.564651846	28.6	0.083846207	-0.330309137	-1.036237465	0.381561786	5.472917104	19.77355071	27.05211754	-0.279379678	28.6	0.19283958	0.49208731	1.798424931	2.768611679	12.43366205	2.492153889	6.650516116	-6.884445639
28.7	1.974592654	-0.235475113	-5.194913863	-8.725651076	-7.456984834	-33.69839116	-40.38050767	-23.86083466	28.7	-0.544800328	-2.532338284	0.278451626	-1.390644753	-2.357561447	0.600127109	-4.907439203	-3.416805542	28.7	-0.117125372	-0.239828065	-1.027728021	0.116705569	5.606799964	19.69894701	26.46766335	-0.393727555	28.7	-0.282421127	0.103948859	3.071299309	2.23819016	10.05875348	-0.169440918	7.456915237	-8.414699592
28.8	0.89376126	-0.328788821	-4.401612991	-9.143186218	-9.445693114	-34.05170135	-40.40103836	-23.03244826	28.8	-0.287462024	-1.512106375	0.148029319	0.351317359	-2.845406609	2.146129576	-4.595261137	-3.084449849	28.8	-0.675739921	-0.56768889	-1.07452996	-0.058458305	4.575366411	19.09563006	26.27432679	-0.773856985	28.8	0.896396036	0.259162532	2.32853471	3.802658929	11.37698657	3.503850757	7.974034767	-8.622984378
28.9	1.195407741	1.01492857	-4.365407576	-7.296364111	-8.081212939	-34.16183545	-40.38132889	-23.10483154	28.9	-0.582644196	-1.247362652	-1.254010486	0.101072802	-4.312000685	1.717582867	-4.534386414	-3.17108285	28.9	-0.219772146	-0.659234445	-1.724438696	-0.113328916	4.461833745	18.78315946	26.13876898	-1.227127849	28.9	1.200476698	0.510971049	2.901613741	3.606430905	12.41027677	2.263037158	7.46282411	-7.930829653
29	1.322806118	-1.309799887	-3.616357767	-9.946587171	-8.003544005	-33.84817354	-40.71310491	-22.93951171	29	-0.301085816	-1.662235438	-1.198581005	-0.295418575	-3.128326217	0.446497156	-5.065089127	-2.572527573	29	-0.622795796	-0.760360349	-1.426608178	0.162079343	4.246550106	17.44245513	25.35986711	-1.624770017	29	0.518422603	0.64478476	1.986720561	2.054889846	12.1482694	2.09701129	6.948647113	-7.111019372
29.1	2.156238082	-0.383965622	-5.22629189	-8.727317883	-6.704267381	-33.74508802	-40.14563653	-23.81794087	29.1	-0.369204779	-2.112622626	-0.235086209	-0.976278766	-2.616012332	0.556463859	-5.353853838	-4.095693237	29.1	-0.024203029	-0.593236487	-1.120268218	-0.061623917	4.247621169	18.62097748	25.8432085	-2.09658378	29.1	-0.542647605	0.138533823	3.338613284	2.223659554	10.59037576	-0.0002052	6.452817245	-6.863923504
29.2	0.433483252	-0.238720807	-4.396785603	-9.089014992	-9.430351102	-33.91337292	-40.29920612	-22.60976567	29.2	0.246893397	-1.266734144	0.209979915	0.684435114	-3.308783048	1.10791453	-4.649892299	-2.785172211	29.2	-0.594702994	-0.405887444	-1.093676207	0.082939039	4.123377875	17.63599229	26.76877948	-2.285103253	29.2	0.991117081	0.699063483	2.381853309	3.394283729	9.929122938	3.454652177	7.442113265	-9.558621661
29.3	0.777047908	1.025477076	-4.682406099	-7.621391467	-7.375480397	-33.79971453	-40.13824548	-22.74023429	29.3	-0.809707406	-1.344220112	-0.821986593	0.786807887	-4.438932185	0.949433105	-4.717010583	-3.026169467	29.3	-1.061475693	-0.793359328	-0.963907196	0.18740424	3.358638979	17.9160265	26.41877365	-2.107915552	29.3	1.116832707	0.681887345	2.97467578	3.482485988	11.79746249	2.132984275	8.113082132	-7.20013603
29.4	0.846911535	-1.52807282	-3.666240784	-9.858246402	-7.79546797	-33.51689017	-40.52504375	-22.19959376	29.4	0.384645077	-2.062579605	-0.037822469	-0.428665677	-3.24149406	-0.387956059	-5.920457029	-3.281343032	29.4	-0.875631008	-0.185539422	-0.986244485	-0.229401362	3.479669084	18.42419669	26.21432579	-1.997688319	29.4	1.01567278	0.543342374	2.231489553	2.918846206	11.92544133	1.827387225	5.929869258	-8.462601542
29.5	1.623630673	-0.478090753	-4.822400371	-8.815658651	-6.773306434	-33.95125905	-40.39364731	-23.53734396	29.5	0.361938757	-1.79622159	0.78057751	0.003574922	-2.755178193	-0.211685903	-5.559891362	-3.842094817	29.5	-1.300264505	-0.554915091	-1.184089043	-0.175585955	3.833119835	19.33565938	26.0721012	-1.020065477	29.5	-0.544354576	0.05930358	3.212907735	2.380880287	10.93089805	0.031274426	7.16097135	-7.426801706
29.6	0.351290751	-0.082927486	-4.349316281	-9.064012888	-9.207891931	-33.65874289	-40.20804984	-22.7232555	29.6	-0.143655324	-0.761461062	-0.416047161	0.409816087	-3.866975788	0.342999083	-5.116598508	-2.441790499	29.6	-1.694644215	-0.042898673	-0.671395081	0.074497406	3.074807316	19.45026798	26.31543859	-0.994311451	29.6	1.236124616	0.618227941	2.775423128	2.994457181	10.26510444	2.575796718	7.45930213	-10.0373258
29.7	0.787732934	-0.108081616	-4.758839753	-7.796406198	-8.318055247	-33.70191545	-40.2926363	-22.76346843	29.7	-1.15938475	-1.102076463	-0.885567467	-0.214170342	-4.126955969	-0.407361947	-5.066650017	-2.741068138	29.7	-1.395347832	-0.316470855	-0.942633588	0.012240367	3.021254172	19.64272392	26.27988244	-1.215796078	29.7	1.438816682	0.953589903	2.637241561	3.770899695	9.832058704	2.087346643	7.591528593	-8.157378606
29.8	0.59375863	-0.880556831	-4.097487505	-9.897416366	-7.674649627	-33.70191545	-40.3517647	-22.07895496	29.8	-0.107325211	-2.175579974	-0.228565094	-1.013652953	-2.946340091	-0.570694844	-6.173321262	-2.829276284	29.8	-2.166819376	-0.643267197	-1.021345939	0.021737204	2.915218947	20.04493522	26.34432796	-1.343536048	29.8	0.625689454	0.690331431	2.839003718	2.770529033	11.41950723	1.349903195	6.145000905	-7.628528179
29.9	1.14937994	-0.235475113	-3.707273587	-9.012341872	-7.257538681	-33.914254	-40.36818925	-22.96989481	29.9	0.227214585	-1.210233959	0.017607012	0.754308594	-3.041156392	-0.738879213	-5.413167671	-3.531791161	29.9	-1.547697255	-0.762489315	-0.79584569	0.419549132	3.209761239	20.29361425	26.12210204	-0.62242331	29.9	-0.278878809	0.536984465	3.221200679	3.381407262	11.06987421	0.55040319	6.741604684	-9.309047207
