# Supplementary material for: Highly localized intracellular Ca2+ signals promote optimal salivary gland fluid secretion
Source: eLife. 2021 Jul 9;10:e66170. doi: 10.7554/eLife.66170 (PMC8352588; doi:10.7554/eLife.66170)
Supplement: Figure 3—source data 1. [file elife-66170-fig3-data1.csv]

FIG3A
Stim(hz)	0	1	3	5	10	30	50	100
mouse1	0	0.1	0.4	1.5	2.7	0.9	0.5	0.7
mouse2	0	0.1	0.1	0.6	3.3	3.6	1.9	1.8
mouse3	0	0.1	0.1	1.5	1.6	1.2	0.5	0.4
mouse4	0	0	0.9	0.9	2.6	2	1.3	0.5
