# Supplementary material for: Highly localized intracellular Ca2+ signals promote optimal salivary gland fluid secretion
Source: eLife. 2021 Jul 9;10:e66170. doi: 10.7554/eLife.66170 (PMC8352588; doi:10.7554/eLife.66170)
Supplement: Figure 5—source data 1. [file elife-66170-fig5-data1.csv]

FIG5G						FIG5H						FIG5I
	1Hz	3Hz	5Hz	10Hz			1Hz	3Hz	5Hz	10Hz			1Hz	3Hz	5Hz	10Hz
0207mg3	46.5116279	97.6190476	83.3333333	90.2439024		0207mg3	7.505	3.43902439	2.21142857	1.94594595		0207mg3	6.34446512	42.9934286	46.8049524	58.4143902
0207mg4	85.7142857	100	93.877551	93.877551		0207mg4	5.78571429	1.80612245	0.98478261	0.71521739		0207mg4	17.116102	58.2265102	64.0679388	110.370388
0207mg5	40.3225806	100	100	98.4126984		0207mg5	5.18	2.95873016	2.4031746	1.02258065		0207mg5	7.65395161	43.840254	73.5251587	104.252492
0210mg1	73.4375	100	100	100		0210mg1	7.80851064	1.409375	0.796875	0.371875		0210mg1	8.31135938	48.2431406	77.7995156	170.379672
0210mg2	42.1875	100	100	100		0210mg2	7.95925926	2.70625	1.0859375	0.5109375		0210mg2	4.79676563	33.2930156	69.4120781	155.894922
0210mg3	23.4375	100	100	100		0210mg3	8.12	2.5546875	1.2953125	0.690625		0210mg3	5.6259375	51.5238438	94.5288438	215.966234
0210mg4	3.125	92.1875	100	100		0210mg4	11.9	3.29152542	1.475	0.90625		0210mg4	2.48560938	37.05225	77.4343594	188.899438
0420mg3	67.1875	67.1875	85.9375	96.875		0420mg3	7.31395349	7.31395349	4.25090909	2.23387097		0420mg3	8.14885938	8.14885938	16.4893281	40.7029375
0420mg7	14.0625	59.375	89.0625	96.875		0420mg7	11.9555556	6.82631579	3.65614035	1.53225806		0420mg7	4.86920313	8.89585938	19.9996563	60.312125
0421mg6	35.9375	54.6875	78.125	100		0421mg6	5.25217391	5.94	5.244	2.459375		0421mg6	4.45851563	7.32239063	13.97575	98.7245156
0421mg8	29.6875	40.625	64.0625	100		0421mg8	4.35263158	7.86923077	4.83170732	1.1640625		0421mg8	4.61479688	4.51482813	11.8805156	120.858766
0421mg10	37.5	78.125	96.875	100		0421mg10	8.57083333	5.614	2.02096774	1.0703125		0421mg10	5.3545625	13.0432188	29.0152344	107.208609
0423mg2	21.875	60.9375	73.4375	100		0423mg2	12.4214286	7.20769231	6.60425532	4.1046875		0423mg2	3.17332813	10.0451563	18.8358594	69.0420781
0423mg4	14.0625	73.4375	98.4375	100		0423mg4	10.2333333	4.9106383	3.40793651	2.184375		0423mg4	3.62004688	8.88689063	22.0385781	58.6320625
0423mg7	7.8125	23.4375	29.6875	100		0423mg7	0.32	3.79333333	8.11578947	4.7828125		0423mg7	3.37417188	4.78645313	5.30996875	70.8138281
0424mg23	16.6666667	69.047619	95.2380952	100		0424mg23	4.17142857	4.34137931	4.6425	1.38571429		0424mg23	5.10038095	7.78045238	16.7190952	85.5153333
0424mg1	35.7142857	78.5714286	100	96.4285714		0424mg1	4.635	3.66590909	1.4375	0.66851852		0424mg1	5.11583929	15.4041607	29.6467143	71.1220357
0427mg22	18.75	71.875	93.75	100		0427mg22	2.34166667	6.27391304	4.37833333	2.090625		0427mg22	4.18775	11.7810156	27.3904844	66.2328594
0427mg23	32.8125	45.3125	85.9375	98.4375		0427mg23	1.86666667	6.75517241	5.28181818	2.51904762		0427mg23	5.52582813	9.78220313	19.144375	49.2777344
