# Supplementary material for: Highly localized intracellular Ca2+ signals promote optimal salivary gland fluid secretion
Source: eLife. 2021 Jul 9;10:e66170. doi: 10.7554/eLife.66170 (PMC8352588; doi:10.7554/eLife.66170)
Supplement: Figure 6—source data 1. [file elife-66170-fig6-data1.csv]

FIG6D																	FIG6E			Fig6F																	Fig6G
1Hz	1Hz	1Hz	1Hz	3Hz	3Hz	3Hz	3Hz	5Hz	5Hz	5Hz	5Hz	10Hz	10Hz	10Hz	10Hz		sorted grid	Slope of [Ca2+] ΔF/F by stimualtion		1Hz	1Hz	1Hz	1Hz	3Hz	3Hz	3Hz	3Hz	5Hz	5Hz	5Hz	5Hz	10Hz	10Hz	10Hz	10Hz		sorted grid	Slope of sdev ΔF/F by stimualtion
1.95775	3.159	4.281	2.778333	11.92075	2.4565	4.007	3.218	22.72825	2.479	2.571667	2.064333	71.08025	7.638	72.748	41.63233		1	5.238345		1.0305	1.202	1.243667	1.088667	3.336	1.2745	1.336333	1.118667	6.96	1.403	1.284	1.220333	19.871	2.0495	20.66067	12.704		1	1.471887
2.49475	3.4965	8.227	2.581667	16.74725	3.342	3.785	3.662	29.56425	3.941	2.892	2.388	92.59775	11.869	74.569	16.98933		2	5.181347		1.0945	1.2045	1.813	1.177667	5.2655	1.199	1.178333	1.385667	7.9745	1.3625	1.190667	1.593333	16.6105	3.2365	19.83633	5.203667		2	1.134301
2.32575	4.583	3.921333	3.179333	11.61225	3.305	3.816667	3.52	36.7085	4.2825	3.688333	2.767333	122.1708	5.812	82.62833	48.759		3	7.163324		0.9765	2.4405	1.192	1.121333	3.976	1.4415	1.356667	1.286	9.745	1.6645	1.650667	1.437667	32.606	1.843	22.657	15.073		3	1.93836
2.98625	4.024	3.809333	3.756	16.07975	3.143	3.05	4.648667	38.7815	4.506	3.756333	3.104667	108.7343	20.049	97.26067	41.48933		4	7.347539		1.096	1.4675	1.180667	1.217333	5.502	1.2745	1.188333	1.476	8.8885	1.629	1.347667	1.556667	23.4915	4.994	27.50767	12.487		4	1.831166
3.59175	2.9665	6.164333	3.147	19.568	1.94	5.737667	3.91	43.9605	4.62	3.848667	3.81	112.832	18.454	69.20267	44.76		5	6.6357		1.2765	1.449	1.558333	1.364667	5.645	1.3325	1.692667	1.571	10.7815	1.7255	1.473	1.889	29.5805	4.9525	20.38167	13.31067		5	1.804728
2.573	3.5895	4.978	2.597	18.8575	2.857	4.032667	3.936	45.19575	4.6565	4.193667	4.339333	133.2605	21.445	59.63867	14.20033		6	6.207325		1.1445	1.4775	1.345667	1.080667	5.013	1.513	1.373	1.290333	11.411	1.5585	1.505333	1.584667	29.8535	5.6465	15.161	4.419333		6	1.442377
3.2605	4.067	4.176	2.796	26.0645	4.7185	3.235333	4.071	46.54525	5.5305	6.141667	4.489	121.346	30.9515	74.405	32.23533		7	7.012623		1.1315	1.3255	1.474667	1.228333	7.1725	1.3795	1.410333	1.418	11.137	1.5475	2.001	1.63	27.1855	6.945	20.733	9.822667		7	1.70068
3.2775	3.688	5.821333	3.466	24.627	3.587	5.131	4.134333	48.103	6.324	6.226333	5.032667	123.4045	34.345	107.473	36.92533		8	8.244023		1.2155	1.5545	1.602	1.139333	6.7935	1.3645	1.726	1.494667	12.127	2.0365	2.013667	2.014667	32.5895	9.9225	27.24533	12.31667		8	2.206045
2.90625	4.517	4.223667	3.825333	27.1565	4.031	2.754333	3.508667	48.83125	6.8995	6.770667	5.197	142.7415	39.269	70.49933	24.43633		9	7.524454		1.084	1.4225	1.19	1.241667	6.496	1.495	1.348	1.287667	12.3135	2.1225	1.796	1.894667	27.804	9.3025	18.15633	6.484		9	1.62893
4.52675	4.508	4.469667	2.231667	28.53825	4.348	4.462667	3.868	50.3805	7.038	7.283667	5.343	131.0228	32.557	91.37133	67.00967		10	8.810573		1.729	1.4755	1.354	1.010667	9.557	1.424	1.432	1.496667	12.3565	1.662	2.076667	1.770667	29.619	8.8785	24.04733	21.51267		10	2.237637
2.686	4.3825	5.564	1.964	26.01025	4.2405	3.593333	4.461667	51.65375	7.1395	7.414333	5.429	134.91	34.218	76.907	54.18		11	8.223684		1.062	1.184	1.400667	1.204333	7.4555	1.328	1.460667	1.408667	12.1485	2.009	2.133	2.07	29.685	9.1135	21.588	16.76033		11	2.072968
2.83625	5.4575	4.028	4.21	27.91475	5.3315	4.573333	3.029667	52.818	7.742	7.588	5.832333	142.5853	45.5585	49.87067	47.03033		12	7.716049		1.0115	1.8555	1.275667	1.441333	8.556	2.1655	1.404667	1.516	14.049	2.523	2.066667	2.02	32.655	10.709	12.674	13.42067		12	1.815541
2.68325	6.1185	4.746333	2.531667	30.218	6.439	4.375667	4.070333	54.8365	8.552	7.700333	6.005333	134.7118	31.5795	71.68433	25.41933		13	7.057163		1.082	1.451	1.332	1.051667	8.4955	1.728	1.451333	1.191	15.3745	1.893	2.154333	1.789667	34.2875	5.6835	21.53133	7.652333		13	1.829157
3.48525	3.4595	5.680333	3.105333	31.75225	4.0425	4.301	4.410333	55.79375	8.5755	7.871	6.896	151.1285	21.207	72.04867	52.30433		14	8.045052		1.532	1.587	1.454333	1.297	9.244	1.4175	1.379333	1.49	14.148	1.8575	2.107	2.326	30.6	5.8675	18.55533	16.29967		14	1.864976
7.06525	3.9365	3.659	3.504667	30.133	5.69	4.218	4.611	56.18875	9.2365	8.4	7.113	146.3008	16.7735	140.0843	64.026		15	10.06543		1.391	1.627	1.075	1.298	7.843	1.701	1.306667	1.496333	12.8715	1.965	2.281667	2.164667	30.5265	4.3085	35.343	20.45833		15	2.451581
2.41025	4.3595	4.676667	3.622333	26.54875	5.813	3.906667	4.870667	57.56025	9.505	8.744	7.159	156.3893	29.2415	73.884	72.75167		16	9.140768		1.11	1.6335	1.358667	1.310333	8.2005	1.829	1.428333	1.682333	15.328	2.2945	2.191	2.259	37.912	6.4315	17.439	21.705		16	2.237637
6.76025	4.637	4.307667	3.875333	31.291	5.963	4.288333	3.328333	58.94975	10.285	9.154333	7.525333	161.1888	29.5255	131.6993	70.91833		17	10.80731		2.285	1.2305	1.253	1.473	8.205	1.651	1.383333	1.738333	13.98	2.515	3.079667	2.468333	32.2585	8.2125	36.84633	23.48067		17	2.729258
3.51175	5.5785	4.815	3.118333	39.66675	7.0695	7.384333	4.53	60.7325	10.4975	9.185333	7.623	150.2148	28.9745	61.95433	42.36733		18	7.507508		1.1005	1.37	1.305333	1.203667	9.0925	1.6475	1.976	1.483333	15.53	2.807	3.045	2.386333	30.2955	7.3025	15.45933	11.20233		18	1.674761
2.3985	3.6275	3.647	3.031667	22.896	4.187	5.898333	6.113667	61.046	10.669	9.363667	7.71	188.4638	38.401	76.145	72.064		19	10.47669		1.055	1.286	1.152333	1.521667	9.085	1.419	1.555	2.017333	15.187	2.251	2.529	3.242	41.743	10.223	22.31	24.628		19	2.690342
3.44825	4.739	4.042667	2.770333	27.91125	7.0775	3.482333	4.819	62.49725	10.9645	9.722333	7.987	164.1033	31.25	137.0137	30.18267		20	10.02305		1.2745	1.49	1.18	1.14	8.2115	1.7225	1.322	1.618333	14.324	2.8045	2.843667	2.227	33.1715	8.5115	34.28667	8.606667		20	2.279462
4.484	4.486	4.943667	2.646	31.77775	4.8655	4.272	3.429333	63.2375	11.465	9.936667	8.088	150.6605	35.8645	96.222	40.85233		21	8.841733		1.654	1.1865	1.327	1.176333	8.5745	1.3155	1.633	1.223	14.9805	2.447	2.459333	2.392	29.2405	8.0495	27.03467	11.708		21	2.024701
5.07	5.462	4.369333	3.380333	36.589	4.6945	7.634333	4.521	64.11575	11.7685	10.383	8.217333	166.223	33.0535	86.216	45.143		22	8.920607		1.629	1.595	1.332333	1.190333	8.5325	1.7315	2.062	1.433667	13.5495	2.989	3.328	2.206	29.4915	9.3295	25.79967	13.88767		22	2.07857
5.043	6.913	3.634667	3.676667	30.94875	8.04	7.787333	4.274333	64.983	12.2025	10.67967	8.436667	155.284	38.9885	97.28567	48.227		23	9.199632		1.3845	1.481	1.164667	1.595333	7.5305	1.812	2.118333	1.657333	15.012	2.7055	2.567333	2.705	36.405	9.9535	29.158	17.026		23	2.5
2.9605	4.0295	6.011667	3.205333	30.6595	4.7555	6.140667	4.981333	66.8385	12.2665	10.93167	8.841	163.7318	44.403	58.55467	81.58367		24	9.560229		1.162	1.222	1.427	1.215333	6.868	1.36	1.592667	1.684	14.584	2.895	2.709	3.091333	33.731	10.587	16.766	25.38133		24	2.350729
4.96575	5.7865	3.911667	4.182	29.719	6.5655	12.72533	6.451333	68.6735	12.6755	11.23933	9.752333	175.695	36.257	82.81233	44.25533		25	9.149131		2.214	1.7935	1.174333	1.384667	8.6905	2.0435	3.127667	1.635333	13.915	3.177	2.805667	2.712333	31.4345	9.8575	19.75633	13.85433		25	1.939488
3.565	6.305	3.101333	3.131	38.603	7.257	5.761	3.973	69.72925	12.971	11.57067	10.40933	177.9425	39.194	97.17567	43.10567		26	9.746589		1.2945	1.592	1.131333	1.416667	8.314	1.647	1.570667	1.664667	15.854	2.4575	2.673	3.025333	39.6265	9.777	24.84867	13.63		26	2.367985
3.0955	5.224	5.738333	3.710333	33.6925	5.4995	8.247667	6.318667	69.94075	13.2585	11.92567	10.66833	150.8098	46.766	130.247	63.798		27	10.73653		1.322	1.2875	1.306667	1.374	7.291	1.654	1.894667	2.075667	15.4835	3.3395	2.996333	3.244333	33.087	11.5395	37.01933	19.88833		27	2.776235
4.745	2.027	4.442333	3.721333	41.51825	3.514	5.458667	4.295	72.578	13.491	12.05233	10.88467	190.443	37.483	96.07733	49.24033		28	10.25115		1.2895	1.3315	1.273333	1.321	9.8165	1.4765	1.786667	1.614667	15.5375	3.318	2.827333	2.901	41.1465	10.321	26.80933	14.88167		28	2.513826
3.70875	8.608	4.803	3.710667	35.80875	9.212	6.967	4.121	74.64125	14.557	12.63867	11.12333	185.1378	32.8875	94.464	47.815		29	9.737098		1.3	1.526	1.537	1.327333	8.838	2.2525	1.975667	1.589333	17.7035	3.6875	3.258	2.843333	40.559	8.3635	25.53267	14.73567		29	2.391772
5.1425	2.9525	3.515333	3.788333	49.003	4.9465	12.44967	6.663333	75.64625	15.116	12.91267	11.62467	180.9573	52.8615	112.391	59.592		30	11.02657		1.852	1.2	1.152	1.305	11.8005	1.447	2.884	1.830667	16.3975	3.8805	2.75	2.884667	36.039	14.519	27.46867	19.02533		30	2.591345
3.5575	6.1605	5.188667	4.030667	42.904	8.418	6.979667	6.312	76.46625	16.281	13.46133	12.88867	171.2045	52.861	132.2427	48.83467		31	11.0205		1.68	1.555	1.163333	1.398	9.961	2.297	1.883	1.915333	17.011	3.8485	3.111667	4.031667	30.9265	12.8095	36.86433	14.73433		31	2.556891
3.85625	8.318	6.550333	4.108	37.30425	8.6185	5.659667	8.664	77.952	17.0015	14.072	13.16967	198.7658	61.0575	61.467	58.74633		32	10.2501		1.638	1.49	1.496333	1.486	8.5325	1.9815	1.726667	2.263667	18.638	4.3935	3.360667	4.153667	44.3345	14.7135	16.13867	17.83067		32	2.501251
2.24425	9.2185	8.955	3.573667	34.699	12.393	5.324333	5.712333	78.211	17.309	14.40633	13.78567	204.4448	48.3635	109.196	63.07367		33	11.56872		1.01	1.5895	1.892667	1.334	10.0185	2.858	1.850667	1.631333	15.939	4.204	3.959333	3.243667	41.883	12.393	30.29833	19.108		33	2.797203
3.2835	5.9845	4.746667	3.055333	44.0925	7.5055	11.78333	3.763	78.64425	17.4715	14.68667	14.04367	184.0208	56.6645	100.369	54.81967		34	10.77122		1.167	1.5785	1.357333	1.077667	11.0575	2.426	2.983333	1.343333	18.1715	4.5705	3.834333	3.799333	40.5095	16.062	27.02933	16.831		34	2.705628
5.21775	5.615	3.698333	3.125	42.551	9.4235	7.801333	6.467333	79.9875	17.5855	15.73533	14.43567	183.2903	51.924	95.27267	65.93533		35	10.78749		1.182	1.4085	1.147667	1.196667	11.895	2.1185	1.743	1.910667	19.0685	4.2835	3.199333	4.143667	39.8065	13.0905	24.864	21.78267		35	2.686006
4.35925	10.67	6.170667	2.834333	42.36675	12.2465	9.797333	7.843333	80.79275	18.562	16.60933	14.65567	186.1483	49.1075	128.5407	64.899		36	11.54601		1.3685	1.416	1.369333	1.144667	12.4335	2.7165	2.476667	1.899333	20.3635	4.778	3.477333	4.097333	37.6485	12.569	31.646	19.35533		36	2.712232
9.0645	6.0985	4.860667	3.576333	46.3535	6.7785	6.366667	10.12267	81.91325	19.2105	17.099	14.793	185.263	64.3695	107.148	59.39133		37	11.21705		2.909	1.513	1.138333	1.339	9.208	1.9745	1.702667	2.800667	16.994	4.0705	4.388	4.403667	34.162	16.5295	27.23967	19.78633		37	2.609603
5.538	4.576	3.816667	5.468667	51.59775	5.195	6.531	11.35367	83.106	20.04	17.475	15.58767	191.233	59.6995	149.704	58.305		38	12.51408		1.513	1.226	1.154667	1.566	11.318	1.556	1.915	3.048	18.9635	4.8195	4.368333	4.471	40.7325	15.1285	42.18933	16.665		38	3.121099
4.97625	12.556	3.849667	3.513333	44.41825	14.815	6.032333	11.386	84.9885	20.1535	17.807	16.38567	182.0023	56.872	105.4167	71.86833		39	11.12966		1.534	1.302	1.118333	1.441333	11.6	3.591	1.585667	2.935	17.797	4.124	3.459667	4.889667	36.605	14.2275	27.82133	21.21533		39	2.665956
3.5295	6.213	4.477	3.516333	40.49975	6.5265	7.160333	10.27767	86.53075	20.642	18.24433	16.487	202.6258	42.694	135.5203	65.84333		40	12.2971		1.2345	1.498	1.323333	1.586333	10.4265	1.8415	2.227667	2.979667	19.461	4.5875	5.227333	4.222333	37.2155	11.34	38.349	19.80467		40	2.88767
4.72325	5.79	4.180667	3.772333	44.934	9.1965	4.206	11.54067	89.33075	21.1875	18.99433	17.14067	194.8443	60.831	96.92	62.207		41	11.30071		1.2675	1.472	1.155333	1.651	11.668	2.356	1.419667	3.115667	22.2295	4.9595	4.964333	4.926333	49.4455	16.9075	24.42133	19.93967		41	3.0012
3.638	5.378	4.238	3.940333	41.76675	7.8925	8.464667	9.993	89.9635	21.668	19.83967	17.55467	193.9738	64.4855	119.6013	85.05967		42	12.76487		1.5175	1.3055	1.162333	1.250333	13.1665	1.8765	1.902667	2.653333	24.3765	5.234	4.889	4.819667	49.17	18.4825	32.29267	25.37167		42	3.429355
5.53775	7.6725	4.935	3.882333	49.138	10.861	8.501	8.176333	90.86025	22.7675	20.564	17.711	214.2078	57.3265	124.4317	75.85		43	12.83862		1.9145	1.325	1.282333	1.327	11.542	2.9145	2.468	2.415667	21.976	5.7815	4.515667	4.690667	52.2275	14.6545	29.63133	22.78833		43	3.239391
7.3205	7.046	4.212667	3.185667	46.253	11.084	8.378333	9.962	91.19425	23.466	20.87833	18.44133	204.7248	77.8885	108.8097	62.225		44	12.32438		2.0515	1.1755	1.121667	1.222	10.2705	2.4725	2.297	2.443333	19.3055	6.371	6.123	5.211333	34.8205	21.413	28.65567	18.73833		44	2.803476
4.8525	4.849	4.040333	3.413667	53.192	5.794	7.258667	11.92433	94.04725	24.4185	22.40133	18.97167	211.984	66.3485	96.72667	78.305		45	12.39618		1.6725	1.576	1.209333	1.344333	14.545	1.9305	1.697667	3.301	20.82	5.6895	4.361333	5.635667	44.336	16.492	23.913	25.20367		45	2.943774
4.40625	8.232	3.738667	3.632333	53.1205	12.6115	6.835	8.331333	94.706	24.511	22.663	19.679	218.6898	58.145	100.0817	75.54133		46	12.28652		1.3075	2.623	1.196667	1.233	13.2365	3.231	1.860667	2.483667	20.871	4.862	5.831333	4.558	42.617	14.1325	28.9	22.65233		46	2.890173
4.01325	9.949	3.867667	3.254333	47.47375	13.5345	9.530333	7.972	96.21975	24.984	23.26667	20.13733	224.9425	60.4105	153.472	93.75433		47	14.64129		1.554	1.651	1.096333	1.391667	13.0985	2.833	2.115	2.469	21.283	6.146	5.842	5.543667	49.192	14.8545	40.02667	26.128		47	3.55366
4.062	7.4905	4.354333	2.683333	52.8185	11.785	9.085333	7.767333	97.521	25.824	23.63433	21.52433	206.6568	64.9265	129.8307	69.87933		48	12.87167		1.3715	1.267	1.271667	1.589333	10.756	2.6205	2.163333	2.831333	19.584	6.12	6.172667	6.355667	43.91	17.3065	35.17733	22.95367		48	3.259452
4.866	5.653	5.278333	3.258	49.29625	10.7425	11.774	7.717333	99.55875	26.087	23.97133	22.024	226.864	85.836	111.6037	104.5833		49	14.57513		1.515	1.247	1.31	1.334667	11.3605	2.275	2.8	2.211667	20.482	6.7585	6.176333	6.300333	48.044	21.338	31.39333	31.969		49	3.653635
4.84675	8.225	6.184	3.456333	58.31	12.0335	11.93733	8.054	101.109	26.3915	24.44433	23.27667	214.9903	54.896	109.7807	76.73067		50	12.27144		1.591	1.4885	1.455	1.234	14.547	2.963	2.796	1.832667	23.0335	5.3935	6.079333	5.055	43.2475	13.1005	31.10367	23.715		50	2.97885
3.743	8.7865	3.879667	3.072333	61.898	13.1535	9.335333	11.66733	102.1705	27.7855	25.46833	23.83933	234.5413	58.125	111.143	95.59233		51	13.55014		1.2585	1.423	1.310667	1.214667	14.0995	2.6725	2.564333	2.957	22.428	5.7445	6.340667	5.523	46.8015	15.21	28.58933	28.39067		51	3.218539
7.2905	10.564	5.558	3.331	64.70775	14.2185	8.235	10.62533	103.4153	27.9365	26.67333	24.15767	218.1473	49.3845	114.48	92.16033		52	12.64542		1.804	1.628	1.286	1.178	17.0705	3.282	1.973	2.899	23.5885	6.277	5.249333	7.029	43.3665	13.484	30.617	27.52533		52	3.061849
4.00425	13.453	6.476	3.225	57.69225	15.4635	15.86333	9.624	105.7045	29.016	27.98	25.698	216.981	81.5755	93.84167	88.66633		53	12.83862		1.303	1.496	1.665667	1.268	12.789	4.015	4.655333	2.594333	23.427	6.4025	6.291	6.005667	43.613	18.583	25.27033	26.14233		53	3.035823
10.251	6.4235	4.109333	3.154	56.535	10.096	13.80067	14.32767	107.0348	29.912	30.262	27.20067	212.3385	64.1075	114.4913	110.9123		54	13.563		3.5495	1.3285	1.192667	1.243667	12.577	2.287	3.336333	3.514667	21.4845	6.6805	5.958	8.217	38.0445	16.108	28.358	33.29133		54	3.090235
5.601	9.3795	5.159333	3.699	57.7775	12.5135	12.69567	9.382	111.9885	30.7375	31.06533	27.55067	229.6953	66.5485	141.9693	102.362		55	14.73405		1.4555	1.3745	1.332667	1.324333	12.148	2.9965	3.016	2.806	22.51	6.159	8.023	6.293333	48.491	16.1515	36.907	28.947		55	3.567606
3.685	7.17	5.837667	2.718333	64.0595	9.129	15.28633	8.136667	114.3385	30.873	32.64633	27.84	249.1273	54.039	179.2693	78.33867		56	15.38225		1.297	1.288	1.358333	1.138667	15.185	2.0695	4.150333	1.977333	23.3825	6.7655	8.933	6.868	48.529	13.6815	47.815	24.21233		56	3.665689
16.1925	5.668	3.797667	3.486	73.54525	15.971	12.98633	11.16567	116.5395	31.321	34.59233	28.174	227.631	85.2265	161.2623	99.21333		57	15.38698		4.7765	1.188	1.091667	1.264333	19.108	3.403	3.131333	2.922333	25.518	6.931	8.887	7.867667	42.6115	21.31	42.48933	30.74167		57	3.637686
4.88975	8.2005	4.442	3.039667	65.04075	15.6835	15.149	12.66933	117.8405	32.5265	36.17967	29.42333	236.4088	76.716	163.0753	92.954		58	15.50147		1.535	1.4085	1.477	1.320333	12.5015	4.18	3.475	3.322	22.8825	8.156	8.357	6.237667	41.676	20.463	45.38033	28.274		58	3.696858
13.18775	6.0055	5.18	3.332333	72.957	8.8195	13.949	14.73467	121.0083	33.028	40.121	31.28	231.2568	65.0645	161.7073	93.17633		59	14.8214		2.334	1.414	1.237667	1.127	17.7215	2.3975	3.840333	3.234333	27.976	7.5725	10.675	7.244333	55.2295	17.941	41.44633	23.61167		59	3.735525
10.5615	11.631	6.590667	3.360667	60.2695	14.159	21.49567	15.96533	122.1005	33.596	43.384	31.96967	250.6853	88.6755	163.0817	92.869		60	16.01537		2.9575	1.311	1.405333	1.355667	13.8065	3.1595	4.402	4.552	24.2	8.4985	10.61133	9.964	53.4245	23.3275	45.36433	26.706		60	4.038772
9.89725	10.5495	3.764	4.259	65.31425	15.5145	16.69633	15.73633	125.0753	36.3775	45.12533	33.86833	232.5138	107.2425	162.4093	116.6203		61	16.78134		2.489	1.2905	1.034	1.372667	15.8675	3.5605	3.784667	4.023667	27.4985	10.152	10.55033	8.568333	46.4865	26.9125	43.514	35.06733		61	4.140787
14.46175	9.587	6.32	3.467	81.24525	16.969	13.44233	23.45467	134.0508	38.9945	47.27	38.883	235.2545	89.236	198.418	103.1853		62	16.69449		4.258	1.3885	1.357667	1.588	16.947	3.6525	3.340333	4.724667	27.5395	8.99	12.08833	9.675	54.058	21.011	55.25367	31.44133		62	4.364906
13.40475	11.9585	4.763333	4.373	79.02475	18.8725	25.38533	23.40667	145.0208	42.563	52.59133	41.14067	262.0518	105.6635	147.0457	120.186		63	16.85772		2.465	1.3225	1.157	1.519667	13.4755	4.547	5.913667	5.827	25.443	9.9	12.82133	9.976667	48.9565	27.5455	38.54433	37.43567		63	4.127115
18.4865	14.8185	4.864	3.866	84.8065	18.4815	13.57833	20.009	154.1475	44.204	70.19267	45.688	274.6653	119.2935	140.698	129.028		64	17.68659		2.2425	1.223	1.334333	1.426	18.288	4.0735	2.954333	5.303	30.2075	10.0905	11.79533	11.97533	56.2235	27.242	39.89633	38.04467		64	4.393673
