# Supplementary material for: Highly localized intracellular Ca2+ signals promote optimal salivary gland fluid secretion
Source: eLife. 2021 Jul 9;10:e66170. doi: 10.7554/eLife.66170 (PMC8352588; doi:10.7554/eLife.66170)
Supplement: Figure 7—source data 1. [file elife-66170-fig7-data1.csv]

FIG7E												FIG7G												FIG6G
	Control	Control	Control	Control	Control	Physostigmine	Physostigmine	Physostigmine	Physostigmine	Physostigmine			Control	Control	Control	Control	Control	Physostigmine	Physostigmine	Physostigmine	Physostigmine	Physostigmine			Control	Control	Control	Control	Control	Physostigmine	Physostigmine	Physostigmine	Physostigmine	Physostigmine
	0421mg10vs13	0423mg7vs10	0424mg23vs26			0421mg10vs13	0423mg7vs10	0424mg23vs26					0421mg10vs13	0423mg7vs10	0424mg23vs26			0421mg10vs13	0423mg7vs10	0424mg23vs26					0421mg10vs13	0423mg7vs10	0424mg23vs26			0421mg10vs13	0423mg7vs10	0424mg23vs26
1Hz	37.5	7.8125	16.6666667	18.75	32.8125	89.0625	6.25	28.5714286	18.75	35.9375		1Hz	8.57083333	0.32	4.17142857	2.34166667	1.86666667	4.13859649	13.875	3.14166667	6.38333333	5.60869565		1Hz	5.3545625	3.37417188	5.10038095	4.18775	5.52582813	13.8071563	3.63889063	5.14216667	8.29895313	7.46126563
3Hz	78.125	23.4375	69.047619	71.875	45.3125	98.4375	50	95.2380952	100	95.3125		3Hz	5.614	3.79333333	4.34137931	6.27391304	6.75517241	1.6952381	10.009375	2.245	4.0265625	4.80655738		3Hz	13.0432188	4.78645313	7.78045238	11.7810156	9.78220313	38.7529219	5.29209375	25.5015952	52.9506563	39.7707813
5Hz	96.875	29.6875	95.2380952	93.75	85.9375	100	68.75	100	100	96.875		5Hz	2.02096774	8.11578947	4.6425	4.37833333	5.28181818	1.1234375	6.96818182	1.21714286	2.61875	2.83225806		5Hz	29.0152344	5.30996875	16.7190952	27.3904844	19.144375	82.7193125	11.1578438	66.4778857	97.1023125	36.2614219
10Hz	100	100	100	100	98.4375	100	100	100	100	98.4375		10Hz	1.0703125	4.7828125	1.38571429	2.090625	2.51904762	0.79375	3.66875	0.65428571	1.46875	1.25714286		10Hz	107.208609	70.8138281	85.5153333	66.2328594	49.2777344	196.210453	129.890672	179.095257	103.981234	86.1729375
