# Supplementary material for: Highly localized intracellular Ca2+ signals promote optimal salivary gland fluid secretion
Source: eLife. 2021 Jul 9;10:e66170. doi: 10.7554/eLife.66170 (PMC8352588; doi:10.7554/eLife.66170)
Supplement: Figure 10—source data 1. [file elife-66170-fig10-data1.csv]

FIG10E	Apical	Apical	Apical	Apical	Apical	Apical	Apical	Apical	Apical	Apical	Cytosolic	Cytosolic	Cytosolic	Cytosolic	Cytosolic	Cytosolic	Cytosolic	Cytosolic	Cytosolic	Cytosolic	Basal	Basal	Basal	Basal	Basal	Basal	Basal	Basal	Basal	Basal
	Mouse1-cell1	Mouse1-cell2	Mouse1-cell3	Mouse1-cell4	Mouse2-cell1	Mouse2-cell2	Mouse2-cell3	Mouse2-cell4	Mouse3-cell1	Mouse3-cell2	Mouse1-cell1	Mouse1-cell2	Mouse1-cell3	Mouse1-cell4	Mouse2-cell1	Mouse2-cell2	Mouse2-cell3	Mouse2-cell4	Mouse3-cell1	Mouse3-cell2	Mouse1-cell1	Mouse1-cell2	Mouse1-cell3	Mouse1-cell4	Mouse2-cell1	Mouse2-cell2	Mouse2-cell3	Mouse2-cell4	Mouse3-cell1	Mouse3-cell2
1Hz	-7.57734	-9.26068	-15.6913	-12.8526	-1.08625	-3.52775	1.095804	-7.62148	16.54537	6.296303	-0.50635	-11.36	-11.5879	-12.3184	-3.84321	-13.6509	-6.29239	-5.41685	2.59287	3.823122	2.239872	-3.12853	8.828038	3.468718	-1.21593	-8.4238	15.13851	-1.32837	-11.9933	31.17363
3Hz	74.07329	53.66094	65.47213	6.377388	92.98137	114.2761	44.99028	27.61225	46.42033	86.44633	3.1471	46.22065	75.47023	0.927889	51.25864	67.51882	9.77756	4.909681	17.37669	22.54177	14.71825	31.00063	29.7703	55.77673	18.85857	23.68025	29.84882	4.462225	-18.4198	13.84613
5Hz	130.0382	158.9765	121.7922	62.02187	167.0145	209.1363	174.598	113.1906	84.43426	140.4276	41.89054	135.5858	97.10962	42.66785	118.4013	232.8926	49.90056	47.65229	12.85715	36.80784	66.12241	61.00404	36.69355	29.66571	52.08624	109.8496	41.76982	13.53584	-32.4007	41.88312
10Hz	322.5218	334.0369	544.2907	194.1735	315.6274	401.1752	315.3122	292.9903	250.1899	318.169	225.9465	243.3748	360.454	122.1781	266.2809	304.9687	198.0958	193.1928	80.08124	106.2082	89.55601	118.4483	85.02176	71.6006	115.6332	117.0688	128.3228	50.61322	31.65357	111.5351
FIG10F	Apical	Apical	Apical	Apical	Apical	Apical	Apical	Apical	Apical	Apical	Cytosolic	Cytosolic	Cytosolic	Cytosolic	Cytosolic	Cytosolic	Cytosolic	Cytosolic	Cytosolic	Cytosolic	Basal	Basal	Basal	Basal	Basal	Basal	Basal	Basal	Basal	Basal
	Mouse1-cell1	Mouse1-cell2	Mouse1-cell3	Mouse1-cell4	Mouse2-cell1	Mouse2-cell2	Mouse2-cell3	Mouse2-cell4	Mouse3-cell1	Mouse3-cell2	Mouse1-cell1	Mouse1-cell2	Mouse1-cell3	Mouse1-cell4	Mouse2-cell1	Mouse2-cell2	Mouse2-cell3	Mouse2-cell4	Mouse3-cell1	Mouse3-cell2	Mouse1-cell1	Mouse1-cell2	Mouse1-cell3	Mouse1-cell4	Mouse2-cell1	Mouse2-cell2	Mouse2-cell3	Mouse2-cell4	Mouse3-cell1	Mouse3-cell2
1Hz	21.24478	25.06192	34.27466	18.34499	50.38132	17.20465	46.27105	14.9715	110.2303	165.6669	33.34805	22.37559	35.09082	21.31334	19.0518	17.53119	41.6528	14.81841	50.74874	144.2865	32.93809	25.81607	49.24361	42.12764	36.21155	18.11468	58.95324	25.17427	19.57784	237.772
3Hz	314.2692	251.3547	237.3259	66.66073	332.4939	412.3234	171.9379	118.2467	159.3286	569.9433	58.35084	227.9372	224.3869	41.7463	179.4516	254.9176	121.7848	51.17676	86.40806	119.1868	70.34986	96.60371	91.99454	204.0488	70.58532	166.0964	76.0239	37.28781	33.49993	95.37803
5Hz	318.6978	348.6556	307.435	149.7447	353.8795	475.9426	445.883	242.3063	224.0386	503.7244	122.7823	336.6092	277.1982	117.6914	258.9456	508.5685	288.8954	149.361	69.89359	134.936	125.4824	152.5097	160.6122	80.02575	104.2454	307.547	150.0469	58.29075	86.8158	144.1684
10Hz	476.435	556.5764	770.1053	337.3039	481.4146	734.7498	666.5615	531.1487	548.2471	926.4621	356.0533	399.1764	517.9623	212.0941	445.4579	594.8158	475.9279	433.535	285.3454	344.3733	165.8106	208.5279	226.6924	142.4292	207.6876	279.3211	262.0932	132.5832	174.1231	262.9473
