# Supplementary material for: Highly localized intracellular Ca2+ signals promote optimal salivary gland fluid secretion
Source: eLife. 2021 Jul 9;10:e66170. doi: 10.7554/eLife.66170 (PMC8352588; doi:10.7554/eLife.66170)
Supplement: Figure 11—source data 1. [file elife-66170-fig11-data1.csv]

FIG11E					FIG11F
1	3	5	10		1 Hz	3 Hz	5 Hz	10 Hz
0.16666667	0.5	0.83333333	0.58333333		0.11153846	0.41025641	0.66538462	0.81410256
0.58333333	0.66666667	1.16666667	0.66666667		0.14583333	0.36805556	0.47569444	0.74652778
0.33333333	0.58333333	0.83333333	0.5		0.24418605	0.65116279	0.82170543	0.60755814
0.25	0.83333333	0.83333333	0.5		0.30128205	0.33333333	0.47435897	0.76923077
0.33333333	0.83333333	1	0.58333333		0.20157895	0.26754386	0.48245614	0.80263158
0.5	0.83333333	0.83333333	0.41666667		0.055	0.425	0.8	0.725
0.41666667	0.83333333	0.91666667	0.66666667		0.32758621	0.54597701	0.68103448	0.72413793
0.33333333	0.75	0.83333333	0.66666667		0.31111111	0.40833333	0.49722222	0.68055556
0.58333333	0.91666667	1.08333333	0.83333333		0.11868687	0.3989899	0.68686869	0.7979798
0.08333333	0.83333333	0.91666667	0.66666667		0.394	0.572	0.898	1.142
0.5	0.66666667	1.08333333	0.5		0.26724138	0.39655172	0.54310345	0.77011494
0.41666667	0.83333333	1	0.83333333		0.27419355	0.4811828	0.62903226	0.83064516
0.16666667	1	0.91666667	0.66666667		0.07592593	0.47777778	0.60555556	0.37160494
0.25	0.75	0.83333333	0.58333333
0.41666667	0.58333333	0.66666667	0.5
0.5	0.75	1	0.41666667
0.5	0.66666667	1	0.75
0.08333333	0.75	0.91666667	0.66666667
0.08333333	0.83333333	0.91666667	0.66666667
0.41666667	0.75	0.91666667	0.5
0.33333333	0.75	1	0.75
0.16666667	0.83333333	1.16666667	0.75
0.08333333	0.58333333	0.91666667	0.66666667
0.5	1	0.91666667	0.41666667
0.25	0.91666667	1	1.08333333
0	0.91666667	0.83333333	0.83333333
0.16666667	0.66666667	0.91666667	0.66666667
0	0.58333333	0.75	0.5
0.25	0.66666667	0.91666667	0.41666667
0.16666667	0.83333333	0.91666667	0.58333333
0.16666667	0.91666667	1	0.5
0.25	0.75	1	0.83333333
0.5	0.58333333	0.83333333	0.75
0.41666667	1.16666667	1.08333333	0.5
0.33333333	0.58333333	0.91666667	0.66666667
0.33333333	0.66666667	0.75	0.75
0.16666667	0.66666667	0.83333333	0.33333333
0.5	0.91666667	0.66666667	0.66666667
0.33333333	0.83333333	0.91666667	1.08333333
0.66666667	0.58333333	0.83333333	0.83333333
0.33333333	0.66666667	0.91666667	0.75
0.16666667	0.83333333	0.83333333	1.16666667
0.5	0.75	1	1
0.41666667	0.91666667	1	1
0.25	0.91666667	0.91666667	0.5
0.16666667	0.66666667	0.91666667	0.5
0.33333333	0.83333333	1	0.75
0.5	0.75	0.91666667	0.41666667
0.25	0.58333333	0.83333333	0.66666667
0.33333333	1	1.08333333	1.08333333
0.25	0.75	1	0.83333333
0.25	0.58333333	1.16666667	0.66666667
0.41666667	0.83333333	0.91666667	0.91666667
0.33333333	0.83333333	0.91666667	1
0.33333333	0.91666667	1	0.75
0.33333333	0.91666667	1	0.91666667
0.16666667	0.75	0.83333333	0.66666667
0.58333333	0.91666667	1	0.66666667
0.41666667	0.83333333	1	0.83333333
0.25	0.66666667	1.08333333	0.66666667
0.16666667	0.75	0.91666667	0.41666667
0	0.66666667	0.75	0.5
0.41666667	0.83333333	1	0.75
0.5	0.66666667	0.75	0.16666667
0.41666667	0.66666667	0.91666667	0.66666667
0.16666667	0.58333333	0.58333333	0.41666667
0.5	0.66666667	0.83333333	0.75
0.25	0.66666667	0.66666667	0.58333333
0.25	0.83333333	1.08333333	0.25
0.08333333	0.66666667	0.83333333	0.41666667
0.5	0.91666667	1.16666667	0.5
0.25	0.58333333	0.83333333	1
0.16666667	0.58333333	0.75	0.58333333
0.25	0.83333333	1.08333333	0.66666667
0.16666667	0.5	0.75	0.83333333
0.16666667	0.66666667	0.83333333	0.66666667
0.41666667	0.5	0.91666667	0.66666667
0.25	0.66666667	1.08333333	1.08333333
0	0.41666667	0.25	0.25
